1 ***S. pombe* Rtf2 is Important for Replication Fork Barrier Activity of *RTS1* via**  
2 **Splicing of Rtf1**

3

4 Alice M. Budden<sup>1</sup>, Murat Eravci<sup>2</sup>, Eduard Campillo-Funollet<sup>1,3</sup>, Karel Naiman<sup>1,4,\*</sup>, Antony M.  
5 Carr<sup>1,\*</sup>

6

7

8 <sup>1</sup> Genome Damage and Stability Centre, School of Life Sciences, University of Sussex, Falmer,  
9 BN1 6RQ, UK.

10 <sup>2</sup> Department of Biochemistry and Biomedicine, School of Life Sciences, University of Sussex,  
11 Falmer, BN1 9QG, UK.

12 <sup>3</sup> Present address: School of Mathematics, Statistics and Actuarial Science, University of  
13 Kent, Canterbury, CT2 7NZ, UK.

14 <sup>4</sup> Present address: Cancer Research Center of Marseille (CRCM), INSERM U1068, CNRS, Aix  
15 Marseille Université, Institut Paoli-Calmettes, 27 Boulevard Leï Roure, 13009 Marseille,  
16 France.

17

18 \* Correspondence: [a.m.carr@sussex.ac.uk](mailto:a.m.carr@sussex.ac.uk), [karel.naiman@inserm.fr](mailto:karel.naiman@inserm.fr)

19

20 **Abstract:**

21

22 Arrested replication forks, when restarted by homologous recombination, result in error-  
23 prone DNA syntheses and non-allelic homologous recombination. Fission yeast *RTS1* is a  
24 model fork barrier used to probe mechanisms of recombination-dependent restart. *RTS1*  
25 barrier activity is entirely dependent on the DNA binding protein Rtf1 and partially dependent  
26 on a second protein, Rtf2. Human RTF2 was recently implicated in fork restart, leading us to  
27 examine fission yeast Rtf2's role in more detail. In agreement with previous studies, we  
28 observe reduced barrier activity upon *rtf2* deletion. However, we identified Rtf2 to be  
29 physically associated with mRNA processing and splicing factors and *rtf2* deletion to cause  
30 increased intron retention. One of the most affected introns resided in the *rtf1* transcript.  
31 Using an intronless *rtf1* we observed no reduction in RFB activity in the absence of Rtf2. Thus,  
32 Rtf2 is essential for correct *rtf1* splicing to allow optimal *RTS1* barrier activity.

## 33 Introduction

34

35 The completion of DNA synthesis is crucial for maintaining genome stability and survival but  
36 a variety of obstacles to DNA replication have the ability to stall replication forks (Magdalou  
37 et al., 2014). Stalled forks are usually stabilised by the Intra-S phase checkpoint such that they  
38 can ordinarily resume DNA synthesis once the obstacle has been removed or resolved  
39 (Lambert and Carr, 2013). However, if replication cannot be resumed and/or the replication  
40 fork becomes non-functional, this is known as replication fork collapse. In the majority of  
41 cases collapsed replication forks are rescued by a convergent fork, allowing the completion  
42 of DNA synthesis. Nevertheless, in regions of the genome with a paucity of origins, or when  
43 two convergent forks collapse without an intervening origin, collapsed replication forks must  
44 be actively restarted in order to complete replication.

45

46 Homologous recombination underpins several mechanisms that have evolved to restart  
47 collapsed replication forks. Recombination-dependent replication (RDR) mechanisms include  
48 the restart of replication forks following fork reversal plus DNA end processing (Ait Saada et  
49 al., 2018) and break-induced replication (Malkova and Ira, 2013), where replication is initiated  
50 from one end of a DNA double strand break (DSB). Yeast model systems have been  
51 instrumental in identifying and characterising RDR mechanisms: BIR has been extensively  
52 characterised in *Saccharomyces cerevisiae* and has been shown to occur in G2 phase and to  
53 involve initial DSB processing followed by Rad51-dependent strand invasion that results in  
54 conservative DNA synthesis via a migrating D-loop. In contrast, DSB-independent RDR  
55 (Mizuno et al., 2009) has been characterised mainly in *Schizosaccharomyces pombe* and has  
56 been shown to involve fork reversal, processing of the resulting DNA double strand end and  
57 Rad51-dependent strand invasion that results in semi-conservative replication (Teixeira-Silva  
58 et al., 2017; Miyabe et al., 2015).

59

60 A key tool used in *S. pombe* to investigate the mechanisms involved in replication fork arrest,  
61 collapse and restart is a site-specific replication fork barrier (RFB) that was initially identified  
62 close to the mating type locus (Dalgaard and Klar, 2000). This RFB, known as *RTS1* (Replication  
63 Termination Sequence 1), acts to ensure that replication across the mating type locus is  
64 unidirectional. It achieves this by acting as a polar barrier – i.e. it only arrests replication forks  
65 travelling from a single ‘restrictive’ direction (Dalgaard and Klar, 2001). Forks travelling in the  
66 opposite ‘permissive’ direction are unaffected by the barrier. The *RTS1* barrier was first  
67 defined as an 859 bp *EcoRI* fragment that was further refined into two regions, A and B, by  
68 deletion analysis. Region B contains four repeat sequences that bind to a Myb-domain  
69 protein, known as Rtf1 (Replication Termination Factor 1). Fork arrest at *RTS1* is entirely  
70 dependent on Rtf1 binding (Eydmann et al., 2008) and in the absence of Rtf1 replication of  
71 the *RTS1* sequence is entirely normal. In contrast, region A is defined as being required for  
72 enhancing barrier activity. Loss of region A has been reported to reduce barrier activity by  
73 approximately three quarters and this function was described as being dependent on a  
74 second protein, Rtf2 (Codlin and Dalgaard, 2003).

75

76 Interestingly, while Rtf1 appears to be *S. pombe* specific and is not evolutionarily conserved  
77 beyond the Myb-like DNA binding domain (Eydmann et al., 2008), Rtf2 is conserved in many  
78 eukaryotes including humans (Codlin and Dalgaard, 2003). Rtf2 belongs to a family of proteins

79 that are characterised by a C2HC2 Ring Finger motif predicted to fold up into a RING-finger  
80 structure with the ability to bind one Zn<sup>2+</sup> ion (Inagawa et al., 2009) and is likely to mediate  
81 protein-protein interactions. Studies in human cells have shown that *HsRTF2* acts to reduce  
82 the levels of replication fork restart and thus its removal from arrested replication forks via  
83 proteasomal shuttle proteins (DDI1 and DDI2) is important to allow replication fork restart to  
84 occur (Kottemann et al., 2018). Additionally, the nuclear receptor interacting protein 3  
85 (NIRP3) has been shown to upregulate DDI1 and increase polyubiquitylation of *HsRTF2*,  
86 promoting *HsRTF2* removal and replication fork restart upon replication stress (Suo et al.,  
87 2020). Within disease models, *HsRTF2* has also been identified as a causal factor for  
88 Alzheimer's Disease, although the exact mechanism remains unclear (Ou et al., 2021; Wingo  
89 et al., 2021). To further elucidate the conserved function of Rtf2 at stalled replication forks  
90 we investigated this protein further using a previously described *RTS1*-RFB system in *S. pombe*  
91 (Naiman et al., 2021).

92  
93 In agreement with previous studies on Rtf2 at the *RTS1* RFB, we observe reduced barrier  
94 activity upon *rtf2* deletion as assayed both by polymerase-usage sequencing (Pu-seq) and a  
95 replication slippage assay. However, in our system the mechanism of action of Rtf2 at *RTS1*  
96 does not occur via a region A of *RTS1*, as had been previously reported. Using a proximity-  
97 based mass spectrometry method we identified Rtf2 to be physically associated with mRNA  
98 processing and splicing factors. cDNA-Seq of mature polyA-mRNA revealed a modest global  
99 increase in the levels of intron retention in *rtf2Δ* cells. Intron retention was not uniform and  
100 specifically affected a subset of introns, with one of the most affected introns residing within  
101 the *rtf1* transcript. Using an intronless *rtf1* (*rtf1Δint*), that does not require splicing to encode  
102 a functional Rtf1 protein, we find that, in the absence of Rtf2, there was no reduction in RFB  
103 activity in comparison to when Rtf2 is present. These data demonstrate that the presence of  
104 Rtf2 is essential for the correct splicing of Rtf1 in order to allow optimal barrier activity at  
105 *RTS1*.

106

## 107 **Results**

108

### 109 ***Rtf2* is Important for Efficient Barrier Activity at *RTS1***

110 We have previously shown that RDR initiated at *RTS1* results in the formation of a non-  
111 canonical replication fork where DNA is semi-conservatively replicated with polymerase delta  
112 synthesising both the leading and the lagging strands (Miyabe et al., 2015). Interestingly, the  
113 resulting replication is error prone (Mizuno et al., 2013), showing elevated replication  
114 slippage events (Iraqi et al., 2012). The non-canonical nature of the RDR fork provides us  
115 with two tools to follow replication restart: first, we can estimate the percentage usage of  
116 non-canonical replication from the levels of replication slippage measured using a genetic  
117 reporter that reconstitutes uracil prototrophy (Iraqi et al., 2012). Second, we can track DNA  
118 polymerase movement, and thus non-canonical RDR forks, using a recently developed  
119 Polymerase-usage sequencing (Pu-seq) method (Naiman et al., 2021). In brief, Pu-seq utilises  
120 pairs of mutant *S. pombe* strains, each harbouring an rNTP permissive mutation in the  
121 catalytic subunit of either of the main replicative polymerases (Polε or Polδ) (Keszthelyi et al.,  
122 2015). In a ribonucleotide excision repair deficient background this allows rNMPs to persist in  
123 the DNA strand that is replicated by the mutant polymerase and enables subsequent strand-

124 specific mapping of replication by each of the main replicative DNA polymerases (Daigaku et  
125 al., 2015).

126

127 In order to use Pu-seq to study the HR-restarted replication fork with minimal interference  
128 from converging canonical replication forks, the *RTS1* barrier sequence has been placed in a  
129 region of the genome next to an early firing origin with a distant late firing origin downstream  
130 (Naiman et al., 2021) (Figure 1A). Thus, the predominant orientation of canonical replication  
131 across this region is in a rightward direction. The *RTS1* sequence has been inserted in the  
132 orientation that arrests replication forks originating from the early firing origin, but which is  
133 permissive to those originating from the late firing origin. In addition, to delay any replication  
134 forks initiating downstream of *RTS1* and thus increase the time available for replication forks  
135 blocked at *RTS1* to restart and replicate the downstream region, we inserted, 10x ribosomal  
136 DNA RFB (rRFB) sequences (*Ter2-Ter3*) ~10 Kb downstream of *RTS1*. The rRFB is also polar and  
137 we have inserted the 10x array in the orientation that will pause RFs originating from the late  
138 firing origin. The rRFBs do not collapse replications forks (Mizuno et al., 2013), do not utilise  
139 homologous recombination (HR) for restart (Calzada et al., 2005) and do not result in non-  
140 canonical replication forks that synthesise both strands with Pol $\delta$  (Naiman et al., 2021). To  
141 allow comparison of HR-restarted replication forks to unhindered canonical replication forks,  
142 the *RTS1* RFB activity is controlled by the presence/absence of Rtf1 (*rtf1*<sup>+</sup> = ON, *rtf1* $\Delta$  = OFF).

143

144 Polymerase-usage Sequencing (Pu-seq) was first performed on strains containing the *RTS1*  
145 construct with either the barrier activity OFF (*rtf1* $\Delta$ ) and barrier activity ON (*rtf1*<sup>+</sup>) (Figure 1B).  
146 When *RTS1* is OFF (*rtf1* $\Delta$ ) the *RTS1* sequence and the ~10kb to the right is replicated by Pol $\epsilon$   
147 on the top strand and by Pol $\delta$  on the bottom strand. This is consistent with predominant  
148 replication by rightward moving canonical forks. When the *RTS1* barrier is ON (*rtf1*<sup>+</sup>) there is  
149 an abrupt switch to Pol $\delta$  usage on the top strand at the point at which *RTS1* has been inserted  
150 and the downstream region is replicated with both strands being synthesised by Pol $\delta$ . This  
151 confirms that RDR is initiated at *RTS1* in most cells in the population, with both strands largely  
152 being replicated by a non-canonical fork across a region of ~10kb.

153

154 As discussed above, Rtf2 has been reported to enhance the fork arrest at active *RTS1* when  
155 replication structures are visualised by 2D gels (Codlin and Dalgaard, 2003). To investigate  
156 how Rtf2 affects the dynamics of polymerase usage downstream of the *RTS1* RFB, Pu-seq was  
157 next conducted in *rtf2* $\Delta$  cells. As expected, canonical replication is evident across *RTS1* and  
158 the downstream region when the barrier is OFF (*rtf1* $\Delta$ , *rtf2* $\Delta$ ) (Figure 1C). When *RTS1* is ON  
159 (*rtf1*<sup>+</sup> *rtf2* $\Delta$ ), the switch from Pol $\epsilon$  usage to Pol $\delta$  usage on the top is reduced at the site of *RTS1*  
160 when compared to *rtf2*<sup>+</sup> cells and Pol $\delta$  usage on the top (leading) strand across the ~10 kb  
161 downstream region is also reduced. This indicates that, when compared to *rtf2*<sup>+</sup>, a significantly  
162 reduced proportion of cells in the *rtf2* $\Delta$  population arrest the replication fork and switch to  
163 RDR to replicate the region downstream of the barrier (Figure 1C). This is particularly evident  
164 when the ratio of polymerase usage across both strands is calculated (Figure 1D). For  
165 canonical replication this is calculated to be Pol $\delta$ :Pol $\epsilon$  = 50:50, whereas with increasing levels  
166 of RDR in the population the same calculations are expected to generate a bias towards  
167 Pol $\delta$ :Pol $\epsilon$  = 100:0. In *rtf2*<sup>+</sup> cells, there is a clear Polymerase  $\delta$  bias at and downstream of active  
168 *RTS1* (ON: *rtf1*<sup>+</sup>) (Figure 1D). However, when *rtf2* is deleted the level of Pol $\delta$  bias produced at  
169 and downstream of the *RTS1* barrier sequence is reduced. As expected, in the absence of *rtf1*

170 **FIGURE 1**

171  
172  
173  
174  
175  
176  
177  
178  
179  
180  
181  
182  
183  
184  
185  
186  
187  
188  
189  
190  
191  
192  
193  
194  
195  
196  
197  
198  
199  
200  
201  
202  
203  
204  
205  
206  
207  
208  
209  
210  
211  
212  
213  
214  
215  
216  
217

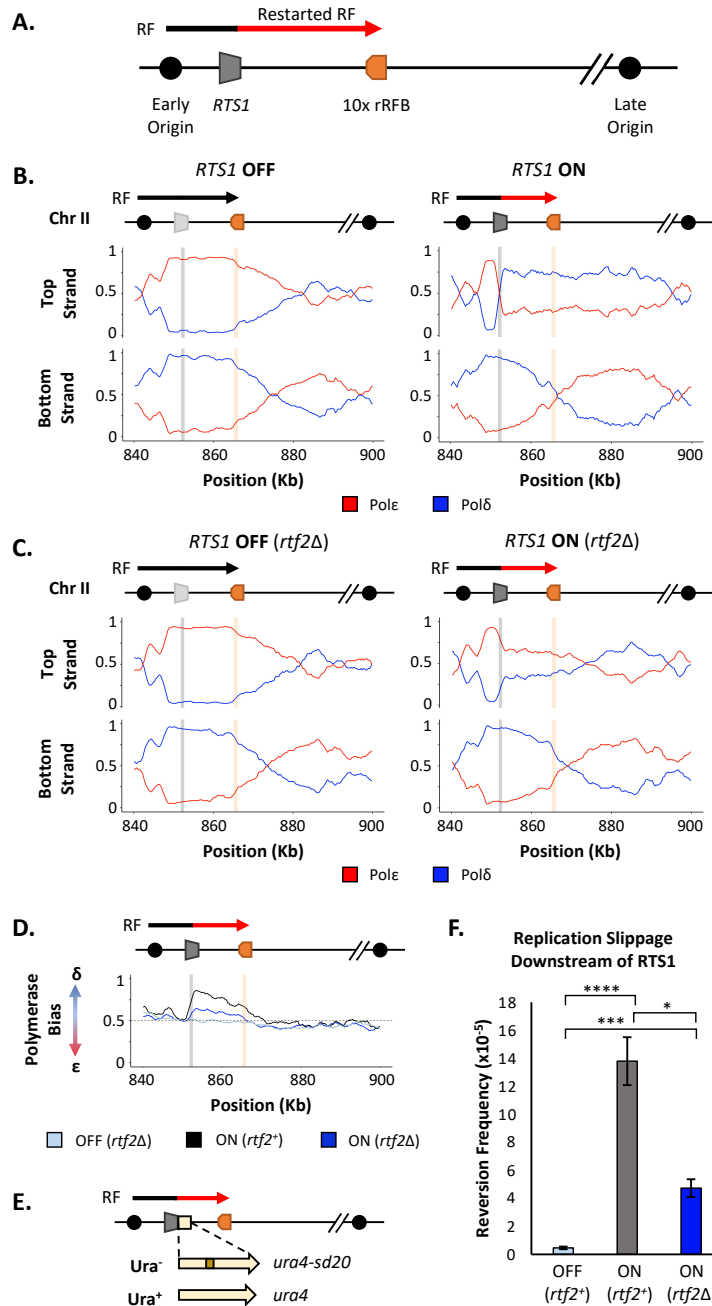

**Figure 1. Rtf2 deletion reduces replication fork restart at *RTS1*.** **A.** The *RTS1* sequence (grey box) is inserted between an early and a late firing replication origin and 10 ribosomal replication fork barriers (10x rRFB, orange box) are inserted ~10 Kb downstream of *RTS1*. The predominant direction of replication is shown with canonical (black) and restarted replication forks (red) indicated. **B.** Polymerase usage around the *RTS1* RFB locus in *rtf2<sup>+</sup>* cells. *RTS1* OFF (left panel) and ON (right panel). The ratio of Polymerase  $\epsilon$  (red) and Polymerase  $\delta$  (blue) for both the top and bottom strand is shown. **C.** Polymerase usage around the *RTS1* RFB locus in *rtf2 $\Delta$*  cells. Panel details as in B. **D.** Polymerase bias graph calculated using the ratio of polymerase usage across both strands around the *RTS1* RFB locus. **E.** Schematic of the *RTS1*-RFB replication slippage assay. A *ura4* allele containing a 20 bp tandem repeat (*ura4-sd20*) is inserted immediately downstream of the *RTS1* sequence. Replication slippage can result in loss of one repeat, which manifests as *ura<sup>+</sup>*. **F.** Replication fork slippage events scored as the frequency of *ura4<sup>+</sup>* reversions over 2 cell cycles using the *RTS1-ura4-sd20* replication fork slippage assay. Data from three independent experiments  $\pm$  SD. Statistical analysis by two-tailed Students T-test,  $p < 0.05 = *$ ,  $p < 0.01 = **$ ,  $p < 0.005 = ***$ ,  $p < 0.0005 = ****$ ).

218 (OFF: *rtf1* $\Delta$ ) the ratio of Pol $\delta$ :Pol $\epsilon$  = approximately 50:50, irrespective of the presence or  
219 absence of *rtf2*.

220

221 We further confirmed these findings by measuring the level of mutagenesis at a region  
222 potentially replicated by the restarted replication fork. To assay mutagenesis the *ura4-sd20*  
223 allele, which contains a 20 bp tandem repeat and renders cells uracil dependent (Iraqi et al.,  
224 2012), was integrated immediately downstream of the *RTS1* barrier (Figure 1E). Deletion of  
225 one tandem repeat by replication slippage will revert the allele to *ura4*<sup>+</sup>, resulting in uracil  
226 prototrophic cells. These events can subsequently be selected for, and quantified, as a  
227 readout for replication fork slippage events. In *rtf2*<sup>+</sup> cells, the activation of *RTS1* results in a  
228 large increase in replication fork slippage events in the downstream region when compared  
229 to cells where *RTS1* is OFF (Figure 1F). For *rtf2* $\Delta$  cells there is a reduction in replication fork  
230 slippage events downstream of an active *RTS1* in comparison to *rtf2*<sup>+</sup> cells, but this was not  
231 reduced to the low levels seen when *RTS1* was OFF. This reduction in replication fork slippage  
232 when *rtf2* is deleted is fully consistent with, and likely reflects, the reduced levels of restarted  
233 replication forks evident in the Pu-seq traces.

234

235 Taken together these results suggest that an increased proportion of replication forks remain  
236 canonical ( $\epsilon/\delta$ ) after encountering the *RTS1* RFB in the absence of Rtf2, with only around a  
237 third of replication forks arresting and restarting using non-canonical ( $\delta/\delta$ ) replication.  
238 Therefore, in *rtf2* $\Delta$  cells, only a subset of replication forks block at *RTS1* and restart via RDR  
239 when compared to the *rtf1*<sup>+</sup>. The other replication forks either arrest briefly at *RTS1* and  
240 resume as a canonical replication fork, or they do not get blocked at *RTS1* and instead  
241 continue replication across the region as in an *RTS1* OFF situation.

242

#### 243 ***Rtf2 Does Not Increase RTS1 Barrier Activity Via Interactions With Enhancer Region A***

244 *RTS1* is annotated as being composed of two main regions, A and B (Figure 2A). Region B  
245 contains four repetitive sequence motifs and is proposed to bind Rtf1 (Codlin and Dalgaard,  
246 2003). It has previously been reported Rtf2 enhances *RTS1* barrier activity by either direct or  
247 indirect association with region A. This was because a similar and non-additive reduction in  
248 the blocking signal (monitored by 2D gel electrophoresis) was observed for a plasmid-borne  
249 *RTS1* construct lacking region A as was evident in *rtf2* $\Delta$  cells (Codlin and Dalgaard, 2003). To  
250 confirm this observation in our *RTS1* system and characterise any impact of region A on  
251 polymerase usage downstream of an active (*rtf1*<sup>+</sup>) *RTS1*, region A was deleted from the *RTS1*  
252 sequence and the modified *RTS1\_A* $\Delta$  construct inserted to replace *RTS1*. The modified locus  
253 still contains the downstream 10xrRFBs. The truncated *RTS1\_A* $\Delta$  sequence was also  
254 incorporated into the replication fork slippage construct, to produce *RTS1\_A* $\Delta$ :*ura4-sd20*. If  
255 Rtf2 is performing an enhancing function for arrest at *RTS1* via region A, the same profiles of  
256 mutagenesis and polymerase usage would be expected for *rtf2* $\Delta$  and *RTS1\_A* $\Delta$ .

257

258 We first monitored the levels of mutagenesis downstream of *RTS1* using *RTS1:ura4-sd20* and  
259 *RTS1\_A* $\Delta$ :*ura4-sd20* (Figure 2B) loci. Similar basal levels of replication fork slippage were seen  
260 in both systems when *RTS1* was OFF (*rtf1* $\Delta$ ). As expected, replication fork slippage rates were  
261 also similar when *rtf2* is deleted in both systems when the barrier is ON (*rtf1*<sup>+</sup> *rtf2* $\Delta$ ). If region  
262 A is required for the enhancing effect on fork arrest at *RTS1* by Rtf2, the levels of replication  
263 fork slippage when the barrier is ON would be expected to be reduced in *RTS1\_A* $\Delta$  *rtf2*<sup>+</sup> cells

264 to the same level as seen *RTS1 rtf2Δ*. However, this was not the case and equivalent levels of  
265 replication fork slippage are observed for both *RTS1* and *RTS1\_ΔA* constructs in the ON (*rtf1<sup>+</sup>*  
266 *rtf2<sup>+</sup>*) state. This suggests that region A is dispensable for *RTS1* arrest and RDR restart  
267 efficiency in our system and is not likely to be a site of Rtf2 function.

268

269 To establish the extent of RDR occurring in the absence of region A, Pu-seq was performed  
270 on strains containing the *RTS1\_ΔA* system. As expected, when barrier activity was OFF  
271 (*rtf1Δ*) replication was canonical across the region, as has previously been seen for *RTS1*  
272 (Figure 2C; top). When the barrier was ON (*rtf1<sup>+</sup>*), the same levels of Polδ bias (representing  
273 non-canonical RDR) was observed for *RTS1\_ΔA* as was seen for *RTS1* (Figure 2C; bottom  
274 left). Similarly, when the barrier activity was ON and Rtf2 function was absent (*rtf1<sup>+</sup>, rtf2Δ*)  
275 the same reduced level of Polδ bias was observed for both *RTS1\_ΔA* and *RTS1*. Taken  
276 together, these results indicate that Rtf2 does not specifically interact with, or function  
277 through, region A and that region A is dispensable for normal levels of fork arrest and  
278 restart by RDR at this locus.

279

### 280 ***DDI1* Homolog in *S. pombe* (*Mud1*) Is Not Responsible For The Degradation Of Rtf2**

281 Having shown Rtf2 is not interacting with *RTS1* we aimed to determine if Rtf2 was playing a  
282 similar role through *RTS1* as had been suggested for its role at stalled replication forks in  
283 human cells (Kottemann et al., 2018; Suo et al., 2020). Human RTF2 is removed from stalled  
284 replication forks and targeted to the proteasome via proteasomal shuttle proteins DDI1/2. To  
285 establish if *S. pombe* Rtf2 is a client protein for the equivalent proteasomal shuttle we deleted  
286 the *S. pombe* gene encoding the DDI1/2 homolog, *mud1* (Trempe et al., 2005), and  
287 determined cell sensitivity to agents capable of stalling replication forks (Figure S1). DDI1/2  
288 knockdown in human cells sensitises to HU treatment, and *S. pombe rtf2Δ* cells are sensitive  
289 to high levels of MMS. Deletion of *mud1* did not result in sensitivity to MMS (Figure S1A) and  
290 a double deletion mutant, *mud1Δ rtf2Δ*, displayed no increase in MMS sensitivity in  
291 comparison to *rtf2Δ* alone. Similarly, no sensitivity to HU was observed for *mud1Δ, rtf2Δ* or  
292 the double *mud1Δ rtf2Δ*. These results suggest that Mud1 does not play the same role as has  
293 been observed for human DDI1/2 proteins.

294

295 To further investigate the equivalence between Mud1 and human DDI1/2 we monitored the  
296 turnover of Rtf2 in the presence and absence of Mud1. Upon treatment with cycloheximide,  
297 a translation inhibitor, the levels of Rtf2 are rapidly decreased (Figure S1B). In a *mud1Δ*  
298 background the rate of Rtf2 degradation was equivalent to *mud1<sup>+</sup>* cells. This further suggests  
299 that Mud1 is not playing the same role in regulating Rtf2 in *S. pombe* as has been observed  
300 for DDI1/2 in human cells.

301

### 302 ***Rtf2* Is Associated with mRNA Processing and Splicing Factors**

303 Having established that Rtf2 is not enacting its role on the levels of replication fork restart at  
304 *RTS1* via interaction with region A, we sought to investigate if it is instead travelling with the  
305 replication fork, as has been suggested for human RTF2 (Kottemann et al., 2018). A proximity  
306 biotin labelling-based mass spectrometry method, TurboID (Branon et al., 2018), was used to  
307 identify associated proteins. TurboID utilises a mutant version of the *E. coli* BirA biotin ligase  
308 (TbID) that catalyses biotin into biotinoyl-5'-AMP, which subsequently covalently attaches to  
309 proteins within close proximity (Choi-Rhee et al., 2004). Rtf2 was C-terminally tagged with



310 **FIGURE 2**

311

312

313

314

315

316

317

318

319

320

321

322

323

324

325

326

327

328

329

330

331

332

333

334

335

336

337

338

339

340

341

342

343

344

345

346

347

348

349

350

351

352

353

354

355

356

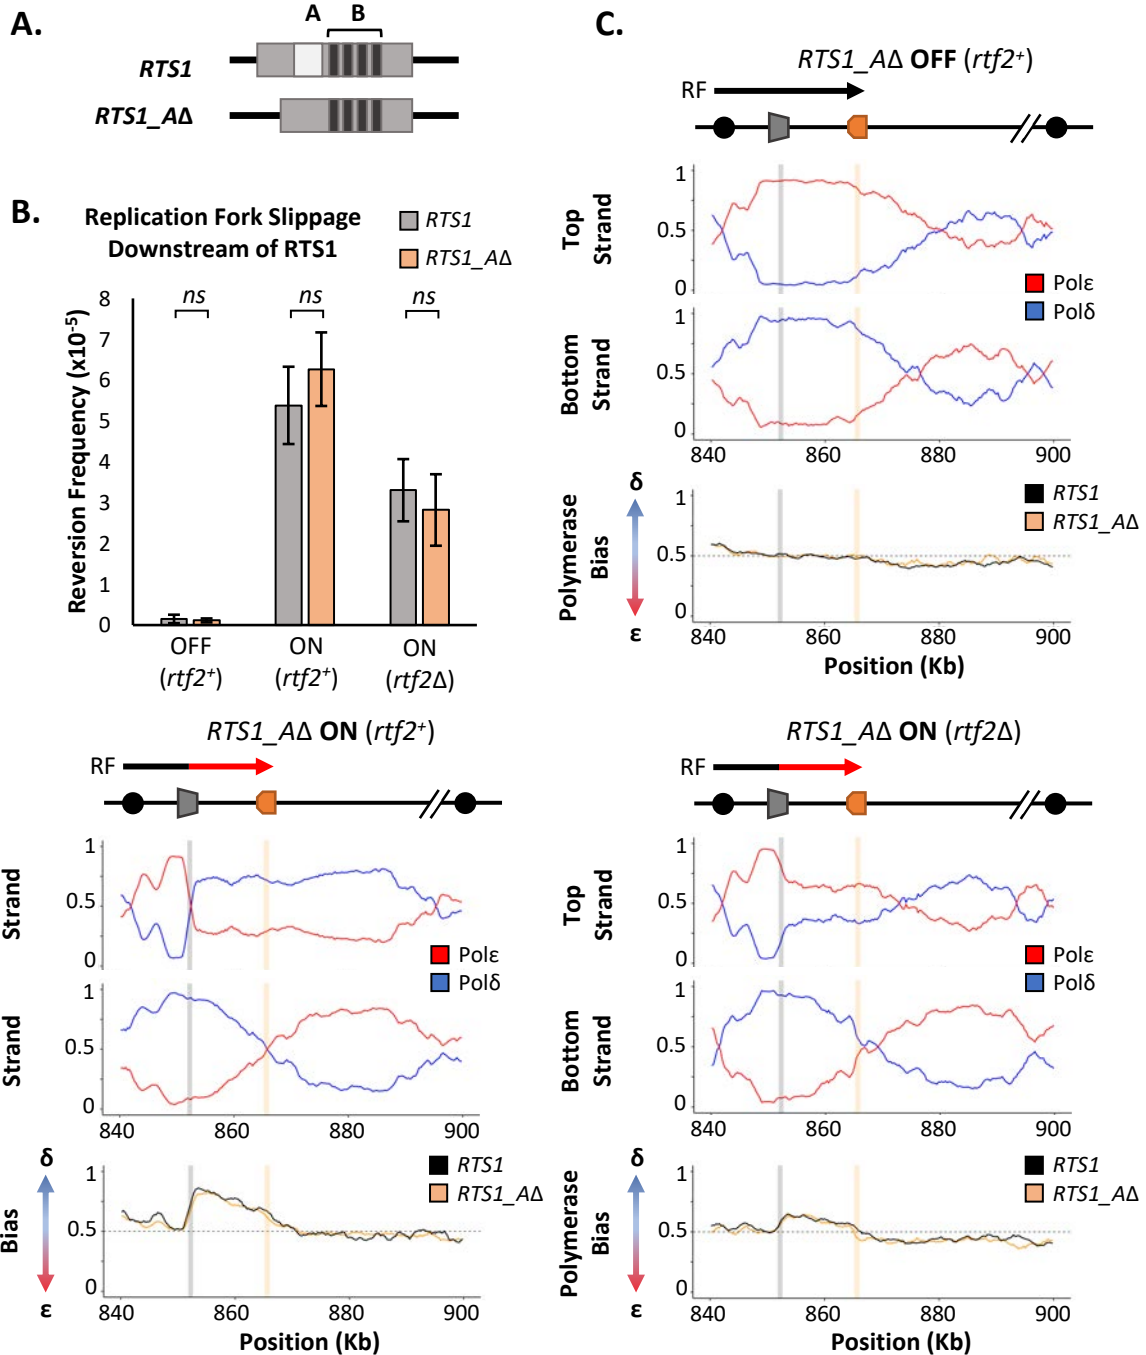

**Figure 2. *RTS1* region A is dispensable for efficient replication fork restart.** **A.** Schematic of the *RTS1* RFB. Region A is a ~60 bp purine rich region and Region B is ~450 bp containing the four repeated sequence motifs essential for *RTS1* activity. **B.** Replication fork slippage events scored as the frequency of *ura4*<sup>+</sup> reversions over 2 cell cycles. Data from three independent experiments ± SD. Statistical analysis by two-tailed Students T-test,  $p > 0.05$  = not significant (*ns*). **C.** Polymerase usage around the *RTS1\_ΔΔ* RFB locus for RFB OFF (Top panel) and ON (bottom left panel) for *rtf2*<sup>+</sup> and polymerase usage around the *RTS1\_ΔΔ* RFB locus in *rtf2Δ* cells with the barrier ON (bottom right panel). For each panel the ratio of Polymerase ε (red) and Polymerase δ (blue) for both the top and bottom strand is shown along with a polymerase bias graph calculated using the ratio of polymerase usage across both strands and comparing *RTS1\_ΔΔ* (orange) with the *RTS1* locus (black).

357 BirA<sup>TbID</sup> and an internal 3HA tag. To establish if the tag negated Rtf2 function, a spot test was  
358 conducted to monitor sensitivity to high levels of MMS (Figure S2A). There was no evident  
359 sensitivity of *rtf2-3HA-TurboID* cells, indicating the tag did not negate Rtf2 function.

360

361 *rtf2-3HA-TurboID* and control *rtf2*<sup>+</sup> cells were synchronised in S phase to enrich for replication  
362 (Figure S2B) structures or treated with MMS to enrich for stalled/collapsed replication forks.  
363 Following biotin addition, purification of biotin tagged proteins by streptavidin affinity and  
364 mass spectrometry, proteins that were enriched with statistical significance in comparison to  
365 no TurboID tag were identified for both conditions (Figure S2C and Supplementary Table 1).  
366 As expected, Rtf2 was identified as a hit with a large increase in abundance. A number of  
367 additional proteins were also identified as being significantly enriched in the *rtf2-3HA-TurboID*  
368 cells, and thus predicted to be in close proximity to the Rtf2<sup>TbID</sup> (Figure S2C). To determine  
369 which processes Rtf2 may be involved in, GO Term analysis was conducted on all significant  
370 hits for each condition (Figure S2D and Supplementary Tables 2,3). Based on the identification  
371 of human RTF2 as a replication factor, GO Terms associated with replication and associated  
372 processes were expected to be identified. Surprisingly, no such GO Terms were associated  
373 with the proteins identified as being in close proximity to Rtf2. Instead, the top GO Terms that  
374 arise are those to do with mRNA processing and splicing. This supports previous mass  
375 spectrometry results for *Arabidopsis Thaliana* Rtf2 (*AtRtf2*), which similarly identified splicing  
376 factors as Rtf2 interactors (Sasaki et al., 2015). Additionally, this is in concordance with a  
377 genome wide screen in *S. pombe* that identified Rtf2 as affecting splicing of two reporter  
378 introns (Larson et al., 2016).

379

### 380 ***Rtf2* Deletion Results in Increased Intron Retention**

381 To test if Rtf2 has an effect on splicing patterns, long-read direct cDNA-sequencing was  
382 conducted using an Oxford Nanopore MinION sequencer (Jain et al., 2015). Differential  
383 splicing can be efficiently identified by sequencing full length cDNA created from polyA-mRNA  
384 transcripts (Bolisetty et al., 2015). The polyA tail is only added to mature mRNA allowing the  
385 polyA tail to be used for purification of only those transcripts that have completed splicing.  
386 Sequencing was carried out on cDNA derived from polyA-mRNA samples from *rtf2*<sup>+</sup> and *rtf2Δ*  
387 cells to get an overview of alterations to splicing patterns across entire transcripts.  
388 Sequencing reads were mapped to the genome using minimap2 (Li, 2018) and mapped  
389 transcripts were compared to the annotated transcripts using GffCompare (Pertea and  
390 Pertea, 2020), which reports statistics (see Figure 3A right and Supplementary Table 4)  
391 relating to the measure of agreement of the input transcripts when compared to reference  
392 annotation.

393

394 The proportion of reads for each type of mapped transcript did not vary significantly between  
395 *rtf1*<sup>+</sup> and *rtf2Δ*, except for those indicating an intron retention event (type 'm') (Figure 3A).  
396 Having observed an increase in intron retention at the transcript level, we sought to confirm  
397 this via quantification of retention for each individual intron. Quantifying the fraction of  
398 mapped reads that span each intron vs. those that lack the intron and only map to the two  
399 flanking exons confirmed a shift toward increased intron retention in *rtf2Δ* cells (Figure 3B  
400 and Supplementary Table 5). Deletion of *rtf2* increases intron retention in only a subset of  
401 total introns, with 43 genes consistently resulting in transcripts with an intron retention event  
402 occurring 20% more often in at least 2 of three repeats in comparison to *rtf2*<sup>+</sup> (Supplementary

403 **FIGURE 3**

404  
405  
406  
407  
408  
409  
410  
411  
412  
413  
414  
415  
416  
417  
418  
419  
420  
421  
422  
423  
424  
425  
426  
427  
428  
429  
430  
431  
432  
433  
434  
435  
436  
437  
438  
439  
440  
441  
442  
443  
444  
445  
446  
447  
448  
449  
450

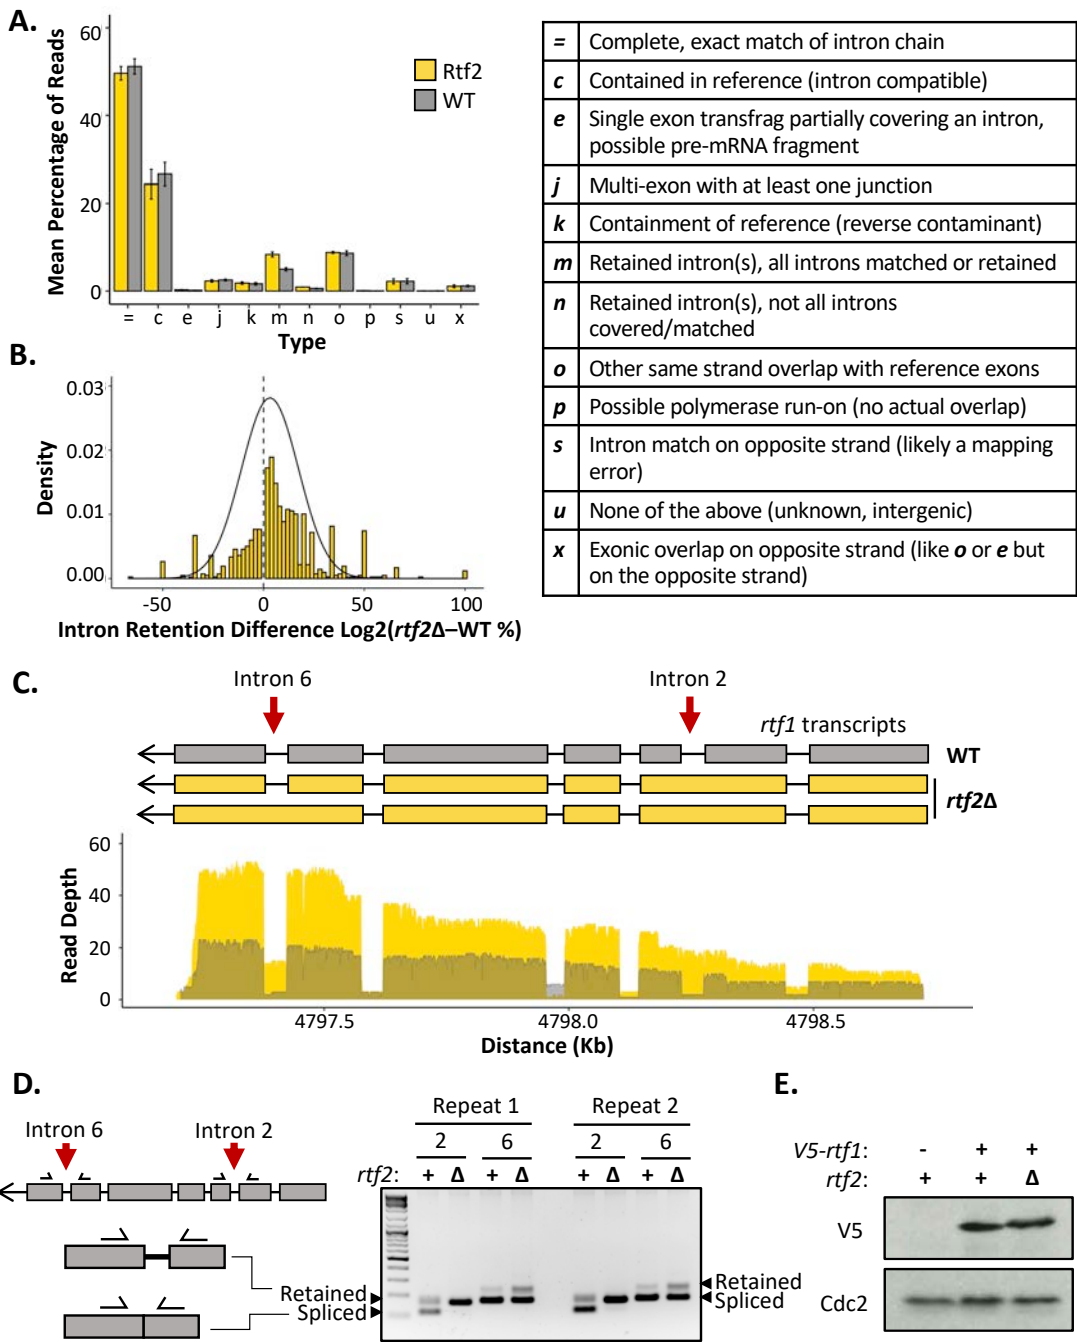

**Figure 3. *rtf2*Δ results in increased retention of a subset of introns including within the *rtf1* transcript. A.** GffCompare classification analysis of transcripts from WT (grey) and *rtf2*Δ (yellow) samples. Graph shows the mean of three biological repeats with error bars representing SD. The table (right) describes each classification. **B.** Graph showing the difference in intron retention for each individual intron with a normal distribution curve fitted. Introns that show no difference between WT and *rtf2*Δ are not included on the graph. **C.** Depth of reads mapped across the *rtf1* transcript for WT (grey) and *rtf2*Δ (yellow) samples. Corresponding transcripts as calculated by GffCompare are shown above. **D.** Two repeats of PCR amplification of intron 2 and intron 6 from cDNA derived from polyA-mRNA. Schematic shows the principle behind the shift in size from a smaller band, representing correctly spliced, to a larger band, representing a retained intron. **E.** Whole cell extract of *V5-rtf1* containing cells in WT and *rtf2*Δ background. Cdc2 is shown as a loading control.

451 Table 6). However, this number is likely an underestimate due to reduced read depth of low  
452 expression genes as well as degradation to the 5' end of some transcripts.

453

454 Of the increased intron retention transcripts, the *RTS1* DNA binding factor *rtf1* was identified,  
455 whose activity is crucial for the barrier activity (Figure 3C). Visual inspection of the transcript  
456 map produced from GffCompare clearly shows intron 2, which is usually an efficiently spliced  
457 intron, persists in essentially all the transcripts sequenced (type: 'm'). A second *rtf1* intron,  
458 intron 6, is also affected, showing retention in a proportion of the transcripts. The GffCompare  
459 transcript map shows that *rtf1* transcripts from *rtf2*<sup>+</sup> cells splice all introns effectively: i.e., are  
460 classed as equivalent to the reference genome (type: '=') and a single predominant transcript  
461 is predicted. However, two predominant *rtf1* transcripts were predicted by GffCompare for  
462 *rtf2*Δ cells, both of which retain intron 2 and one of which also retained intron 6 (type: 'm').  
463 To confirm these results, PCR amplification of each of these introns from cDNA derived from  
464 mature polyA-mRNA was performed (Figure 3D). Upper bands indicate the intron-retained  
465 isoform, while the lower bands indicate the correctly spliced isoform. For intron 2, the spliced  
466 isoform is undetectable, consistent with the read coverage from the cDNA-Seq data. There is  
467 a modest increase in the retained isoform for intron 6 in *rtf2*Δ in comparison to *rtf1*<sup>+</sup>. These  
468 data are fully consistent with the role of Rtf2 at *RTS1* being indirect, having its effect via  
469 ensuring the correct splicing of *rtf1*.

470

471 The subset of genes identified as having introns retained in *rtf2*Δ cells were analysed further.  
472 There were no obvious changes to overall gene expression or expression of 'intron-retained'  
473 (GffCompare group 'm') genes when analysing the abundance of transcripts between *rtf2*Δ  
474 and *rtf1*<sup>+</sup> (Figure S3A). The length of intron did not correlate with changes to intron retention  
475 (Figure S3B). The only correlation identified was a decrease in GC richness across the branch  
476 point (BP) and 3' splice site (3'SS) in those introns with the highest rates of intron retention  
477 (Figure S3C), locations important for the splicing reaction to occur. This reduction in GC  
478 richness fell outside of the 95% confidence interval calculated for a sample of 100 intron:exon  
479 sequences indicating this decreased GC content as a significant pre-requisite for the increased  
480 intron retention in *rtf2*Δ cells.

481

#### 482 ***Intronless rtf1 Rescues the rtf2Δ Phenotype Restoring Full RTS1 RFB Activity***

483 Intron 2 of the *rtf1* gene is 45 bp and, if not spliced, the adjacent exons remain in frame and  
484 a 15 amino acid insertion is predicted to occur between amino acids 202-203. To establish  
485 how the intron retention of *rtf1* in *rtf2*Δ cells effects the final protein product we N-terminally  
486 tagged *rtf1* with a V5 tag and performed a western blot on a whole cell extract (Figure 3E).  
487 The protein levels of Rtf1 do not vary between *rtf2*<sup>+</sup> and *rtf2*Δ cells. However, there is a small  
488 upward shift in the migration of the protein in *rtf2*Δ cells, which likely corresponds to the  
489 small increase in protein size expected from intron 2 retention.

490

491 Rtf2 clearly plays an important role in the correct splicing of *rtf1* mRNA. Incorrect splicing of  
492 the *rtf1* transcript could reduce the functionality of the protein and result in reduced binding  
493 to *RTS1* or the inefficient blocking of replication forks at this sequence. To test if the increased  
494 intron retention in *rtf1* mRNA is indeed responsible for reduced *RTS1* activity in *rtf2*Δ cells,  
495 we replaced the wildtype *rtf1* gene with an intronless *rtf1* gene (*rtf1*Δ*int*) at its native locus  
496 (Figure 4A). When transcribed, *rtf1*Δ*int* can no longer retain an intron and thus will mimic the

497 **FIGURE 4**

498

499

500

501

502

503

504

505

506

507

508

509

510

511

512

513

514

515

516

517

518

519

520

521

522

523

524

525

526

527

528

529

530

531

532

533

534

535

536

537

538

539

540

541

**A.**

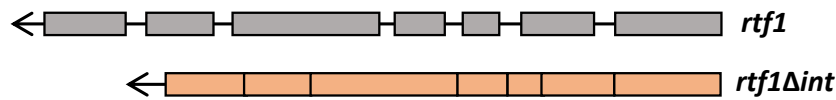

**B.**

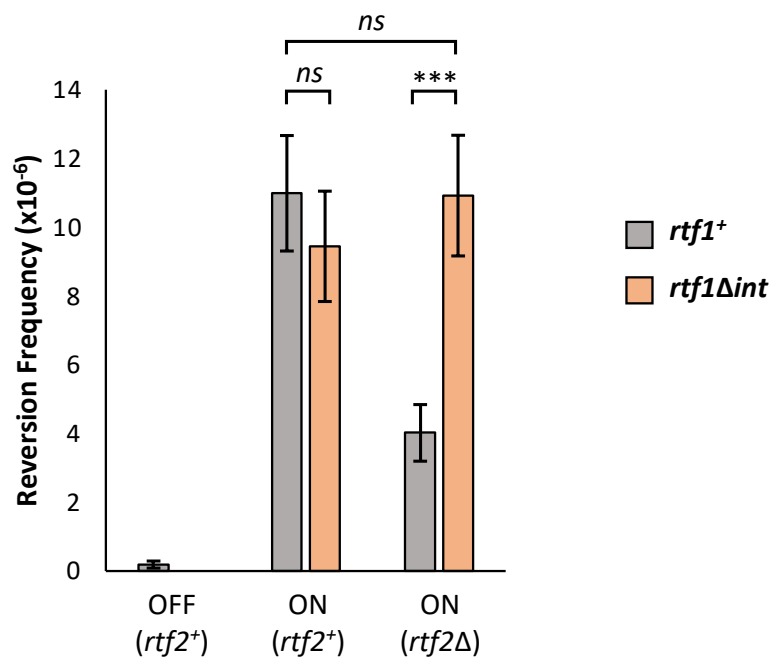

**C.**

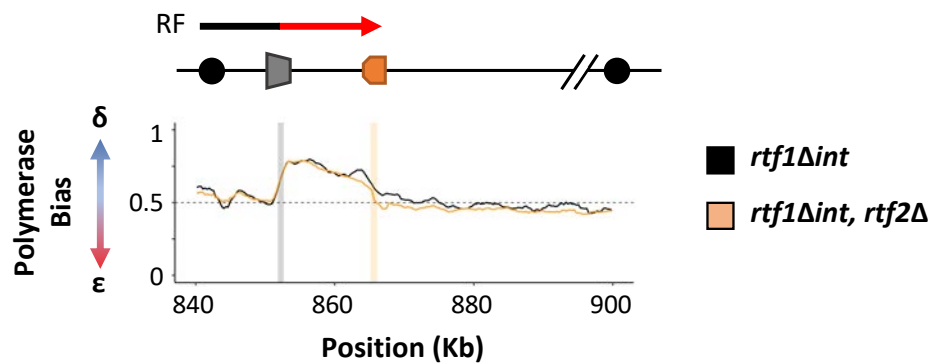

**Figure 4. Intronless *rtf1* rescues the *rtf2*Δ phenotype restoring full *RTS1* RFB activity.** **A.** Representative schematic of the *rtf1*<sup>+</sup> gene containing both exons and introns, and the intronless version, *rtf1*Δ*int* that contains only exons. *rtf1*Δ*int* was inserted at the native locus and is under the control of the native promoter. **B.** Replication fork slippage events scored as the frequency of *ura4*<sup>+</sup> reversions. Data from at least three independent experiments ± SD. Statistical analysis was by two-tailed Students T-test, *p* > 0.05 = not significant (*ns*), *p* < 0.005 = \*\*\*). **C.** Polymerase bias graph calculated using the ratio of polymerase usage across both strands at the *RTS1* RFB in cells expressing *rtf1*Δ*int* and either with or deleted for *rtf2*<sup>+</sup>.

542 largely efficient splicing that occurs in a *rtf2*<sup>+</sup> background (Figure 3C). To establish if *rtf1Δint*  
543 rescues the defect at *RTS1* RFB in *rtf2Δ* cells we first tested this allele in the replication fork  
544 slippage assay (Figure 4B). When *RTS1* is ON, both *rtf1*<sup>+</sup> and intronless *rtf1Δint* exhibit the  
545 same levels of replication fork slippage downstream of *RTS1*, indicating similar barrier  
546 functionality. However, when *rtf2* is deleted in the presence of *rtf1Δint*, fork slippage levels  
547 do not drop to the level seen in *rtf2Δ rtf1*<sup>+</sup> cells, and instead remains at the higher frequency  
548 seen for *rtf2*<sup>+</sup> *RTS1* ON. This increase in mutagenicity downstream of *RTS1* for *rtf1Δint* in *rtf2Δ*  
549 cells indicates the *RTS1* RFB activity is restored to *rtf2*<sup>+</sup> levels in the absence of Rtf2.

550

551 To confirm the increased mutagenicity downstream of *RTS1* in *rtf2Δ rtf1Δint* cells is due to  
552 *rtf2*<sup>+</sup> levels of RFB activity and replication fork restart, *rtf1Δint* was also analysed by Pu-seq  
553 (Figure 4C). In both *rtf2*<sup>+</sup> and *rtf2Δ* backgrounds, the presence of *rtf1Δint* resulted in the same  
554 high levels of Polδ bias downstream of active *RTS1*, which are equivalent to levels seen for  
555 *rtf1*<sup>+</sup>, *rtf2*<sup>+</sup> *RTS1* ON (c.f. Figure 1B). Raw Pu-seq traces also clearly show Polδ to be the  
556 predominant polymerase used in both the top and bottom strands downstream of *RTS1*  
557 (Figure S4). This demonstrates that the presence of Rtf2 is essential for the correct splicing of  
558 Rtf1 to allow efficient barrier activity at *RTS1*.

559

## 560 Discussion

561

562 The finding that the removal of human RTF2 from stalled replication forks is important to  
563 allow replication restart and maintain genome stability (Kottemann et al., 2018) led us to  
564 investigate the function of *S. pombe* Rtf2 in more detail. The Rtf2 protein was originally  
565 identified as having the role of enhancing the blocking capacity of the *RTS1* RFB in *S. pombe*  
566 (Codlin and Dalgaard, 2003). 2D gel analysis of replicating plasmids containing *RTS1* revealed  
567 a reduced pausing signal when cells were deleted for *rtf2*. A further study identified a visible  
568 increase in large Y-intermediates that was dependent on the Srs2 helicase (Inagawa et al.,  
569 2009). This was interpreted as Rtf2 acting downstream of Rtf1 to convert replication barrier  
570 activity at the *RTS1* locus into a replication termination site.

571

572 Here we confirm that the loss of Rtf2 indeed results in a decrease in replication fork arrest  
573 and restart by RDR at the *RTS1* RFB. However, we clearly identify Rtf2 as interacting with  
574 splicing factors and demonstrate increased intron retention in a subset of transcripts when  
575 *rtf2* is deleted. Importantly, we found that intron 2 of Rft1, a Myb-domain binding protein  
576 required for *RTS1* barrier activity (Eydmann et al., 2008), is not spliced in *rtf2Δ* cells and this  
577 results in a partially functional Rtf1 protein. Replacing the genomic *rtf1* gene with an  
578 intronless copy fully rescued the *rtf2Δ*-dependent defect in fork arrest at *RTS1*, clearly  
579 demonstrating that Rtf2 acts upstream of Rtf1 to allow the correct splicing of the *rtf1* cDNA  
580 and thus the production of fully functional Rtf1 protein.

581

582 Using 2D gel analysis of plasmids containing various deletion constructs of *RTS1*, previous  
583 work suggested Rtf2-dependent enhanced blocking capacity at *RTS1* functions via an  
584 interaction with Region A of the *RTS1* sequence (Codlin and Dalgaard, 2003). In our genomic  
585 *RTS1* system we showed that deletion of Region A (*RTS1\_ΔA*), does not affect the levels of  
586 non-canonical ( $\delta/\delta$ ) replication forks or the levels of replication fork slippage downstream of  
587 active *RTS1* (Figure 2). Therefore, these results contrast with the previous finding and

588 demonstrate that region A of *RTS1* is dispensable for the efficiency of barrier activity and not  
589 to be the site of Rtf2 interaction.

590

591 RTF2 in human cells has been shown to be enriched at nascent chromatin (Dungrawala et al.,  
592 2015; Kottemann et al., 2018). However, we see no evidence to suggest that *S. pombe* Rtf2 is  
593 associated with the replication fork from our biotin proximity labelling experiments: Mass  
594 spectrometry analysis of proteins within close proximity to Rtf2 did not identify any  
595 replication associated factors (Figure S2). The studies in human cells specifically enriched for  
596 nascent chromatin and it is therefore possible that this allowed higher sensitivity for Rtf2  
597 enrichment when compared to our TurboID experiments. Of note, a previous study (Inagawa  
598 et al., 2009) found Rtf2 to co-precipitate with *S. pombe* Pcn1 (PCNA). We did not find any  
599 evidence that Pcn1 was enriched in our TurboID MS data. It is possible that a Pcn1:Rtf2  
600 interaction does occur, but is very transient and only visualised in the previous study due to  
601 the use of overexpression plasmids.

602

603 Rtf2 is an abundant protein that is predicted to contain a RING motif similar to that found in  
604 the E3 SUMO ligases Pli1 and Nse2 in *S. pombe* (Watts et al., 2007) and potentially related to  
605 RING domains of ubiquitin E3 ligases. Furthermore, deletion of *pmt3* (*S. pombe* SUMO) has  
606 been reported to result in a similar decrease in replication fork stalling at *RTS1* as *rtf2Δ*  
607 (Inagawa et al., 2009), leading to speculation that Rtf2 acts at the *RTS1* stall site to SUMO  
608 modify replication factors. However, it has also been shown that ubiquitylation and  
609 sumoylation of splicing factors are important to maintain efficient splicing within a cell (Pozzi  
610 et al., 2017) and therefore it is also conceivable that the efficient splicing of *rtf1* intron 2, as  
611 well as other introns, is dependent on either sumoylation and/or ubiquitylation (Pozzi et al.,  
612 2018) of splicing factors by Rtf2. The balance of evidence suggests that Rtf2 has evolved a  
613 new function(s) in human cells to modulate replication fork restart: we are unable to identify  
614 any evidence that Rtf2 associates with replication proteins, *rtf2* deletion does not directly  
615 affect *RTS1*-dependent fork arrest or subsequent restart by RDR; *rtf2* deletion cells are not  
616 sensitive to the replication inhibitor HU. Furthermore, in human cells RTF2 is actively  
617 degraded via the DDI1/2 proteasomal shuttle system to regulate its activity at stalled forks.  
618 In *S. pombe* we saw no evidence that the DDI1/2 homolog, Mud1, is influencing Rtf2 stability  
619 or the response to HU treatment.

620

621 Rtf2 has also been identified in *Arabidopsis thaliana* as an essential protein that contains an  
622 additional non-conserved N-terminal extension (Sasaki et al., 2015). Mass spectrometry to  
623 identify *AtRtf2* interacting proteins revealed proteins involved in mRNA splicing, RNA binding  
624 and metabolism, as well as DNA binding and ribosomal proteins. Mass spectrometry for  
625 proteins interacting with *AtRtf2* truncated for the non-conserved N-terminal domain  
626 identified many of the same proteins, indicating the interactions and their specificity to the  
627 conserved core of RTF2 are likely to be conserved between *S. pombe* and humans.  
628 Furthermore, the cDNA-Seq we conducted identified a subset of introns that were  
629 inefficiently spliced in *rtf2Δ* cells (Figure S3). This is consistent with the study in *A. thaliana*,  
630 which also detected intron retention defects when *AtRTF2* was deleted (Sasaki et al., 2015).  
631 Interestingly, a genome wide screen in *S. pombe* for factors affecting mRNA splicing similarly  
632 identified deletion of *rtf2* to result in intron retention defects (Larson et al., 2016), supporting

633 our cDNA-Seq results (Figure 3). Whether Rtf2 acts directly as a splicing factor or indirectly  
634 effects spliceosome function remains to be elucidated.

635

636 Recently Rtf2 has been implicated in a number of additional physiological functions and  
637 pathologies including restriction of viral infection (Chia et al., 2020) and a possible causal  
638 factor for Alzheimer's disease in humans (Wingo et al., 2021; Ou et al., 2021). Alzheimer's has  
639 previously been associated with differential splicing patterns (Raj et al., 2018) raising the  
640 possibility that the mis-splicing observed in Alzheimer's patients could be connected to  
641 changes in RTF2 protein function in these patients. This needs to be investigated further but  
642 could provide a better understanding of the disease's progression.

643

644 In summary, we identify *S. pombe* Rtf2 as a key factor for the efficient splicing of a subset of  
645 introns and demonstrate that this explains the effects of *rtf2Δ* at the site-specific replication  
646 fork barrier *RTS1* (Figure 5).

647

### 648 **FIGURE 5**

649

650

651

652

653

654

655

656

657

658

659

660

661

662

663

664

665

666

667

668

669

670

671

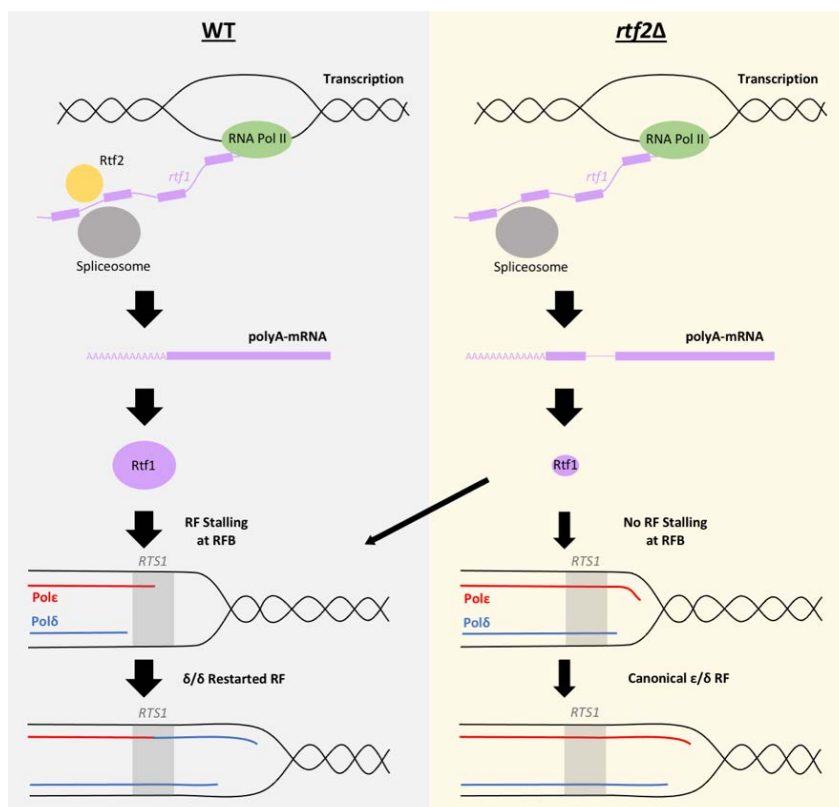

672

673 **Figure 5. Mis-splicing of *rtf1* mRNA in *rtf2Δ* cells results in reduced *RTS1* RFB Activity.** *Left panel:* In wildtype  
674 cells Rtf2 is present and allows for the correct splicing of *rtf1* mRNA and the production of functional Rtf1 protein.  
675 This results in replication fork stalling at *RTS1* and RDR, which produces non-canonical  $\delta/\delta$  replication forks.  
676 *Right panel:* In *rtf2Δ* cells, *rtf1* mRNA is mis-spliced resulting in retention of intron 2. This produces an Rtf1  
677 protein less capable of blocking replication forks at *RTS1* manifesting as some forks able to bypass *RTS1*  
678 unhindered and continue as canonical replication forks. A small portion of forks are still arrested and restart by  
679 RDR resulting in a small proportion of non-canonical  $\delta/\delta$  replication.



679 **Methods**

680

681 **Strain Construction**

682 Strains used in this study are listed in Table 1. Standard yeast genetic techniques and media  
683 were used as previously described (Moreno et al., 1991). All liquid cultures were grown in YES  
684 media at 30 °C unless otherwise stated. Cells were plated onto YEA plus the required selective  
685 agents during strain construction. Deletion of region A of *RTS1* was conducted using  
686 overlapping primers lacking region A (A30/A31; see Table 2) to amplify the pAW8-*RTS1-ura4*  
687 plasmid to create pAW8-*RTS1\_Δ-ura4*. This plasmid was then transformed into the relevant  
688 strain to introduce *RTS1\_Δ* via the recombination mediated cassette exchange (RMCE)  
689 method (Watson et al., 2008) followed by genetic crosses to create the final strains BAY237-  
690 BAY242. To create the *RTS1* slippage assay strains, a fragment containing a region of *ura4*  
691 containing the 20 bp tandem repeat of *ura4-sd20* (Iraqi et al., 2012) was synthesised by  
692 Eurofins and digested with *StuI* and *DraIII* for insertion into pAW8-*RTS1-ura4* or pAW8-  
693 *RTS1\_Δ-ura4* plasmids to create the plasmids pAW8-*RTS1-ura4-sd20* or pAW8-*RTS1\_Δ-*  
694 *ura4-sd20*. These plasmids were then transformed into the relevant strain to introduce the  
695 constructs via the recombination mediated cassette exchange (RMCE) method (Watson et al.,  
696 2008) to create the strains BAY144 and BAY249, respectively.

697

698 The BirA<sup>TbID</sup> C-terminally tagged Rtf2 was constructed via construction of plasmid pAW8-3HA-  
699 TurboID:KAN. A 3HA-BirA<sup>TbID</sup> encoding sequence was amplified using P11/P12 primers and  
700 the PCR fragment and pAW8 plasmid digested with *SphI*/*AscI* and ligated. The resulting  
701 plasmid, pAW8-3HA-TurboID:KAN was transformed into an *rtf2* C-terminal tagging base strain  
702 to create BAY246 via the RMCE method (Watson et al., 2008). The same method is used to C-  
703 terminally tag Rtf2 with 3HA alone, via transformation of pAW8-3HA:KAN to create BAY182.

704

705 To create *rtf1Δint* strains, NEBuilder HiFi DNA Assembly Master Mix (Cat #E2621L) was used  
706 to combine *rtf1* 5'UTR (P1/P2) with *rtf1* CDS (synthesised by Eurofins, P3/P4) and a  
707 hygromycin marker cassette (P5/P6) into *SpeI*/*SphI* digested pAW8 with the indicated  
708 primers. The construct was then amplified and transformed into cells via linear fragment  
709 transformation. N-terminal tagging of Rtf1 with the V5 tag was conducted by first introducing  
710 the *ura4* gene between *rtf1* 5'UTR and exon 1 and transformation to create a strain containing  
711 *ura4:rtf1*. A synthesised DNA sequence containing 400 bp of the 5'UTR followed by the V5  
712 tag, then a small amino acid linker (Gly-Ala-Gly-Ala-Gly-Ala) and finally 400 bp of exon 1 of  
713 *rtf1* was digested with *Sall* and ligated into *Sall* digested pAW1 plasmid to create pAW1-V5-  
714 *rtf1*. This fragment was then amplified and the linear fragment transformed into the *ura4:rtf1*  
715 containing strain, replacing *ura4* with the V5 tag to create BAY285.

716

717 **Replication Fork Slippage Assay**

718 *S. pombe* strains containing the *RTS1-ura4-sd20* construct were grown in 10 ml YE containing  
719 1 mg/ml 5-FOA overnight at 30 °C. Cells were washed in 1 ml 5-FOA free YE and resuspended  
720 into 10 ml fresh YE at a density of 2 x 10<sup>6</sup> cells/ml. Cells were grown for 2 cell cycles before  
721 pelleting and re-suspending in 1 ml ddH<sub>2</sub>O. 100 μl of cells were then plated in appropriate  
722 dilutions onto 2 YEA plates and 2 YNBA plates containing appropriate amino acids minus  
723 uracil. Plates were then incubated at 30 °C for 3-5 days. The numbers of colonies were  
724 counted and the average mean was taken between each of the two plates. Reversion

725 frequency of Ura<sup>+</sup> colonies was then calculated (Supplementary Table 7), taking into  
726 consideration the dilutions plated between YEA plates and YNBA plates lacking uracil.

727

### 728 **Protein Extraction and Western Blotting**

729 *S. pombe* strains grown to logarithmic phase were collected and 5 x 10<sup>7</sup> cells were washed  
730 and re-suspended in 200 µl ml 20% trichloroacetic acid (TCA). Samples treated with  
731 cycloheximide to block protein synthesis were treated at a final concentration of 100 µg/ml  
732 before collection at the indicated time points after addition of drug. Cells were then lysed  
733 using glass beads and a Ribolyser (Fast Prep Hybaid, Cat #FP120) for 3x 30 seconds at 6.5 m/s.  
734 Glass beads were removed and the pellet re-suspended in 200 µl 1X Protein Loading Buffer  
735 (250 mM Tris pH 6.8, 8% SDS, 20% glycerol, 20% β-mercaptoethanol, and 0.4% bromophenol  
736 blue) and boiled at 95 °C for 10 mins.

737

738 Proteins were separated using SDS-PAGE followed by transfer onto a nitrocellulose  
739 membrane (Amersham, Cat #45004003) using the Invitrogen XCell II Blot Module.  
740 Membranes were then blocked in 5% Milk (dissolved in PBST (PBS + 0.1% (v/v) Tween)) for 1  
741 hr before incubation with the relevant primary antibody diluted in 5% Milk PBST overnight at  
742 4 °C. Membranes were then washed 3x with PBST for 5 mins each at room temperature before  
743 incubation with an HRP-conjugated (horse radish peroxidase-conjugated) secondary antibody  
744 at room temperature for 1 hr followed by a further 3x PBST washes. Proteins were detected  
745 using the Western Lightning Plus-ECL chemiluminescent substrate (Perkin Elmer, Cat  
746 #NEL103001EA) and autoradiograph film processed in an X-ray film developer.

747

### 748 **Polymerase-Usage Sequencing**

749 The published protocol was used along with a custom perl script using Bowtie2 to align  
750 sequence files and convert mapped reads to count files (Keszthelyi et al., 2015). Analysis of  
751 the data was then conducted using a custom R script to obtain polymerase usage and  
752 polymerase bias information (Keszthelyi et al., 2015).

753

### 754 **Nanopore Direct cDNA-Sequencing**

755 Total RNA was extracted from 10 ml of logarithmically grown *S. pombe* cells using the  
756 MasterPure Yeast RNA Extraction Kit (Cat #MPY03100). PolyA-mRNA was isolated using  
757 NEBNext Poly(A) mRNA Magnetic Isolation Module (Cat #E7490). Purified PolyA-mRNA was  
758 then used to prepare cDNA sequencing libraries using the Nanopore Direct cDNA Sequencing  
759 Kit according to manufacturer's instructions (Cat #SQK-DCS109). The cDNA libraries were  
760 sequenced using the MinION sequencing device (Cat #MIN-101B) and associated flow cells  
761 (Cat #FLO-MIN106D). Sequenced reads were processed using the Nanopore Technology  
762 Reference Isoforms pipeline (<https://github.com/nanoporetech/pipeline-nanopore-ref-isoforms>). This pipeline sorts and aligns reads to the reference genome producing alignment  
763 BAM files and consensus transcript annotation GFF files. Calculations of intron retention (IR)  
764 were based on an alignment threshold of > 70% for reads to each intronic and flanking exonic  
765 sequence. An intron was only counted as an IR event if the subsequent exonic sequence was  
766 also present. It should be noted that this analysis does not necessarily identify all misplacing  
767 events.

768

769

770 Testing intron retention levels via PCR amplification was conducted using RevertAid First  
771 Strand cDNA Synthesis Kit (Thermo, Cat #K1621) to create cDNA from mRNA. Amplification of  
772 *rtf1* intron 2 was carried out using primer pair P7/P8, and intron 6 amplified using P9/P10.  
773 PCR product were purified using a QIAquick PCR Purification Kit (Qiagen, Cat #28104) before  
774 running on a 2% agarose gel.

775

### 776 **Cell Synchronisation**

777 *S. pombe* strains containing the *cdc2asM17* ATP-analogue sensitive allele (Singh et al., 2021)  
778 were grown O/N at 28 °C. Once cell density reached  $2.5 \times 10^6$  cells/ml, 1:1000 volume of 3-  
779 BrB-PP1 (2 mM) was added to the culture and incubated at 28 °C for a further 3 hrs to  
780 synchronise in G2. Cultures were then filtered using a vacuum flask filter unit. Cells collected  
781 on the filter paper (0.22 µm, Millipore, Cat #N8645) were then washed 3 times by addition of  
782 fresh YE media and filtration. The cell coated filter paper was then placed into pre-warmed  
783 fresh YE media before resuspension by shaking. Cells were grown at 28 °C for sample  
784 collection in S phase.

785

### 786 **Affinity Capture of Biotinylated Proteins**

787 Capture of biotinylated proteins from *rtf2*<sup>+</sup> (untagged) and *rtf2-3HA-BirA* samples was  
788 conducted as previously described (Larochelle et al., 2019). After incubation with streptavidin  
789 Sepharose beads and subsequent washing steps, 50 µl SDS protein loading buffer (with added  
790 *d*-Desthiobiotin to a final concentration of 2.5 mM) was added to the beads and boiled at 95°C  
791 for 10 mins before cooling at RT for 10 mins.

792

### 793 **Filter Aided Sample Preparation (FASP) for MS Samples**

794 Beads were separated from supernatant as before and 50 µl of the eluate was added to 333  
795 µl of FASP Urea Solution (8 M Urea, 0.1 M Tris/HCl, pH 8.5, 30 mM DTT) and transferred to a  
796 Microcon Y M-30 (Millipore, 42410) filter unit. Filter units were centrifuged at 14,000 x g for  
797 15 min followed by addition of another 200 µl FASP Urea solution and centrifuged again. Flow  
798 through was discarded before addition of 100 µl FASP IAA (8 M Urea, 50 mM iodoacetamide  
799 (IAA)) solution to each filter unit and incubation at RT for 20 mins followed by centrifugation  
800 as before. Filter units then received 100 µl FASP Urea solution before centrifuging as before  
801 (this step is repeated twice for a total of three times). Flow through was discarded and 100 µl  
802 ABC buffer (50 mM Ammonium bicarbonate) was added to each filter unit before centrifuging  
803 at 14,000 x g for 10 mins (this step is repeated twice for a total of three times). Flow through  
804 was discarded and 40 µl digestion solution was added to each filter unit and incubated  
805 overnight in a wet chamber. Filter units were transferred to fresh collection tubes and  
806 centrifuged at 14,000 x g for 10 mins. Following this 40 µl ABC buffer was added and  
807 centrifuged again in the same conditions.

808

### 809 **Desalting of Peptides with Solid Phase Extraction (SPE) columns**

810 Filtrate from the FASP digestion was acidified by addition of 100 µl Buffer A\* (5% Acetonitrile,  
811 3% Trifluoroacetic Acid). SPE columns containing 8 mg C-18 resin (Pierce, 89870) were  
812 activated by addition of 100 µl 50% methanol and centrifuged at 1,500 x g for 1 min, and flow  
813 through discarded (repeated once for a total of two times). The columns were then  
814 equilibrated twice by addition of 200 µl Buffer A (5% Acetonitrile, 0.1% Formic Acid) and  
815 centrifuged as before discarding the flow through after each spin. Each sample was then

816 added to the equilibrated spin column and centrifuged as before, washed two times with 200  
817  $\mu$ l Buffer A before elution of the desalted peptides with 100  $\mu$ l of Buffer B (80% Acetonitrile,  
818 0.1% Formic Acid). Eluates were concentrated in a speedvac to a volume of 1-2  $\mu$ l and  
819 resuspended in 20  $\mu$ l of Buffer A before LC-MS/MS analysis.

820

### 821 **LC-MS/MS Run & Analysis**

822 Desalted peptide samples were analysed by a reversed-phase capillary nano liquid  
823 chromatography system (Ultimate 3000, Thermo Scientific) connected to a Q Exactive HF  
824 mass spectrometer (Thermo Scientific). Samples were injected and concentrated on a trap  
825 column (PepMap100 C18, 3  $\mu$ m, 100  $\text{\AA}$ , 75  $\mu$ m i.d. x 2 cm, Thermo Scientific) equilibrated  
826 with 0.05% trifluoroacetic acid in water. After switching the trap column inline, LC  
827 separations were performed on a capillary column (Acclaim PepMap100 C18, 2  $\mu$ m, 100  $\text{\AA}$ ,  
828 75  $\mu$ m i.d. x 25 cm, Thermo Scientific) at an eluent flow rate of 300 nl/min. Mobile phase A  
829 contained 0.1 % formic acid in water, and mobile phase B contained 0.1% formic acid in 80  
830 % acetonitrile, 20% water. The column was pre-equilibrated with 5% mobile phase B and  
831 peptides were separated using a gradient of 5–44% mobile phase B within 40 min. Mass  
832 spectra were acquired in a data-dependent mode utilising a single MS survey scan ( $m/z$   
833 350–1650) with a resolution of 60,000 in the Orbitrap, and MS/MS scans of the 15 most  
834 intense precursor ions with a resolution of 15,000. HCD-fragmentation was performed for  
835 all ions with charge states of 2+ to 5+ using a normalized collision energy of 27 and isolation  
836 window of 1.4  $m/z$ . The dynamic exclusion time was set to 20 s. Automatic gain control  
837 (AGC) was set to  $3 \times 10^6$  for MS scans using a maximum injection time of 20 ms. For MS2  
838 scans the AGC target was set to  $1 \times 10^5$  with a maximum injection time of 25 ms.

839

840 MS and MS/MS raw data were analysed using the MaxQuant software package (version  
841 1.6.12.0) with an implemented Andromeda peptide search engine (Tyanova et al., 2016). Data  
842 were searched against the FASTA formatted Uniprot reference proteome database  
843 of *Schizosaccharomyces pombe* (UniprotKB UP000002485). Perseus software (version  
844 1.6.15.0) was used to determine biologically significant hits as calculated by the Welch's T-  
845 test.

846

### 847 **Acknowledgments**

848 We thank Dr. Benno Kuroopka from BioSupraMol, Freie Universität Berlin for performing the  
849 LC-MS runs. AMC acknowledges Wellcome Trust award 110047/Z/15/Z.

850

### 851 **Competing Interests**

852 The authors declare no competing interests

853

### 854 **Data availability**

855 Sequence data is available under GEO dataset GSE192344.

856

### 857 **References**

858 Ait Saada, A., Lambert, S.A.E. & Carr, A.M. (2018) Preserving replication fork integrity and  
859 competence via the homologous recombination pathway. *DNA Repair (Amst)*, **71**, 135-147.  
860 Bolisetty, M.T., Rajadinakaran, G. & Graveley, B.R. (2015) Determining exon connectivity in  
861 complex mRNAs by nanopore sequencing. *Genome Biol*, **16**, 204.

862 Branon, T.C. et al. (2018) Efficient proximity labeling in living cells and organisms with  
863 TurboID. *Nat Biotechnol*, **36**, 880-887.

864 Calzada, A. et al. (2005) Molecular anatomy and regulation of a stable replisome at a paused  
865 eukaryotic DNA replication fork. *Genes Dev*, **19**, 1905-1919.

866 Chia, B.S. et al. (2020) Loss of the Nuclear Protein RTF2 Enhances Influenza Virus  
867 Replication. *J Virol*, **94**,

868 Choi-Rhee, E., Schulman, H. & Cronan, J.E. (2004) Promiscuous protein biotinylation by  
869 Escherichia coli biotin protein ligase. *Protein Sci*, **13**, 3043-3050.

870 Codlin, S. & Dalgaard, J.Z. (2003) Complex mechanism of site-specific DNA replication  
871 termination in fission yeast. *EMBO J*, **22**, 3431-3440.

872 Daigaku, Y. et al. (2015) A global profile of replicative polymerase usage. *Nat Struct Mol Biol*,  
873 **22**, 192-198.

874 Dalgaard, J.Z. & Klar, A.J. (2000) swi1 and swi3 perform imprinting, pausing, and termination  
875 of DNA replication in *S. pombe*. *Cell*, **102**, 745-751.

876 Dalgaard, J.Z. & Klar, A.J. (2001) A DNA replication-arrest site RTS1 regulates imprinting by  
877 determining the direction of replication at mat1 in *S. pombe*. *Genes Dev*, **15**, 2060-2068.

878 Dungrawala, H. et al. (2015) The Replication Checkpoint Prevents Two Types of Fork  
879 Collapse without Regulating Replisome Stability. *Mol Cell*, **59**, 998-1010.

880 Eydmann, T. et al. (2008) Rtf1-mediated eukaryotic site-specific replication termination.  
881 *Genetics*, **180**, 27-39.

882 Inagawa, T. et al. (2009) Schizosaccharomyces pombe Rtf2 mediates site-specific replication  
883 termination by inhibiting replication restart. *Proc Natl Acad Sci U S A*, **106**, 7927-7932.

884 Iraqui, I. et al. (2012) Recovery of arrested replication forks by homologous recombination is  
885 error-prone. *PLoS Genet*, **8**, e1002976.

886 Jain, M. et al. (2015) Improved data analysis for the MinION nanopore sequencer. *Nat*  
887 *Methods*, **12**, 351-356.

888 Keszthelyi, A. et al. (2015) Mapping ribonucleotides in genomic DNA and exploring  
889 replication dynamics by polymerase usage sequencing (Pu-seq). *Nat Protoc*, **10**, 1786-1801.

890 Kottemann, M.C. et al. (2018) Removal of RTF2 from Stalled Replisomes Promotes  
891 Maintenance of Genome Integrity. *Mol Cell*, **69**, 24-35.e5.

892 Lambert, S. & Carr, A.M. (2013) Impediments to replication fork movement: stabilisation,  
893 reactivation and genome instability. *Chromosoma*, **122**, 33-45.

894 Larochelle, M. et al. (2019) Proximity-dependent biotinylation mediated by TurboID to  
895 identify protein-protein interaction networks in yeast. *J Cell Sci*, **132**,

896 Larson, A., Fair, B.J. & Pleiss, J.A. (2016) Interconnections Between RNA-Processing  
897 Pathways Revealed by a Sequencing-Based Genetic Screen for Pre-mRNA Splicing Mutants  
898 in Fission Yeast. *G3 (Bethesda)*, **6**, 1513-1523.

899 Li, H. (2018) Minimap2: pairwise alignment for nucleotide sequences. *Bioinformatics*, **34**,  
900 3094-3100.

901 Magdalou, I. et al. (2014) The causes of replication stress and their consequences on genome  
902 stability and cell fate. *Semin Cell Dev Biol*, **30**, 154-164.

903 Malkova, A. & Ira, G. (2013) Break-induced replication: functions and molecular mechanism.  
904 *Curr Opin Genet Dev*, **23**, 271-279.

905 Miyabe, I. et al. (2015) Polymerase  $\delta$  replicates both strands after homologous recombination-  
906 dependent fork restart. *Nat Struct Mol Biol*, **22**, 932-938.

907 Mizuno, K. et al. (2009) Nearby inverted repeats fuse to generate acentric and dicentric  
908 palindromic chromosomes by a replication template exchange mechanism. *Genes Dev*, **23**,  
909 2876-2886.

910 Mizuno, K. et al. (2013) Recombination-restarted replication makes inverted chromosome  
911 fusions at inverted repeats. *Nature*, **493**, 246-249.

912 Moreno, S., Klar, A. & Nurse, P. (1991) [56] Molecular genetic analysis of fission yeast  
913 *Schizosaccharomyces pombe*. In *Guide to Yeast Genetics and Molecular Biology: Methods in*  
914 *Enzymology*, Elsevier, pp. 795-823.

915 Naiman, K. et al. (2021) Replication dynamics of recombination-dependent replication forks.  
916 *Nat Commun*, **12**, 923.

917 Ou, Y.N. et al. (2021) Identification of novel drug targets for Alzheimer's disease by  
918 integrating genetics and proteomes from brain and blood. *Mol Psychiatry*, **26**, 6065-6073.

919 Pertea, G. & Pertea, M. (2020) GFF Utilities: GffRead and GffCompare. *F1000Res*, **9**,

920 Pozzi, B. et al. (2017) SUMO conjugation to spliceosomal proteins is required for efficient pre-  
921 mRNA splicing. *Nucleic Acids Res*, **45**, 6729-6745.

922 Pozzi, B. et al. (2018) When SUMO met splicing. *RNA Biol*, **15**, 689-695.

923 Raj, T. et al. (2018) Integrative transcriptome analyses of the aging brain implicate altered  
924 splicing in Alzheimer's disease susceptibility. *Nat Genet*, **50**, 1584-1592.

925 Sasaki, T. et al. (2015) An Rtf2 Domain-Containing Protein Influences Pre-mRNA Splicing  
926 and Is Essential for Embryonic Development in *Arabidopsis thaliana*. *Genetics*, **200**, 523-535.

927 Singh, P., Halova, L. & Hagan, I.M. (2021) Highly Synchronous Mitotic Progression in  
928 *Schizosaccharomyces pombe* Upon Relief of Transient Cdc2-asM17 Inhibition. *Methods Mol*  
929 *Biol*, **2329**, 123-142.

930 Suo, D. et al. (2020) NRIP3 upregulation confers resistance to chemoradiotherapy in ESCC via  
931 RTF2 removal by accelerating ubiquitination and degradation of RTF2. *Oncogenesis*, **9**, 75.

932 Teixeira-Silva, A. et al. (2017) The end-joining factor Ku acts in the end-resection of double  
933 strand break-free arrested replication forks. *Nat Commun*, **8**, 1982.

934 Trempe, J.F. et al. (2005) Mechanism of Lys48-linked polyubiquitin chain recognition by the  
935 Mud1 UBA domain. *EMBO J*, **24**, 3178-3189.

936 Tyanova, S., Temu, T. & Cox, J. (2016) The MaxQuant computational platform for mass  
937 spectrometry-based shotgun proteomics. *Nat Protoc*, **11**, 2301-2319.

938 Watson, A.T. et al. (2008) Gene tagging and gene replacement using recombinase-mediated  
939 cassette exchange in *Schizosaccharomyces pombe*. *Gene*, **407**, 63-74.

940 Watts, F.Z. et al. (2007) The role of *Schizosaccharomyces pombe* SUMO ligases in genome  
941 stability. *Biochem Soc Trans*, **35**, 1379-1384.

942 Wingo, A.P. et al. (2021) Integrating human brain proteomes with genome-wide association  
943 data implicates new proteins in Alzheimer's disease pathogenesis. *Nat Genet*, **53**, 143-146.

Table 1. Strain List

| Strain | Genotype                                                                                                                   | Reference             |
|--------|----------------------------------------------------------------------------------------------------------------------------|-----------------------|
| BAY119 | <i>Il::RTS1-ura4-10xrRFB, RTS1Δ::Phleo, rnh201Δ::KAN, rtf2Δ::NAT, cdc6L591G, ade6-704, leu1-32, ura4-d18</i>               | This study            |
| BAY120 | <i>Il::RTS1-ura4-10xrRFB, RTS1Δ::Phleo, rnh201Δ::KAN, rtf2Δ::NAT, rtf1Δ::HYG, cdc6L591G, ade6-704, leu1-32, ura4-d18</i>   | This study            |
| BAY121 | <i>Il::RTS1-ura4-10xrRFB, RTS1Δ::Phleo, rnh201Δ::KAN, rtf2Δ::NAT, cdc20_M630F, ade6-704, leu1-32, ura4-d18</i>             | This study            |
| BAY122 | <i>Il::RTS1-ura4-10xrRFB, RTS1Δ::Phleo, rnh201Δ::KAN, rtf2Δ::NAT, rtf1Δ::HYG, cdc20_M630F, ade6-704, leu1-32, ura4-d18</i> | This study            |
| BAY123 | <i>Il::RTS1-ura4-10xrRFB, RTS1Δ::Phleo, rnh201Δ::KAN, rtf1Δ::HYG, cdc20M630F, ade6-704, leu1-32, ura4-d18</i>              | (Naiman et al., 2021) |
| BAY124 | <i>Il::RTS1-ura4-10xrRFB, RTS1Δ::Phleo, rnh201Δ::KAN, cdc20M630F, ade6-704, leu1-32, ura4-d18</i>                          | (Naiman et al., 2021) |
| BAY125 | <i>Il::RTS1-ura4-10xrRFB, RTS1Δ::Phleo, rnh201Δ::KAN, rtf1Δ::HYG, cdc6L591G, ade6-704, leu1-32, ura4-d18</i>               | (Naiman et al., 2021) |
| BAY126 | <i>Il::RTS1-ura4-10xrRFB, RTS1Δ::Phleo, rnh201Δ::KAN, cdc6L591G, ade6-704, leu1-32, ura4-d18</i>                           | (Naiman et al., 2021) |
| BAY144 | <i>Il::Rura4sd20-10xrRFB, RTS1Δ::Phleo, rtf1Δ::NAT, ade6-704, leu1-32, ura4-d18</i>                                        | This study            |
| BAY146 | <i>Il::Rura4sd20-10xrRFB, RTS1Δ::Phleo, ade6-704, leu1-32, ura4-d18</i>                                                    | This study            |
| BAY176 | <i>Il::Rura4sd20-10xrRFB, RTS1Δ::Phleo, rtf2Δ::NAT, ade6-704, leu1-32, ura4-d18</i>                                        | This study            |
| BAY182 | <i>rtf2-3HA:KAN, ade6-704, leu1-32, ura4-d18</i>                                                                           | This study            |
| BAY237 | <i>Il::RTS1_Δ-ura4-10xrRFB, RTS1Δ::Phleo, rnh201Δ::KAN, cdc6L591G, ade6-704, leu1-32, ura4-d18</i>                         | This study            |
| BAY238 | <i>Il::RTS1_Δ-ura4-10xrRFB, RTS1Δ::Phleo, rnh201Δ::KAN, cdc20M630F, ade6-704, leu1-32, ura4-d18</i>                        | This study            |
| BAY239 | <i>Il::RTS1_Δ-ura4-10xrRFB, RTS1Δ::Phleo, rnh201Δ::KAN, rtf1Δ::HYG, cdc6L591G, ade6-704, leu1-32, ura4-d18</i>             | This study            |
| BAY240 | <i>Il::RTS1_Δ-ura4-10xrRFB, RTS1Δ::Phleo, rnh201Δ::KAN, rtf1Δ::HYG, cdc20M630F, ade6-704, leu1-32, ura4-d18</i>            | This study            |
| BAY241 | <i>Il::RTS1_Δ-ura4-10xrRFB, RTS1Δ::Phleo, rnh201Δ::KAN, rtf2Δ::NAT, cdc20_M630F, ade6-704, leu1-32, ura4-d18</i>           | This study            |
| BAY242 | <i>Il::RTS1_Δ-ura4-10xrRFB, RTS1Δ::Phleo, rnh201Δ::KAN, rtf2Δ::NAT, cdc6L591G, ade6-704, leu1-32, ura4-d18</i>             | This study            |
| BAY246 | <i>rtf2-3HA:TurboID:KAN, ade6-704, leu1-32, ura4-d18</i>                                                                   | This study            |
| BAY249 | <i>Il::RTS1_Δura4sd20-10xrRFB, RTS1Δ::Phleo, rtf1Δ::HYG, ade6-704, leu1-32, ura4-d18</i>                                   | This study            |
| BAY251 | <i>Il::RTS1_Δura4sd20-10xrRFB, RTS1Δ::Phleo, ade6-704, leu1-32, ura4-d18</i>                                               | This study            |
| BAY252 | <i>Il::RTS1_Δura4sd20-10xrRFB, RTS1Δ::Phleo, rtf2Δ::NAT, ade6-704, leu1-32, ura4-d18</i>                                   | This study            |

|               |                                                                                                                             |            |
|---------------|-----------------------------------------------------------------------------------------------------------------------------|------------|
| <b>BAY253</b> | <i>Il::RTS1_AΔura4sd20-10xrRFB, RTS1Δ::Phleo, rtf2Δ::NAT, rtf1Δ::HYG, ade6-704, leu1-32, ura4-d18</i>                       | This study |
| <b>BAY267</b> | <i>rtf2-3HA-TurboID:KAN, cdc2asM17, Il::RTS1-ura4-10xrRFB, ade6-704, leu1-32, ura4-d18</i>                                  | This study |
| <b>BAY268</b> | <i>mud1Δ::HYG, ade6-704, leu1-32, ura4-d18</i>                                                                              | This study |
| <b>BAY269</b> | <i>mud1Δ::HYG, rtf2-3HA:KAN, ade6-704, leu1-32, ura4-d18</i>                                                                | This study |
| <b>BAY273</b> | <i>mud1Δ::HYG, rtf2Δ::NAT, ade6-704, leu1-32, ura4-d18</i>                                                                  | This study |
| <b>BAY278</b> | <i>Il::RTS1-ura4sd20-10xrRFB, rtf1Δint:HYG, RTSΔ::Phleo, ade6-704, leu1-32, ura4-d18</i>                                    | This study |
| <b>BAY279</b> | <i>Il::RTS1-ura4sd20-10xrRFB, rtf1Δint:HYG, RTSΔ::Phleo, rtf2Δ::NAT, ade6-704, leu1-32, ura4-d18</i>                        | This study |
| <b>BAY280</b> | <i>Il::RTS1-ura4-10xrRFB, RTS1Δ::Phleo, rtf1Δint:HYG, rnh201Δ::KAN, cdc20M630F, ade6-704, leu1-32, ura4-d18</i>             | This study |
| <b>BAY281</b> | <i>Il::RTS1-ura4-10xrRFB, RTS1Δ::Phleo, rtf1Δint:HYG, rtf2Δ::NAT, rnh201Δ::KAN, cdc20M630F, ade6-704, leu1-32, ura4-d18</i> | This study |
| <b>BAY282</b> | <i>Il::RTS1-ura4-10xrRFB, RTS1Δ::Phleo, rtf1Δint:HYG, rnh201Δ::KAN, cdc6L591G, ade6-704, leu1-32, ura4-d18</i>              | This study |
| <b>BAY283</b> | <i>Il::RTS1-ura4-10xrRFB, RTS1Δ::Phleo, rtf1Δint:HYG, rtf2Δ::NAT, rnh201Δ::KAN, cdc6L591G, ade6-704, leu1-32, ura4-d18</i>  | This study |
| <b>BAY285</b> | <i>V5-rtf1, ade6-704, leu1-32, ura4-d18</i>                                                                                 | This study |
| <b>BAY286</b> | <i>V5-rtf1, rtf2Δ::NAT, ade6-704, leu1-32, ura4-d18</i>                                                                     | This study |

945



946 **Table 2. Primer List**

| <b>Name</b> | <b>Sequence</b>                            |
|-------------|--------------------------------------------|
| A30         | GGAGGTTGAGTGTGGGACGTTTCTGCCATACCCTTTTAAAGT |
| A31         | GGTATGGCAGAAACGTCCCACACTCAACCTCCCAAT       |
| P1          | ATTATACGAAGTTATGCATGGTTTGATATGAGGCAGATAC   |
| P2          | TTCCTTGCATAATAATGTTCACTTGTCTGAAG           |
| P3          | GAACATTATTATGCAAGGAAAAACAATTTAAG           |
| P4          | CGCTGGCCGGCTAGCATAAATCATCGGC               |
| P5          | TTTATGCTAGCCGGCCAGCGACATGGAG               |
| P6          | ATACCATATACGAAGTTATACGACAGCAGTATAGCGACCAG  |
| P7          | GGAGCAAACGACATTATCAC                       |
| P8          | CATCACGATGGTTATCAGAC                       |
| P9          | CTATGGACAGCAGATGCTTG                       |
| P10         | GCGGTGTAAGAATCATGTAA                       |
| P11         | GAAGTTATGCATGCTCTACCCGTATGATGTTCCGGA       |
| P12         | AGCTGCGGCGCGCCTCACTTTTCGGCAGACCGCAGAC      |

947

948 SUP FIG 1

949

950

951

952

953

954

955

956

957

958

959

960

961

962

963

964

965

966

967

968

969

970

971

972

973

974

975

976

977

978

979

980

981

982

983

984

985

986

987

988

989

990

991

992

A.

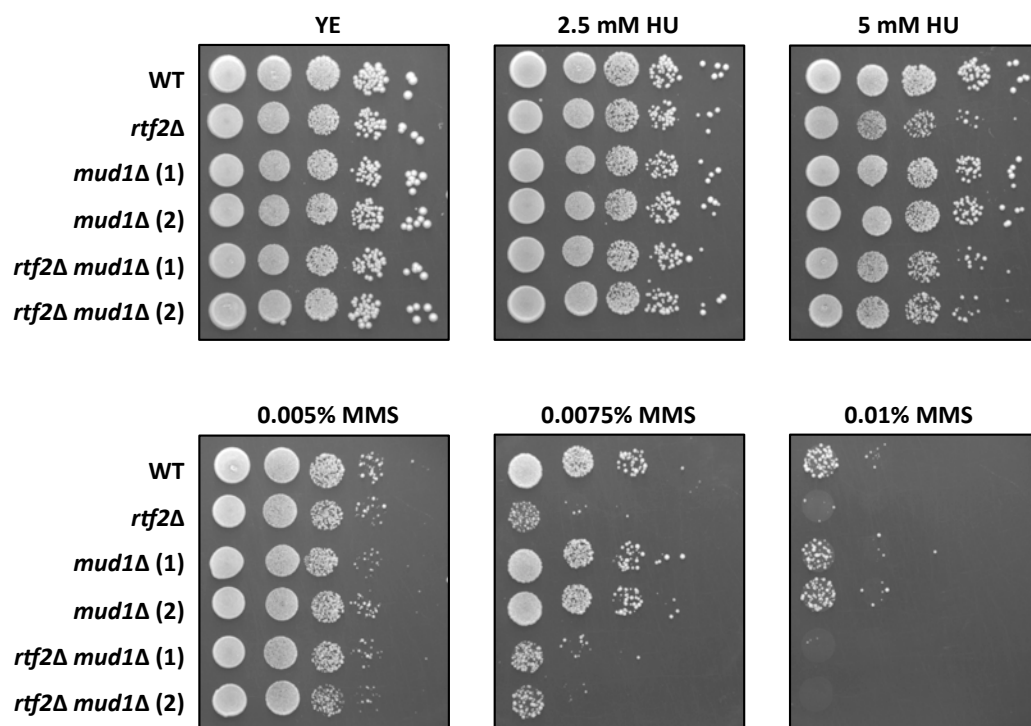

B.

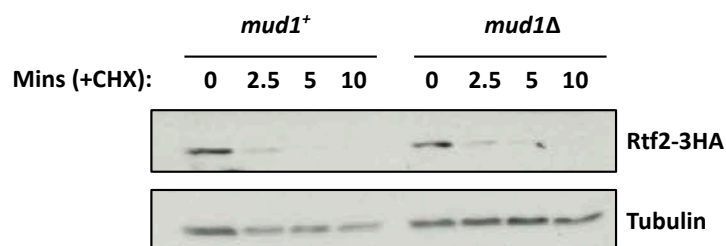

**Figure S1. Mud1 does not impact the turnover of Rtf2 or cell sensitivity to HU/MMS.** A. The absence of Mud1 does not reduce cell viability in the presence of HU/MMS. Cells were spotted onto plates in 10x serial dilutions and incubated at 30°C for 4 days. B. Cycloheximide treatment of cells containing Rtf2-3HA with (*mud1+*) and without (*mud1Δ*) Mud1 over the course of 10 minutes post-treatment. Presence of Rtf2 probed with anti-HA, and tubulin probed for with anti-tubulin as a loading control

994  
995  
996  
997  
998  
999

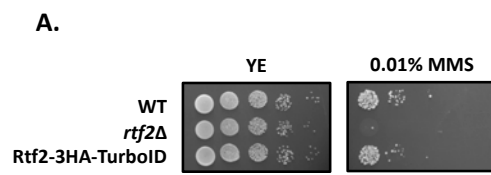

1000  
1001  
1002  
1003  
1004  
1005

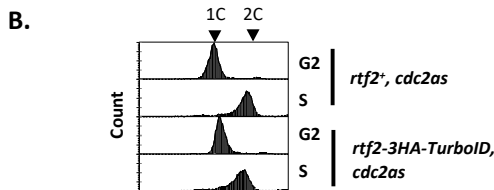

1006  
1007  
1008  
1009  
1010  
1011  
1012

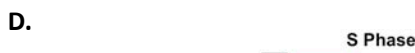

1013  
1014  
1015  
1016  
1017  
1018

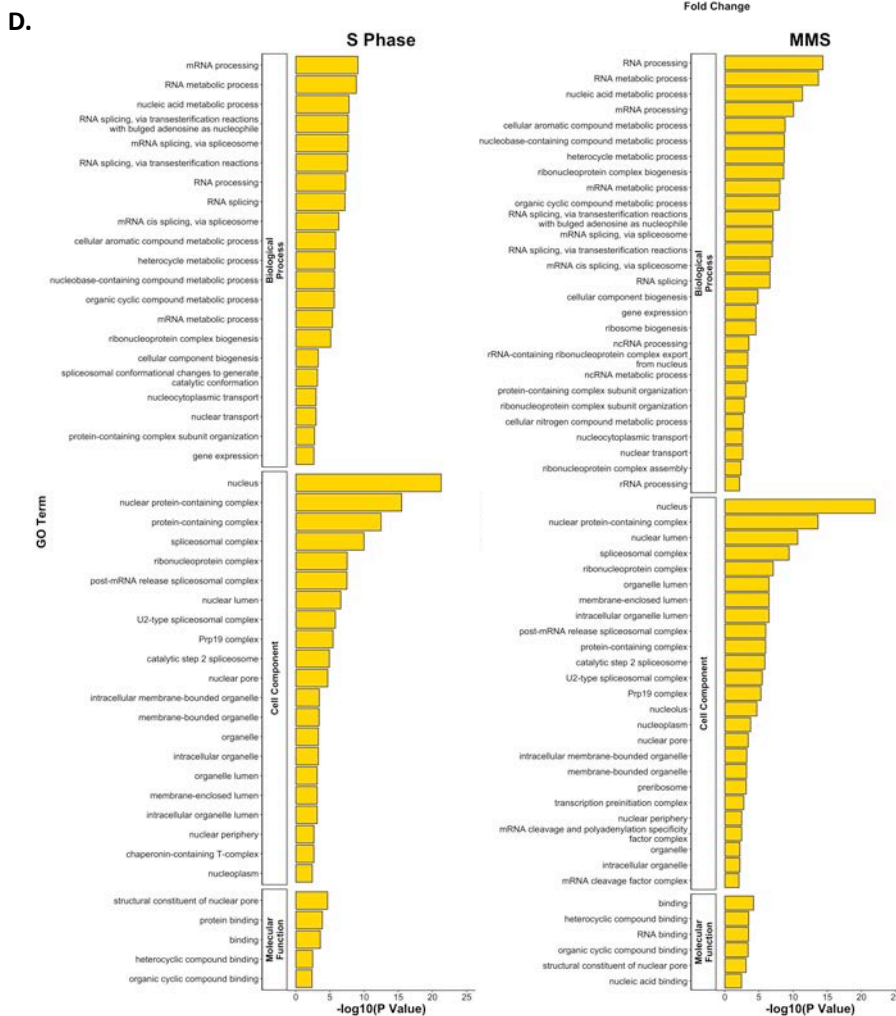

1019  
1020  
1021  
1022  
1023  
1024  
1025

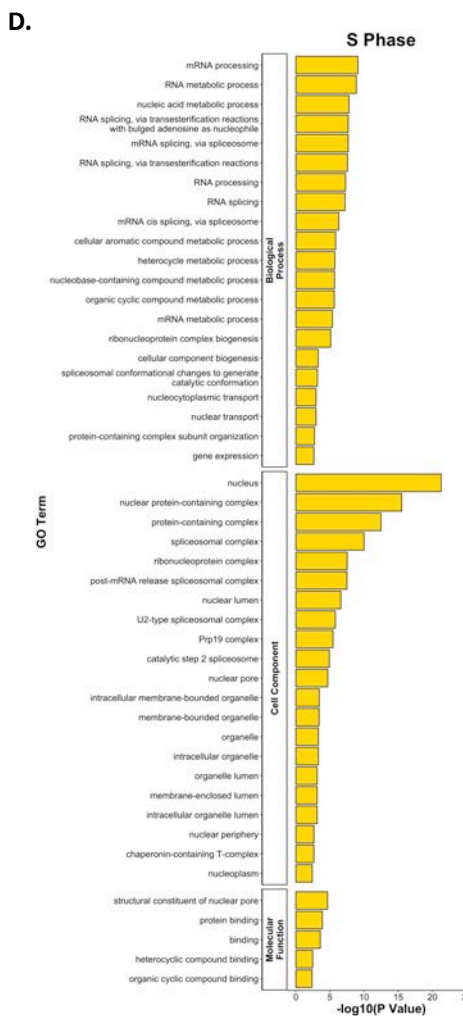

1026  
1027  
1028  
1029  
1030  
1031  
1032

1033  
1034  
1035  
1036  
1037  
1038  
1039

**Figure S2. Proximal Proteins of Rtf2 identified via TurboID Proximity Based Labelling Mass Spectrometry. A.** The presence of Rtf2-3HA-BirA<sup>TbID</sup> does not reduce cell viability in the presence of MMS to that of *rtf2Δ*. Cells were spotted onto plates in 10x serial dilutions and incubated at 30°C for 4 days. **B.** FACS analysis of cells synchronised in G2 and S phase using the *cdc2asM17* ATP-sensitive allele. **C.** Volcano plot of mass spectrometry protein hits. Proteins are plotted as *p* value against fold change calculated using Welch's T-test. **D.** GO Term analysis of significant protein hits (*p* < 0.01) with a fold change of > 2.

1040 SUP FIG 3

1041

1042

1043

1044

1045

1046

1047

1048

1049

1050

1051

1052

1053

1054

1055

1056

1057

1058

1059

1060

1061

1062

1063

1064

1065

1066

1067

1068

1069

1070

1071

1072

1073

1074

1075

1076

1077

1078

1079

1080

1081

1082

1083

1084

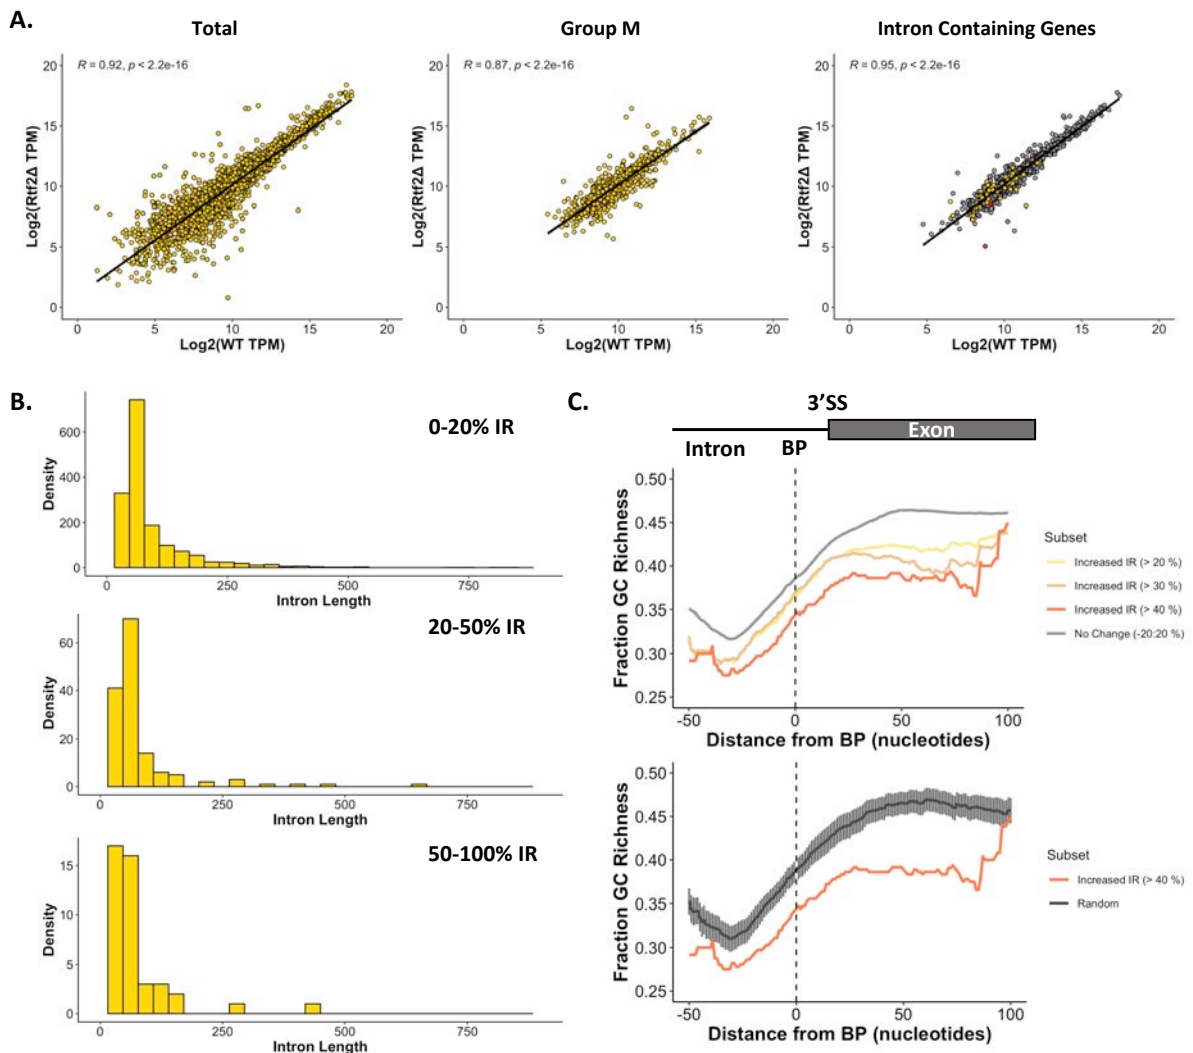

**Figure S3. cDNA-Seq Analysis of Retained Introns.** **A.** Gene expression analysis between  $\text{rtf}2^+$  and  $\text{rtf}2\Delta$  samples using TPM (Transcripts Per Million) as calculated by GffCompare. Spearman's Rank correlation coefficient and associated  $p$  value are shown. *Left graph:* Total transcripts; *Middle graph:* Transcripts classified as Type 'm' by GffCompare; *Right graph:* Intron containing transcripts ( $\text{rtf}2\Delta > 20\%$  retention = yellow, WT  $> 20\%$  retention = red, no retention = grey). **B.** Histogram of intron length for introns retained (IR) at the indicated percentage for  $\text{rtf}2\Delta$  samples. **C.** Rolling average of GC richness (rolling window of 40 bp) for introns and the following exon aligned around the centre of the branch point (BP) motif. *Top graph:* different subsets of intron:exon sequences based on difference in intron retention (IR;  $\text{rtf}2\Delta - \text{WT}$ ); *Bottom graph:* Random represents GC richness of 100 random intron:exon sequences with error bars representing the 95% confidence intervals.

1085 SUP FIG 4

1086

1087

1088

1089

1090

1091

1092

1093

1094

1095

1096

1097

1098

1099

1100

1101

1102

1103

1104

1105

1106

1107

1108

1109

1110

1111

1112

1113

1114

1115

1116

1117

1118

1119

1120

1121

1122

1123

1124

1125

1126

1127

1128

1129

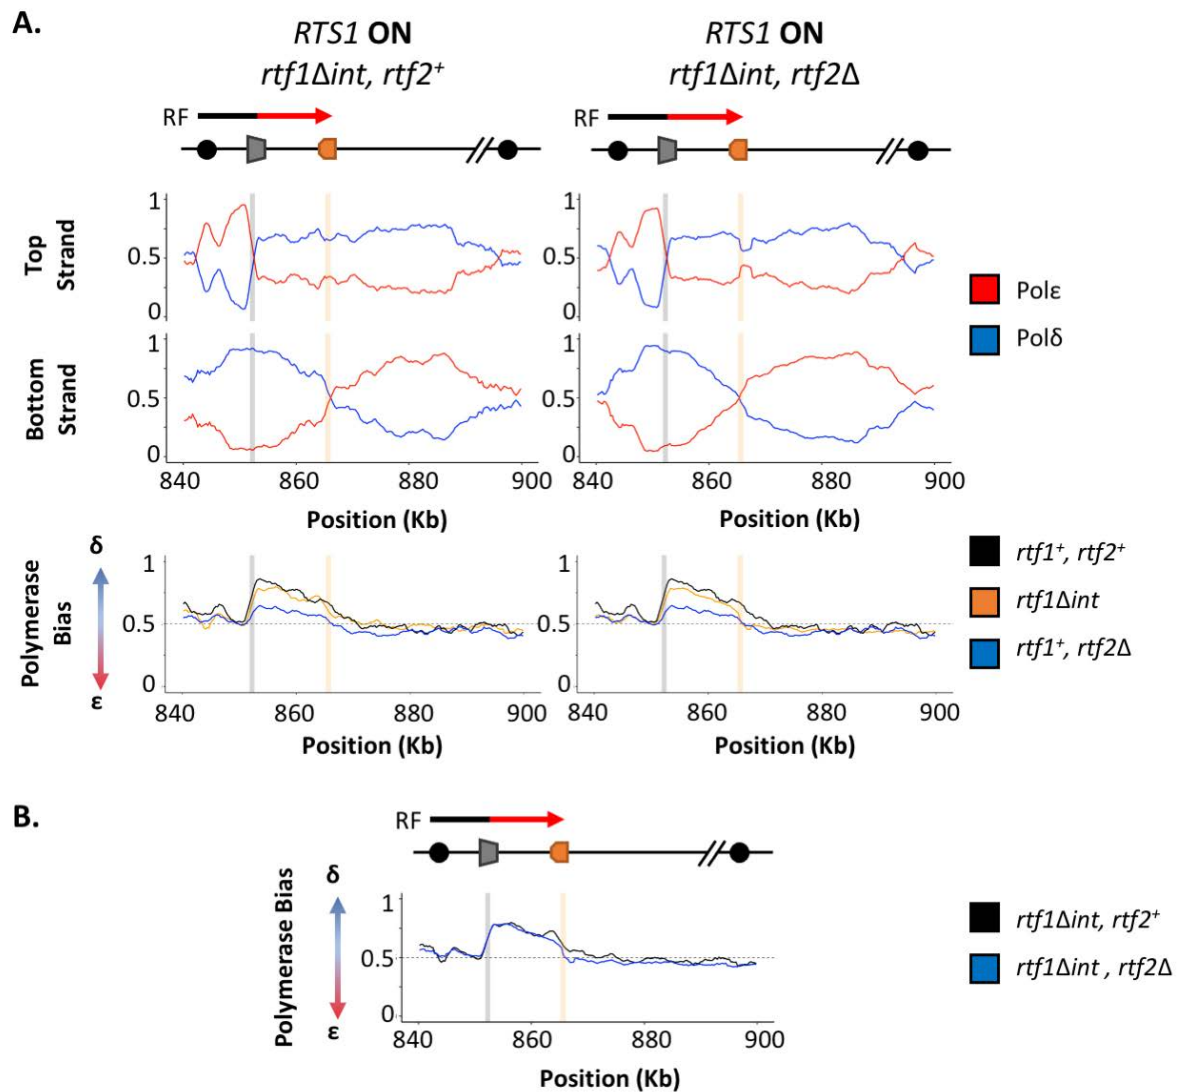

Source: https://www.biorxiv.org/content/10.1101/2022.03.10.483798v1.full.pdf
