# Supplementary material for: S. pombe Rtf2 is Important for Replication Fork Barrier Activity of RTS1 via Splicing of Rtf1
Source: bioRxiv preprint, doi:10.1101/2022.03.10.483798, version 1 (2022-03-10)
Supplement: STab1 [file 483798_file02.xlsx]

## Sheet: S Phase
Protein IDs	Gene names	Fasta headers	LFQ intensity WT rep1	LFQ intensity WT_rep2	LFQ intensity WT rep3	LFQ intensity rtf2-TurboID rep1	LFQ intensity rtf2-TurboID rep2	LFQ intensity 5C rtf2-TurboID rep3	Unique peptides	Sequence coverage [%]	Mol. weight [kDa]	MS/MS count	-Log Welch's T-test p-value	Welch's T-test Difference
O13651	irs1	sp|O13651|SYIC_SCHPO Isoleucine--tRNA ligase, cytoplasmic OS=Schizosaccharomyces pombe (strain 972 / ATCC 24843) OX=284812 GN=irs1 PE=3 SV=1	20.8308	21.2155	21.298	23.9987	23.4439	23.5391	7	7.1	122.91	15	3.39907	2.54578
O13768	ercc3	sp|O13768|ERCC3_SCHPO General transcription and DNA repair factor IIH helicase subunit XPB OS=Schizosaccharomyces pombe (strain 972 / ATCC 24843) OX=284812 GN=ptr8 PE=1 SV=1	21.184	21.0796	21.1906	28.4134	28.6076	28.4485	28	44.8	91.344	131	6.17598	7.33838
O13788	ssr1	sp|O13788|SSR1_SCHPO SWI/SNF and RSC complexes subunit ssr1 OS=Schizosaccharomyces pombe (strain 972 / ATCC 24843) OX=284812 GN=ssr1 PE=1 SV=1	22.1933	21.2526	21.7695	23.2444	23.2091	23.8709	5	12.3	59.638	14	2.04092	1.703
O13831	trp2	sp|O13831|TRP_SCHPO Tryptophan synthase OS=Schizosaccharomyces pombe (strain 972 / ATCC 24843) OX=284812 GN=trp2 PE=2 SV=1	25.4251	25.6779	25.054	27.0098	27.0005	26.8082	15	38.6	75.436	108	2.13371	1.55382
O13874	SPAC1B3.09c	sp|O13874|YE19_SCHPO Uncharacterized NOC2 family protein C1B3.09c OS=Schizosaccharomyces pombe (strain 972 / ATCC 24843) OX=284812 GN=SPAC1B3.09c PE=3 SV=1	21.1897	22.5774	21.3931	29.715	29.8449	29.851	18	39.2	60.786	137	2.58156	8.08358
O13919	pst2	sp|O13919|PST2_SCHPO Paired amphipathic helix protein pst2 OS=Schizosaccharomyces pombe (strain 972 / ATCC 24843) OX=284812 GN=pst2 PE=1 SV=1	21.6449	21.6135	21.3562	23.0032	23.4927	23.1817	4	5.2	124.85	5	2.90413	1.68763
O13936	spt5	sp|O13936|SPT5_SCHPO Transcription elongation factor spt5 OS=Schizosaccharomyces pombe (strain 972 / ATCC 24843) OX=284812 GN=spt5 PE=1 SV=1	20.9978	19.8627	20.274	27.6478	27.3787	27.8065	18	27.6	109.01	73	3.17217	7.23288
O13971	sgd1	sp|O13971|SGD1_SCHPO Suppressor of glycerol defect protein 1 OS=Schizosaccharomyces pombe (strain 972 / ATCC 24843) OX=284812 GN=sgd1 PE=3 SV=1	20.3036	21.6283	21.1814	24.3725	25.1883	24.806	7	11.6	87.87	23	2.58195	3.75113
O13986	SPAC26H5.04	sp|O13986|YEG4_SCHPO Uncharacterized protein C26H5.04 OS=Schizosaccharomyces pombe (strain 972 / ATCC 24843) OX=284812 GN=SPAC26H5.04 PE=4 SV=3	20.9578	21.8447	20.1006	24.6606	24.3155	24.4292	7	13.1	90.407	12	1.77077	3.50078
O14011	prp19	sp|O14011|PRP19_SCHPO Pre-mRNA-processing factor 19 OS=Schizosaccharomyces pombe (strain 972 / ATCC 24843) OX=284812 GN=prp19 PE=1 SV=1	21.8051	21.3666	22.2548	25.1092	25.4575	25.2294	4	17	54.191	20	2.68272	3.45655
O14161	cwf21	sp|O14161|CWC21_SCHPO Pre-mRNA-splicing factor cwf21 OS=Schizosaccharomyces pombe (strain 972 / ATCC 24843) OX=284812 GN=cwf21 PE=1 SV=2	20.6154	21.2003	21.0677	25.1598	24.6433	25.0348	3	19.8	34.553	10	4.09439	3.98479
O14174	spt20	sp|O14174|SPT20_SCHPO SAGA complex subunit spt20 OS=Schizosaccharomyces pombe (strain 972 / ATCC 24843) OX=284812 GN=spt20 PE=1 SV=1	21.9004	19.8784	20.2785	25.0464	25.1966	25.2935	7	14.8	54.028	22	1.7609	4.4931
O14293	SPAC9E9.09c	sp|O14293|YF19_SCHPO Putative aldehyde dehydrogenase-like protein C9E9.09c OS=Schizosaccharomyces pombe (strain 972 / ATCC 24843) OX=284812 GN=SPAC9E9.09c PE=1 SV=1	27.1393	27.3496	27.2243	28.2292	28.4981	28.3778	17	53.3	54.768	174	3.34793	1.13066
O14310	npp106	sp|O14310|NP106_SCHPO Nucleoporin npp106 OS=Schizosaccharomyces pombe (strain 972 / ATCC 24843) OX=284812 GN=npp106 PE=1 SV=1	20.997	22.348	21.1888	27.0415	27.3364	27.3341	17	27.7	105.71	60	2.42363	5.72607
O14339	rpl1701	sp|O14339|RL17A_SCHPO 60S ribosomal protein L17-A OS=Schizosaccharomyces pombe (strain 972 / ATCC 24843) OX=284812 GN=rpl1701 PE=3 SV=1	23.3795	24.0136	24.1479	26.166	26.4926	26.1544	2	27.8	20.814	18	2.47783	2.42396
O14370	eca39	sp|O14370|BCA1_SCHPO Branched-chain-amino-acid aminotransferase, mitochondrial OS=Schizosaccharomyces pombe (strain 972 / ATCC 24843) OX=284812 GN=eca39 PE=1 SV=3	24.6836	24.8259	24.8329	26.1222	26.7186	26.3396	7	23.9	47.855	46	2.11128	1.61263
O42643	prp22	sp|O42643|PRP22_SCHPO Pre-mRNA-splicing factor ATP-dependent RNA helicase prp22 OS=Schizosaccharomyces pombe (strain 972 / ATCC 24843) OX=284812 GN=prp22 PE=1 SV=1	21.0018	21.2499	20.8195	28.9877	29.1365	29.277	23	29.2	131.49	135	5.50481	8.10996
O42897	rpn3	sp|O42897|RPN3_SCHPO Probable 26S proteasome regulatory subunit rpn3 OS=Schizosaccharomyces pombe (strain 972 / ATCC 24843) OX=284812 GN=rpn3 PE=3 SV=2	20.9386	21.3905	20.0523	25.3971	25.7979	25.3591	9	22.3	57.346	19	2.48627	4.72423
O42963	nup44	sp|O42963|NUP44_SCHPO Nucleoporin nup44 OS=Schizosaccharomyces pombe (strain 972 / ATCC 24843) OX=284812 GN=nup44 PE=2 SV=1	20.4812	20.8619	20.5782	25.0781	24.6952	25.1895	8	31.3	44.483	25	4.4453	4.34716
O43030	fes1	sp|O43030|FES1_SCHPO Hsp70 nucleotide exchange factor fes1 OS=Schizosaccharomyces pombe (strain 972 / ATCC 24843) OX=284812 GN=fes1 PE=1 SV=1	20.831	22.0081	21.0779	24.5743	23.7011	24.9808	6	27.9	32.744	9	2.40202	3.11308
O43051	nop14	sp|O43051|NOP14_SCHPO Probable nucleolar complex protein 14 OS=Schizosaccharomyces pombe (strain 972 / ATCC 24843) OX=284812 GN=nop14 PE=1 SV=1	21.6519	20.8165	20.8994	28.7929	28.7736	28.8948	15	21.8	95.151	85	3.00951	7.69779
O59702	clr6	sp|O59702|CLR6_SCHPO Histone deacetylase clr6 OS=Schizosaccharomyces pombe (strain 972 / ATCC 24843) OX=284812 GN=clr6 PE=1 SV=1	21.1229	20.6795	20.3499	24.9799	25.2129	24.9618	10	31.6	46.111	41	3.00734	4.33414
O59730	fma1	sp|O59730|MAP1_SCHPO Methionine aminopeptidase 1 OS=Schizosaccharomyces pombe (strain 972 / ATCC 24843) OX=284812 GN=fma1 PE=1 SV=1	21.3356	20.9964	19.5767	24.5291	25.8521	24.6178	5	23.7	42.139	19	2.42687	4.36347
O59787	srp72	sp|O59787|SRP72_SCHPO Signal recognition particle subunit srp72 OS=Schizosaccharomyces pombe (strain 972 / ATCC 24843) OX=284812 GN=srp72 PE=3 SV=1	21.7016	21.3978	22.1167	24.552	24.4906	24.7479	12	28	63.28	32	2.65504	2.85813
O59793	bis1	sp|O59793|ESS2_SCHPO Stress response protein bis1 OS=Schizosaccharomyces pombe (strain 972 / ATCC 24843) OX=284812 GN=bis1 PE=1 SV=1	21.4501	21.2624	21.3472	24.0732	24.6577	24.3081	5	21.6	43.023	21	2.82297	2.9931
O59855	ssa2	sp|O59855|HSP72_SCHPO Probable heat shock protein ssa2 OS=Schizosaccharomyces pombe (strain 972 / ATCC 24843) OX=284812 GN=ssa2 PE=1 SV=3;sp|Q10265|HSP71_SCHPO Probable heat shock protein ssa1 OS=Schizosaccharomyces pombe (strain 972 / ATCC 24843) OX=28481	28.5607	28.5746	28.8978	29.4396	29.2465	29.4837	24	50.5	70.232	293	2.07095	0.712226
O60070	ash2	sp|O60070|ASH2_SCHPO Set1 complex component ash2 OS=Schizosaccharomyces pombe (strain 972 / ATCC 24843) OX=284812 GN=ash2 PE=4 SV=1	21.1478	21.51	21.2537	27.0104	26.0187	26.664	12	25.5	74.252	50	2.95362	5.26053
O60145	ppk23	sp|O60145|PPK23_SCHPO Serine/threonine-protein kinase ppk23 OS=Schizosaccharomyces pombe (strain 972 / ATCC 24843) OX=284812 GN=ppk23 PE=3 SV=1	21.471	20.8381	24.8819	30.256	28.8089	30.3075	18	52	46.123	125	1.76432	7.39383
O60155	prs1	sp|O60155|PRS1_SCHPO Putative proline--tRNA ligase C19C7.06 OS=Schizosaccharomyces pombe (strain 972 / ATCC 24843) OX=284812 GN=prs1 PE=3 SV=1	22.7951	22.6441	22.9333	24.1352	24.3502	23.9424	6	13.8	78.874	18	2.93073	1.35174
O74341	cct3	sp|O74341|TCPG_SCHPO T-complex protein 1 subunit gamma OS=Schizosaccharomyces pombe (strain 972 / ATCC 24843) OX=284812 GN=cct3 PE=1 SV=1	21.2586	20.3945	21.1058	26.05	26.0009	26.3483	9	18.8	58.48	24	3.12453	5.21346
O74485	SPCC1906.02c	sp|O74485|CUE3_SCHPO CUE domain-containing protein 3 OS=Schizosaccharomyces pombe (strain 972 / ATCC 24843) OX=284812 GN=SPCC1906.02c PE=1 SV=1	20.8147	21.3698	21.685	28.745	28.6281	28.757	10	19.8	65.857	81	3.04142	7.4202
O74511	ekc1	sp|O74511|EKC1_SCHPO Extragenic suppressor of kinetochore protein 1 OS=Schizosaccharomyces pombe (strain 972 / ATCC 24843) OX=284812 GN=ekc1 PE=1 SV=2	21.4545	21.1396	21.9556	27.1314	27.1043	27.1437	12	21.1	94.966	62	2.75689	5.60995
O74563	brl2	sp|O74563|BRL2_SCHPO E3 ubiquitin-protein ligase brl2 OS=Schizosaccharomyces pombe (strain 972 / ATCC 24843) OX=284812 GN=brl2 PE=1 SV=1	21.2603	20.4666	20.6971	24.0435	24.0361	24.466	6	10.4	78.052	8	3.1275	3.37384
O74740	cft2	sp|O74740|CFT2_SCHPO Cleavage factor two protein 2 OS=Schizosaccharomyces pombe (strain 972 / ATCC 24843) OX=284812 GN=cft2 PE=1 SV=1	22.0243	21.2719	21.7274	25.106	25.117	25.0239	9	14.2	89.45	17	2.44495	3.40775
O74828	esf1	sp|O74828|ESF1_SCHPO Pre-rRNA-processing protein esf1 OS=Schizosaccharomyces pombe (strain 972 / ATCC 24843) OX=284812 GN=esf1 PE=1 SV=1	20.3452	20.8037	21.1195	25.5743	25.0942	25.6611	6	12.9	77.753	24	3.92982	4.68709
O74905	rpl902	sp|O74905|RL9B_SCHPO 60S ribosomal protein L9-B OS=Schizosaccharomyces pombe (strain 972 / ATCC 24843) OX=284812 GN=rpl902 PE=3 SV=1	26.5055	26.273	26.2011	25.6881	25.7233	25.5019	2	27.5	21.382	45	2.30672	-0.688754
O74958	mmi1	sp|O74958|MMI1_SCHPO RNA binding exosome specificity factor Mmi1 OS=Schizosaccharomyces pombe (strain 972 / ATCC 24843) OX=284812 GN=mmi1 PE=1 SV=3	22.0478	21.7219	22.0066	25.7366	26.024	25.9377	5	19.1	54.538	27	4.99245	3.97401
O75005	vas2	sp|O75005|SYV_SCHPO Valine--tRNA ligase OS=Schizosaccharomyces pombe (strain 972 / ATCC 24843) OX=284812 GN=vas2 PE=3 SV=1	23.9776	24.4432	24.3225	25.5647	25.5096	25.9054	15	21.2	111.32	48	2.76327	1.41211
O94246	SPCC737.06c	sp|O94246|GSH0_SCHPO Putative glutamate--cysteine ligase regulatory subunit OS=Schizosaccharomyces pombe (strain 972 / ATCC 24843) OX=284812 GN=SPCC737.06c PE=3 SV=1	21.0075	21.7949	20.7199	23.6318	23.6134	23.3236	3	17.1	32.66	13	1.91152	2.34881
O94308	csn1	sp|O94308|CSN1_SCHPO COP9 signalosome complex subunit 1 OS=Schizosaccharomyces pombe (strain 972 / ATCC 24843) OX=284812 GN=csn1 PE=1 SV=1	21.7664	20.1125	20.847	25.0875	25.2955	25.1346	5	14	48.657	13	1.94696	4.26392
O94374	imp1	sp|O94374|IMA2_SCHPO Importin subunit alpha-2 OS=Schizosaccharomyces pombe (strain 972 / ATCC 24843) OX=284812 GN=imp1 PE=1 SV=1	20.3143	19.5778	20.3108	24.1575	24.4428	24.3211	5	16.1	59.852	12	2.83935	4.23954
O94416	tfg1	sp|O94416|T2FA_SCHPO Transcription initiation factor IIF subunit alpha OS=Schizosaccharomyces pombe (strain 972 / ATCC 24843) OX=284812 GN=tfg1 PE=1 SV=2	20.9163	21.8621	20.1433	25.279	25.4484	25.5096	9	24.3	61.611	23	1.95302	4.4384
O94418	mug87	sp|O94418|MUG87_SCHPO Meiotically up-regulated gene 87 protein OS=Schizosaccharomyces pombe (strain 972 / ATCC 24843) OX=284812 GN=mug87 PE=1 SV=1	21.8432	21.4832	20.5539	23.9871	24.3477	24.0195	6	8.8	97.563	15	1.90686	2.8247
O94514	nop56	sp|O94514|NOP56_SCHPO Nucleolar protein 56 OS=Schizosaccharomyces pombe (strain 972 / ATCC 24843) OX=284812 GN=nop56 PE=3 SV=1	20.3381	21.76	22.0712	26.5376	26.9647	27.0036	10	31	55.388	39	2.20845	5.44549
O94538	snu66	sp|O94538|SNU66_SCHPO U4/U6.U5 tri-snRNP-associated protein snu66 OS=Schizosaccharomyces pombe (strain 972 / ATCC 24843) OX=284812 GN=snu66 PE=1 SV=1	20.616	20.7772	21.5297	25.1127	25.2103	25.7498	5	13.6	74.733	20	3.39	4.38329
O94609	ptr3	sp|O94609|UBA1_SCHPO Ubiquitin-activating enzyme E1 1 OS=Schizosaccharomyces pombe (strain 972 / ATCC 24843) OX=284812 GN=ptr3 PE=1 SV=1	20.2379	20.3501	20.7611	23.4047	23.2273	22.9848	5	6.3	112.95	6	3.61687	2.7559
O94620	cwf17	sp|O94620|CWF17_SCHPO Pre-mRNA-splicing factor cwf17 OS=Schizosaccharomyces pombe (strain 972 / ATCC 24843) OX=284812 GN=cwf17 PE=1 SV=1	21.8149	23.1251	22.1956	25.0617	26.0395	25.848	7	36.2	37.427	31	2.48201	3.27121
O94756	meu14	sp|O94756|MEU14_SCHPO Meiotic expression up-regulated protein 14 OS=Schizosaccharomyces pombe (strain 972 / ATCC 24843) OX=284812 GN=meu14 PE=4 SV=1	19.7804	21.5221	21.6611	26.3062	26.0267	26.4444	4	15.5	37.392	9	1.97789	5.27125
P12000	cdc17	sp|P12000|DNLI1_SCHPO DNA ligase 1 OS=Schizosaccharomyces pombe (strain 972 / ATCC 24843) OX=284812 GN=cdc17 PE=3 SV=1	22.1993	21.0854	20.9349	27.7459	27.869	27.7286	17	38.3	86.58	77	2.44976	6.37465
P14068	crm1	sp|P14068|XPO1_SCHPO Exportin-1 OS=Schizosaccharomyces pombe (strain 972 / ATCC 24843) OX=284812 GN=xpo1 PE=1 SV=3	20.0566	21.155	20.1454	24.4505	24.3355	24.5996	6	4.6	123.57	14	2.23972	4.00953
P18869	leu1	sp|P18869|LEU3_SCHPO 3-isopropylmalate dehydrogenase OS=Schizosaccharomyces pombe (strain 972 / ATCC 24843) OX=284812 GN=leu1 PE=1 SV=1	19.9349	21.0509	20.1912	26.8696	27.3815	27.3223	8	36.7	39.732	44	3.32724	6.79883
P36603	suc22	sp|P36603|RIR2_SCHPO Ribonucleoside-diphosphate reductase small chain OS=Schizosaccharomyces pombe (strain 972 / ATCC 24843) OX=284812 GN=suc22 PE=3 SV=2	25.7602	25.6627	25.6687	26.295	26.3348	26.1914	10	36.3	45.405	99	3.20091	0.576551
P39964	cdc5	sp|P39964|CEF1_SCHPO Pre-mRNA-splicing factor cdc5 OS=Schizosaccharomyces pombe (strain 972 / ATCC 24843) OX=284812 GN=cdc5 PE=1 SV=1	21.0356	21.9039	22.0632	27.2908	27.1569	27.5571	18	40.2	86.843	83	2.92836	5.66736
P40847	sap1	sp|P40847|SAP1_SCHPO Switch-activating protein 1 OS=Schizosaccharomyces pombe (strain 972 / ATCC 24843) OX=284812 GN=sap1 PE=1 SV=2	20.918	19.7493	22.1463	26.0234	26.1836	26.4367	6	32.3	29.127	32	1.83491	5.27669
P48003	pht1	sp|P48003|H2AZ_SCHPO Histone H2A.Z OS=Schizosaccharomyces pombe (strain 972 / ATCC 24843) OX=284812 GN=pht1 PE=1 SV=3;sp|P04910|H2A2_SCHPO Histone H2A-beta OS=Schizosaccharomyces pombe (strain 972 / ATCC 24843) OX=284812 GN=hta2 PE=1 SV=2;sp|P04909|H2A1_SC	22.556	22.5652	22.7879	23.1038	22.9586	23.1973	2	11.5	15.025	13	1.91741	0.450192
P78773	acs1	sp|P78773|ACSA_SCHPO Probable acetyl-coenzyme A synthetase OS=Schizosaccharomyces pombe (strain 972 / ATCC 24843) OX=284812 GN=SPCC191.02c PE=1 SV=2	22.4287	22.5766	21.9684	26.7191	26.811	26.5745	17	35.6	73.035	68	3.27273	4.37693
P78794	cwf15	sp|P78794|CWC15_SCHPO Pre-mRNA-splicing factor cwf15 OS=Schizosaccharomyces pombe (strain 972 / ATCC 24843) OX=284812 GN=cwf15 PE=1 SV=2	20.8109	21.3888	21.8883	26.7483	26.226	26.8868	4	24.2	30.432	14	3.43468	5.25771
P78814	srp2	sp|P78814|SRP2_SCHPO Pre-mRNA-splicing factor srp2 OS=Schizosaccharomyces pombe (strain 972 / ATCC 24843) OX=284812 GN=srp2 PE=1 SV=2	21.0884	21.4418	20.8416	25.4244	25.6258	25.608	7	25.5	42.566	31	3.32542	4.42882
P78820	cut6	sp|P78820|ACAC_SCHPO Acetyl-CoA carboxylase OS=Schizosaccharomyces pombe (strain 972 / ATCC 24843) OX=284812 GN=cut6 PE=1 SV=2	38.8595	38.9413	38.6954	38.2314	38.4632	38.1266	172	75.6	256.84	19254	1.88847	-0.558375
P87058	sla1	sp|P87058|LAH1_SCHPO La protein homolog OS=Schizosaccharomyces pombe (strain 972 / ATCC 24843) OX=284812 GN=sla1 PE=1 SV=1	22.4315	22.0385	21.431	26.2202	25.4621	26.1619	7	32.6	34.616	32	3.26258	3.98105
P87115	SPAC20G8.09c	sp|P87115|NAT10_SCHPO RNA cytidine acetyltransferase OS=Schizosaccharomyces pombe (strain 972 / ATCC 24843) OX=284812 GN=nat10 PE=1 SV=1	22.4976	20.8976	21.6473	25.5046	25.6503	25.4954	13	19.5	116.46	32	1.88015	3.8693
P87126	cwf2	sp|P87126|CWC2_SCHPO Pre-mRNA-splicing factor cwf2 OS=Schizosaccharomyces pombe (strain 972 / ATCC 24843) OX=284812 GN=cwf2 PE=1 SV=2	21.1133	20.4066	21.3754	25.7462	25.8321	25.8695	7	32	44.281	24	2.50388	4.85088
P87137	SPAC57A7.06	sp|P87137|YDM6_SCHPO Uncharacterized protein C57A7.06 OS=Schizosaccharomyces pombe (strain 972 / ATCC 24843) OX=284812 GN=SPAC57A7.06 PE=1 SV=1	22.3009	21.1687	20.9608	27.7309	27.3821	27.8378	7	9	105.06	29	2.6631	6.17348
P87312	cwf4	sp|P87312|CLF1_SCHPO Pre-mRNA-splicing factor cwf4 OS=Schizosaccharomyces pombe (strain 972 / ATCC 24843) OX=284812 GN=cwf4 PE=1 SV=1	20.2522	20.3935	21.8886	31.1604	31.3303	30.9835	24	43.6	80.84	215	2.72039	10.3133
Q09116	spn2	sp|Q09116|SPN2_SCHPO Septin homolog spn2 OS=Schizosaccharomyces pombe (strain 972 / ATCC 24843) OX=284812 GN=spn2 PE=1 SV=2	21.0424	22.0259	20.6717	25.8232	25.6518	26.5586	8	39.6	38.129	14	2.95407	4.76451
Q09179	gln1	sp|Q09179|GLNA_SCHPO Glutamine synthetase OS=Schizosaccharomyces pombe (strain 972 / ATCC 24843) OX=284812 GN=gln1 PE=1 SV=2	20.9971	21.6489	21.2485	23.6551	23.7625	23.9961	3	13.4	40.018	14	2.89786	2.5064
Q09671	SPAC5H10.10	sp|Q09671|OYEB_SCHPO Putative NADPH dehydrogenase C5H10.10 OS=Schizosaccharomyces pombe (strain 972 / ATCC 24843) OX=284812 GN=SPAC5H10.10 PE=3 SV=1	20.8559	20.7937	19.4421	25.1972	25.8005	25.4055	9	30.9	44.983	19	2.43835	5.10382
Q09676	SPAC5H10.03	sp|Q09676|YA03_SCHPO Probable phosphatase SPAC5H10.03 OS=Schizosaccharomyces pombe (strain 972 / ATCC 24843) OX=284812 GN=SPAC5H10.03 PE=3 SV=1	21.2547	20.8734	22.422	25.2403	24.7063	25.8237	6	38.8	24.716	20	2.38978	3.74003
Q09736	erg11	sp|Q09736|CP51_SCHPO Lanosterol 14-alpha demethylase erg11 OS=Schizosaccharomyces pombe (strain 972 / ATCC 24843) OX=284812 GN=erg11 PE=1 SV=1	23.7059	23.5801	24.219	25.4871	25.427	25.6901	6	18.6	56.331	23	2.20625	1.69976
Q09750	pst1	sp|Q09750|PST1_SCHPO Paired amphipathic helix protein pst1 OS=Schizosaccharomyces pombe (strain 972 / ATCC 24843) OX=284812 GN=pst1 PE=1 SV=1	20.1666	21.1953	20.865	26.623	27.504	27.4797	17	14.1	171.45	37	3.97838	6.45992
Q09757	rps9a	sp|Q09757|RS9A_SCHPO 40S ribosomal protein S9-A OS=Schizosaccharomyces pombe (strain 972 / ATCC 24843) OX=284812 GN=rps901 PE=1 SV=2;sp|O59675|RS9B_SCHPO 40S ribosomal protein S9-B OS=Schizosaccharomyces pombe (strain 972 / ATCC 24843) OX=284812 GN=rps902	26.5245	26.1184	26.5084	27.1903	27.3271	27.1939	8	31.9	22.161	75	1.80927	0.853331
Q09793	nup45	sp|Q09793|NUP45_SCHPO Nucleoporin nup45 OS=Schizosaccharomyces pombe (strain 972 / ATCC 24843) OX=284812 GN=nup45 PE=1 SV=2	21.4372	21.476	21.8055	23.5163	23.8094	24.1186	4	12.5	44.983	13	3.0703	2.2419
Q09799	kri1	sp|Q09799|KRI1_SCHPO Protein kri1 OS=Schizosaccharomyces pombe (strain 972 / ATCC 24843) OX=284812 GN=kri1 PE=1 SV=1	22.6561	21.0069	21.3979	29.6479	29.4005	29.5853	18	42.1	69.523	122	2.47076	7.85762
Q09813	SPAC2G11.14	sp|Q09813|T111_SCHPO Putative transcription initiation factor TFIID 111 kDa subunit OS=Schizosaccharomyces pombe (strain 972 / ATCC 24843) OX=284812 GN=SPAC2G11.14 PE=1 SV=1	21.8696	20.5806	22.0087	26.0206	26.2799	26.2946	9	12.8	111.01	24	2.13127	4.71206
Q09882	prp45	sp|Q09882|PRP45_SCHPO Pre-mRNA-processing protein 45 OS=Schizosaccharomyces pombe (strain 972 / ATCC 24843) OX=284812 GN=prp45 PE=1 SV=1	21.7071	21.7811	22.9944	28.3006	28.4618	28.5774	13	32.1	62.696	64	2.47298	6.28572
Q09898	sid2	sp|Q09898|SID2_SCHPO Serine/threonine-protein kinase sid2 OS=Schizosaccharomyces pombe (strain 972 / ATCC 24843) OX=284812 GN=sid2 PE=1 SV=1	21.6661	19.8743	21.2786	24.6004	24.8468	24.3784	5	11.2	70.491	10	1.77731	3.66883
Q09904	nup124	sp|Q09904|NU124_SCHPO Nucleoporin nup124 OS=Schizosaccharomyces pombe (strain 972 / ATCC 24843) OX=284812 GN=nup124 PE=1 SV=1	20.9896	21.8134	22.5971	29.8554	29.9491	30.2323	27	35.5	123.97	184	2.69558	8.21222
Q09928	cyp8	sp|Q09928|PPIL2_SCHPO Peptidyl-prolyl cis-trans isomerase cyp8 OS=Schizosaccharomyces pombe (strain 972 / ATCC 24843) OX=284812 GN=cyp8 PE=2 SV=3	20.1402	20.3436	20.1804	23.6886	24.1992	24.0643	5	12	58.625	13	3.38578	3.76263
Q10143	SPAC3H8.07c	sp|Q10143|PFD3_SCHPO Probable prefoldin subunit 3 OS=Schizosaccharomyces pombe (strain 972 / ATCC 24843) OX=284812 GN=SPAC3H8.07c PE=3 SV=1	21.8437	20.7663	21.2326	25.182	25.1316	25.071	4	21.9	19.445	8	2.21602	3.84729
Q10147	cct2	sp|Q10147|TCPB_SCHPO Probable T-complex protein 1 subunit beta OS=Schizosaccharomyces pombe (strain 972 / ATCC 24843) OX=284812 GN=cct2 PE=3 SV=1	20.9623	21.0354	20.4148	24.8603	24.631	25.1474	8	23.7	56.676	11	3.9082	4.07537
Q10154	rtf2	sp|Q10154|RTF2_SCHPO Replication termination factor 2 OS=Schizosaccharomyces pombe (strain 972 / ATCC 24843) OX=284812 GN=rtf2 PE=1 SV=1	21.7844	21.5527	20.6904	29.8531	30.077	30.0198	13	54.6	27.057	130	2.99307	8.6408
Q10168	nsp1	sp|Q10168|NSP1_SCHPO Nucleoporin nsp1 OS=Schizosaccharomyces pombe (strain 972 / ATCC 24843) OX=284812 GN=nsp1 PE=1 SV=1	20.9227	21.5978	21.9455	26.9096	26.9812	27.0439	18	59	60.73	74	2.58369	5.48956
Q10752	cdc28	sp|Q10752|CDC28_SCHPO Pre-mRNA-splicing factor ATP-dependent RNA helicase-like protein cdc28 OS=Schizosaccharomyces pombe (strain 972 / ATCC 24843) OX=284812 GN=cdc28 PE=3 SV=2	20.7984	21.9039	21.9526	28.3655	28.5518	28.5158	22	28.4	121.22	107	2.60972	6.92608
Q8WZK0	usp107	sp|Q8WZK0|US107_SCHPO U1 snRNP-associated protein usp107 OS=Schizosaccharomyces pombe (strain 972 / ATCC 24843) OX=284812 GN=usp107 PE=1 SV=1	21.1321	21.2884	21.2776	25.1361	25.4934	25.2946	7	16.8	81.043	20	4.19006	4.07532
Q9C0Y6	SPAPB24D3.08c	sp|Q9C0Y6|YKM8_SCHPO Zinc-type alcohol dehydrogenase-like protein PB24D3.08c OS=Schizosaccharomyces pombe (strain 972 / ATCC 24843) OX=284812 GN=SPAPB24D3.08c PE=3 SV=1	21.429	21.4889	21.5004	26.7506	27.0685	27.4038	9	43.6	38.612	74	3.00563	5.60149
Q9HGL4	gcd10	sp|Q9HGL4|TRM6_SCHPO tRNA (adenine(58)-N(1))-methyltransferase non-catalytic subunit trm6 OS=Schizosaccharomyces pombe (strain 972 / ATCC 24843) OX=284812 GN=gcd10 PE=3 SV=1	21.429	20.5336	21.1481	24.6512	24.4898	25.0721	7	24.2	53.2	15	3.17317	3.70076
Q9HGL6	brx1	sp|Q9HGL6|BRX1_SCHPO Ribosome biogenesis protein brx1 OS=Schizosaccharomyces pombe (strain 972 / ATCC 24843) OX=284812 GN=brx1 PE=3 SV=1	20.5548	21.1837	21.6428	25.1718	25.1754	25.1302	5	16.3	33.899	15	2.22348	4.03205
Q9P6P7	SPAC644.16	sp|Q9P6P7|YKCG_SCHPO Uncharacterized RNA-binding protein C644.16 OS=Schizosaccharomyces pombe (strain 972 / ATCC 24843) OX=284812 GN=SPAC644.16 PE=4 SV=1	21.2306	21.0995	21.5178	26.4582	26.7244	27.1036	11	44.3	45.01	59	4.27518	5.47945
Q9P6R2	SPBC13E7.08c	sp|Q9P6R2|YOH8_SCHPO Uncharacterized protein C13E7.08c OS=Schizosaccharomyces pombe (strain 972 / ATCC 24843) OX=284812 GN=SPBC13E7.08c PE=3 SV=1	21.2944	20.8352	21.8815	26.1344	26.4167	26.4194	6	18.2	48.733	30	2.73952	4.98648
Q9P6R8	cwf24	sp|Q9P6R8|CWC24_SCHPO Pre-mRNA-splicing factor cwf24 OS=Schizosaccharomyces pombe (strain 972 / ATCC 24843) OX=284812 GN=cwf24 PE=1 SV=1	20.1091	21.3652	20.4596	23.3817	23.5314	23.7538	7	20.3	60.707	20	1.95119	2.91101
Q9P6R9	cwf22	sp|Q9P6R9|CWC22_SCHPO Pre-mRNA-splicing factor cwf22 OS=Schizosaccharomyces pombe (strain 972 / ATCC 24843) OX=284812 GN=cwf22 PE=1 SV=3	20.4766	22.0459	20.7922	26.3585	26.8618	26.8328	11	16.6	102.77	53	2.42614	5.57949
Q9P783	rrb1	sp|Q9P783|RRB1_SCHPO Ribosome assembly protein rrb1 OS=Schizosaccharomyces pombe (strain 972 / ATCC 24843) OX=284812 GN=rrb1 PE=1 SV=1	22.0109	21.3707	21.2339	23.346	23.8318	23.4726	3	8.8	53.834	10	2.39515	2.01164
Q9P785	SPBC1711.05	sp|Q9P785|YNY5_SCHPO LisH domain-containing protein C1711.05 OS=Schizosaccharomyces pombe (strain 972 / ATCC 24843) OX=284812 GN=SPBC1711.05 PE=4 SV=1	20.6494	22.0356	20.3024	25.0782	24.8392	25.197	5	15.3	47.427	14	1.85364	4.04233
Q9P7R9	cwf3	sp|Q9P7R9|SYF1_SCHPO Pre-mRNA-splicing factor cwf3 OS=Schizosaccharomyces pombe (strain 972 / ATCC 24843) OX=284812 GN=cwf3 PE=1 SV=1	21.1008	21.864	20.5028	25.6802	26.2445	25.7603	12	18	92.636	24	2.63845	4.73909
Q9P7S7	nop58	sp|Q9P7S7|NOP58_SCHPO Nucleolar protein 58 OS=Schizosaccharomyces pombe (strain 972 / ATCC 24843) OX=284812 GN=nop58 PE=1 SV=1	21.8679	22.1054	21.0011	27.419	27.68	27.5292	11	34.3	55.758	70	2.65868	5.88461
Q9UQW9	spe1	sp|Q9UQW9|DCOR_SCHPO Ornithine decarboxylase OS=Schizosaccharomyces pombe (strain 972 / ATCC 24843) OX=284812 GN=spe1 PE=2 SV=1	21.7589	20.0149	20.8891	28.2317	28.3868	28.8595	10	31	47.843	53	2.76543	7.60506
Q9URT2	SPCP25A2.03	sp|Q9URT2|YJU3_SCHPO Uncharacterized protein P25A2.03 OS=Schizosaccharomyces pombe (strain 972 / ATCC 24843) OX=284812 GN=SPCP25A2.03 PE=1 SV=1	21.6078	20.9068	20.8729	23.8499	24.0709	24.5801	6	12.4	85.239	10	3.12752	3.03777
Q9US06	SPAC664.03	sp|Q9US06|PAF1_SCHPO RNA polymerase II-associated protein 1 homolog OS=Schizosaccharomyces pombe (strain 972 / ATCC 24843) OX=284812 GN=SPAC664.03 PE=1 SV=2	21.7801	21.1637	21.5729	23.9488	23.9895	24.2271	3	11.8	51.189	6	2.88522	2.54955
Q9US25	hrp1	sp|Q9US25|HRP1_SCHPO Chromodomain helicase hrp1 OS=Schizosaccharomyces pombe (strain 972 / ATCC 24843) OX=284812 GN=hrp1 PE=1 SV=1	20.8799	21.2501	21.05	23.9281	24.2232	23.9058	7	6.3	158.55	11	4.42546	2.95906
Q9USG9	SPCP31B10.05	sp|Q9USG9|TYDP1_SCHPO Probable tyrosyl-DNA phosphodiesterase OS=Schizosaccharomyces pombe (strain 972 / ATCC 24843) OX=284812 GN=SPCP31B10.05 PE=3 SV=1	19.0799	21.4462	21.1501	26.7572	26.4982	27.0672	11	25.7	61.595	45	1.95419	6.21548
Q9USL4	nup61	sp|Q9USL4|NUP61_SCHPO Nucleoporin nup61 OS=Schizosaccharomyces pombe (strain 972 / ATCC 24843) OX=284812 GN=nup61 PE=1 SV=2	21.0483	20.5919	20.8678	26.1642	26.2313	26.2975	7	22.4	59.165	33	3.61314	5.39497
Q9UT24	brr2	sp|Q9UT24|BRR2_SCHPO Pre-mRNA-splicing factor brr2 OS=Schizosaccharomyces pombe (strain 972 / ATCC 24843) OX=284812 GN=brr2 PE=1 SV=1	20.5803	19.9475	21.1936	23.7194	23.7509	23.9116	6	3.9	248.81	12	1.97291	3.22017
Q9UT57	SPAC806.02c	sp|Q9UT57|CFD1_SCHPO Probable cytosolic Fe-S cluster assembly factor SPAC806.02c OS=Schizosaccharomyces pombe (strain 972 / ATCC 24843) OX=284812 GN=SPAC806.02c PE=3 SV=1	21.5688	20.0983	20.143	22.6613	23.4161	23.5114	5	13.5	67.68	11	1.77915	2.59289
Q9UTD1	yth1	sp|Q9UTD1|YTH1_SCHPO mRNA 3-end-processing protein yth1 OS=Schizosaccharomyces pombe (strain 972 / ATCC 24843) OX=284812 GN=yth1 PE=3 SV=1	21.1947	20.4764	20.6423	25.5575	25.4745	25.4753	3	25.9	19.379	12	2.73842	4.73127
Q9UTE3	seb1	sp|Q9UTE3|SEB1_SCHPO Rpb7-binding protein seb1 OS=Schizosaccharomyces pombe (strain 972 / ATCC 24843) OX=284812 GN=seb1 PE=1 SV=3	21.9186	20.785	20.4178	24.8309	25.1649	25.0628	6	18.1	66.439	24	2.00208	3.97907
Q9UTH9	dus3	sp|Q9UTH9|DUS3_SCHPO tRNA-dihydrouridine(47) synthase [NAD(P)(+)] OS=Schizosaccharomyces pombe (strain 972 / ATCC 24843) OX=284812 GN=dus3 PE=3 SV=1	20.9726	20.5079	22.3295	29.2289	29.4063	29.3842	24	51.1	69.698	127	2.37397	8.0698
Q9UTQ5	SPAC1071.09c	sp|Q9UTQ5|YL39_SCHPO Uncharacterized J domain-containing protein C1071.09c OS=Schizosaccharomyces pombe (strain 972 / ATCC 24843) OX=284812 GN=SPAC1071.09c PE=3 SV=1	21.0093	20.6191	20.9316	24.8183	24.7637	24.7527	4	18.4	32.85	19	3.16422	3.92493
Q9UUA7	SPBC409.17c	sp|Q9UUA7|YHAH_SCHPO UPF0590 protein C409.17c OS=Schizosaccharomyces pombe (strain 972 / ATCC 24843) OX=284812 GN=SPBC409.17c PE=3 SV=1	20.3786	20.2595	21.2361	24.9173	25.736	25.9305	6	41.9	25.747	20	3.44416	4.90323
Q9UUE5	nup85	sp|Q9UUE5|NUP85_SCHPO Nucleoporin nup85 OS=Schizosaccharomyces pombe (strain 972 / ATCC 24843) OX=284812 GN=nup85 PE=1 SV=1	20.4959	21.8611	22.8762	28.3486	28.3932	28.6037	17	37.8	78.021	106	2.0135	6.70411
Q9UUG8	tup12	sp|Q9UUG8|TUP12_SCHPO Transcriptional repressor tup12 OS=Schizosaccharomyces pombe (strain 972 / ATCC 24843) OX=284812 GN=tup12 PE=1 SV=2	20.2151	21.5355	21.8138	24.7482	24.413	24.6467	4	12	65.56	15	1.76679	3.4145
Q9UUI3	sap145	sp|Q9UUI3|SA145_SCHPO Pre-mRNA-splicing factor sap145 OS=Schizosaccharomyces pombe (strain 972 / ATCC 24843) OX=284812 GN=sap145 PE=1 SV=1	21.3734	21.3014	21.2189	26.123	25.6717	26.2307	7	18.3	69.184	23	3.1556	4.71059
Q9Y7Z1	nop16	sp|Q9Y7Z1|NOP16_SCHPO Nucleolar protein 16 OS=Schizosaccharomyces pombe (strain 972 / ATCC 24843) OX=284812 GN=nop16 PE=3 SV=1	21.1838	21.2674	21.6667	24.447	24.4767	25.0842	4	29.7	23.946	7	3.43574	3.29664
O14236	nog2	sp|O14236|NOG2_SCHPO Nucleolar GTP-binding protein 2 OS=Schizosaccharomyces pombe (strain 972 / ATCC 24843) OX=284812 GN=nog2 PE=1 SV=1	22.3063	20.1846	21.0194	25.1801	25.2028	25.3804	8	18.4	59.913	27	1.67478	4.08437
O74970	prp39	sp|O74970|PRP39_SCHPO Pre-mRNA-processing factor 39 OS=Schizosaccharomyces pombe (strain 972 / ATCC 24843) OX=284812 GN=prp39 PE=3 SV=1	20.232	20.8615	22.4806	25.6966	25.6721	25.5092	12	24.7	71.246	26	1.67017	4.43458
O94288	noc3	sp|O94288|NOC3_SCHPO Nucleolar complex-associated protein 3 OS=Schizosaccharomyces pombe (strain 972 / ATCC 24843) OX=284812 GN=noc3 PE=1 SV=1	22.5342	20.5157	22.4425	25.159	25.3302	25.3869	11	20.2	85.099	34	1.48007	3.46119
O94529	pob3	sp|O94529|POB3_SCHPO FACT complex subunit pob3 OS=Schizosaccharomyces pombe (strain 972 / ATCC 24843) OX=284812 GN=pob3 PE=3 SV=1	19.8571	22.071	21.0928	23.9021	24.2216	23.77	6	18.9	57.456	22	1.40951	2.95763
O94582	trp3	sp|O94582|TRPE_SCHPO Probable anthranilate synthase component 1 OS=Schizosaccharomyces pombe (strain 972 / ATCC 24843) OX=284812 GN=trp3 PE=1 SV=1	21.5958	22.5688	21.0852	22.7125	23.9882	23.9425	3	9.2	54.959	11	1.38913	1.79783
O94640	sir2	sp|O94640|SIR2_SCHPO NAD-dependent histone deacetylase sir2 OS=Schizosaccharomyces pombe (strain 972 / ATCC 24843) OX=284812 GN=sir2 PE=1 SV=2	21.0572	21.5831	24.8406	26.9364	27.3984	28.3896	16	53.9	53.442	74	1.42283	5.0812
P0CH07	ubi2	sp|P0CH07|RL402_SCHPO Ubiquitin-60S ribosomal protein L40 OS=Schizosaccharomyces pombe (strain 972 / ATCC 24843) OX=284812 GN=uep1 PE=1 SV=1;sp|P0CH06|RL401_SCHPO Ubiquitin-60S ribosomal protein L40 OS=Schizosaccharomyces pombe (strain 972 / ATCC 24843) OX	27.7939	27.3203	27.2728	27.985	28.2958	28.5468	3	27.3	14.595	50	1.6029	0.813555
P40374	his5	sp|P40374|HIS7_SCHPO Imidazoleglycerol-phosphate dehydratase OS=Schizosaccharomyces pombe (strain 972 / ATCC 24843) OX=284812 GN=his5 PE=1 SV=1	21.3373	22.0771	22.3689	23.2541	23.9841	23.0192	3	20.4	23.52	21	1.61288	1.49136
P56286	tif211	sp|P56286|IF2A_SCHPO Eukaryotic translation initiation factor 2 subunit alpha OS=Schizosaccharomyces pombe (strain 972 / ATCC 24843) OX=284812 GN=tif211 PE=1 SV=1	25.0762	24.1812	24.5643	26.0229	25.7606	25.4628	9	40.2	34.525	34	1.55907	1.1415
P78921	cct8	sp|P78921|TCPQ_SCHPO Probable T-complex protein 1 subunit theta OS=Schizosaccharomyces pombe (strain 972 / ATCC 24843) OX=284812 GN=cct8 PE=2 SV=3	23.6152	24.5107	23.9831	24.7307	24.9546	25.4767	10	24	59.955	27	1.37732	1.01767
P87153	cct7	sp|P87153|TCPH_SCHPO Probable T-complex protein 1 subunit eta OS=Schizosaccharomyces pombe (strain 972 / ATCC 24843) OX=284812 GN=cct7 PE=1 SV=1	22.0517	21.2386	21.1306	23.1604	23.1212	23.1746	7	18.3	60.686	16	1.54672	1.67844
Q00472	pho2	sp|Q00472|PNPP_SCHPO 4-nitrophenylphosphatase OS=Schizosaccharomyces pombe (strain 972 / ATCC 24843) OX=284812 GN=pho2 PE=4 SV=2	20.4492	21.1312	22.5366	24.8339	24.6704	24.3807	5	21.1	32.793	20	1.5345	3.25598
Q09841	pup1	sp|Q09841|PSB2_SCHPO Probable proteasome subunit beta type-2 OS=Schizosaccharomyces pombe (strain 972 / ATCC 24843) OX=284812 GN=pup1 PE=2 SV=1	21.8333	22.4826	21.4582	23.0984	24.3081	23.6858	4	19.5	29.337	9	1.72032	1.77279
Q9HGP5	acp2	sp|Q9HGP5|CAPZB_SCHPO F-actin-capping protein subunit beta OS=Schizosaccharomyces pombe (strain 972 / ATCC 24843) OX=284812 GN=acp2 PE=1 SV=1	20.9851	21.833	20.4674	23.0189	23.2064	23.2954	5	23.9	29.845	7	1.51558	2.07836
Q9P774	prp16	sp|Q9P774|PRP16_SCHPO Pre-mRNA-splicing factor ATP-dependent RNA helicase prp16 OS=Schizosaccharomyces pombe (strain 972 / ATCC 24843) OX=284812 GN=prp16 PE=3 SV=2	20.9332	22.8326	20.8803	24.6149	24.9206	24.5386	8	9.5	132.97	23	1.44766	3.14265
Q9UU77	SPCP1E11.10	sp|Q9UU77|YQMA_SCHPO Ankyrin repeat-containing protein P1E11.10 OS=Schizosaccharomyces pombe (strain 972 / ATCC 24843) OX=284812 GN=SPCP1E11.10 PE=4 SV=1	22.2303	21.0841	20.8694	23.358	23.1332	23.1949	2	16.4	22.863	10	1.33644	1.83409
Q9UUB5	mis13	sp|Q9UUB5|MIS13_SCHPO Kinetochore protein mis13 OS=Schizosaccharomyces pombe (strain 972 / ATCC 24843) OX=284812 GN=mis13 PE=1 SV=1	22.1236	20.9417	21.3018	22.783	23.1009	23.1707	3	11.6	36.797	7	1.44956	1.5625
Q9UUG1	SPAC926.08c	sp|Q9UUG1|RPF2_SCHPO Ribosome production factor 2 homolog OS=Schizosaccharomyces pombe (strain 972 / ATCC 24843) OX=284812 GN=SPAC926.08c PE=1 SV=1	21.4975	22.3986	22.5782	23.1145	23.4013	23.63	4	14.5	36.071	12	1.30177	1.22387
Q9UUM2	swi1	sp|Q9UUM2|SWI1_SCHPO Mating-type switching protein swi1 OS=Schizosaccharomyces pombe (strain 972 / ATCC 24843) OX=284812 GN=swi1 PE=1 SV=1	21.7513	19.9413	21.2706	23.7677	24.0292	23.7836	4	5.6	112.63	9	1.50649	2.87243

## Sheet: MMS
Protein IDs	Majority protein IDs	Protein names	Gene names	Fasta headers	LFQ intensity WT	LFQ intensity WT	LFQ intensity WT	LFQ intensity rtf2-TurboID	LFQ intensity rtf2-TurboID	LFQ intensity rtf2-TurboID	Unique peptides	Sequence coverage [%]	Mol. weight [kDa]	MS/MS count	-Log Welch's T-test p-value Rtf2_WT	Welch's T-test Difference Rtf2_WT	Welch's T-test Test statistic Rtf2_WT
O13749	O13749	Transcription initiation factor IIB	sua7	sp|O13749|TF2B_SCHPO Transcription initiation factor IIB OS=Schizosaccharomyces pombe (strain 972 / ATCC 24843) OX=284812 GN=sua7 PE=3 SV=1	21.3125	20.2919	21.5744	23.498	23.7257	23.6636	3	11.2	36.687	5	1.70173	2.5695	6.47085
O13768	O13768	Probable DNA repair helicase ercc3	ercc3	sp|O13768|ERCC3_SCHPO General transcription and DNA repair factor IIH helicase subunit XPB OS=Schizosaccharomyces pombe (strain 972 / ATCC 24843) OX=284812 GN=ptr8 PE=1 SV=1	21.6424	20.7444	20.5071	29.0575	29.0192	28.946	28	44.8	91.344	131	2.76937	8.0429	23.1613
O13802	O13802	Probable rRNA-processing protein ebp2	ebp2	sp|O13802|EBP2_SCHPO Probable rRNA-processing protein ebp2 OS=Schizosaccharomyces pombe (strain 972 / ATCC 24843) OX=284812 GN=ebp2 PE=1 SV=1	20.7339	22.5637	20.6828	26.1541	26.4337	25.6468	3	13.8	37.818	10	2.02815	4.7514	7.19813
O13831	O13831	Tryptophan synthase	trp2	sp|O13831|TRP_SCHPO Tryptophan synthase OS=Schizosaccharomyces pombe (strain 972 / ATCC 24843) OX=284812 GN=trp2 PE=2 SV=1	25.732	25.7942	26.2641	27.4346	27.4625	27.181	15	38.6	75.436	108	2.33597	1.42926	7.50858
O13845	O13845	RNA-binding protein rsd1	rsd1	sp|O13845|RSD1_SCHPO RNA-binding protein rsd1 OS=Schizosaccharomyces pombe (strain 972 / ATCC 24843) OX=284812 GN=rsd1 PE=1 SV=2	21.6476	20.9367	22.2047	24.088	23.7898	23.5186	5	11.9	69.362	12	1.83377	2.20247	5.47737
O13900	O13900	Pre-mRNA-splicing factor sap114	sap114	sp|O13900|SA114_SCHPO Pre-mRNA-splicing factor sap114 OS=Schizosaccharomyces pombe (strain 972 / ATCC 24843) OX=284812 GN=sap114 PE=1 SV=1	22.0728	21.5457	21.5816	24.1681	24.1489	24.1427	4	9.8	54.409	10	2.31604	2.41985	14.2189
O13936	O13936	Transcription elongation factor spt5	spt5	sp|O13936|SPT5_SCHPO Transcription elongation factor spt5 OS=Schizosaccharomyces pombe (strain 972 / ATCC 24843) OX=284812 GN=spt5 PE=1 SV=1	21.4684	21.3531	19.8413	28.184	28.4493	28.0157	18	27.6	109.01	73	2.46378	7.32873	13.5926
O13971	O13971	Suppressor of glycerol defect protein 1	sgd1	sp|O13971|SGD1_SCHPO Suppressor of glycerol defect protein 1 OS=Schizosaccharomyces pombe (strain 972 / ATCC 24843) OX=284812 GN=sgd1 PE=3 SV=1	20.8201	21.5577	21.2171	24.9683	24.76	24.5699	7	11.6	87.87	23	3.226	3.56781	14.7308
O14011	O14011	Pre-mRNA-processing factor 19	prp19	sp|O14011|PRP19_SCHPO Pre-mRNA-processing factor 19 OS=Schizosaccharomyces pombe (strain 972 / ATCC 24843) OX=284812 GN=prp19 PE=1 SV=1	22.2224	21.191	23.4941	25.7184	25.3893	25.5872	4	17	54.191	20	1.43295	3.26242	4.8484
O14053	O14053	U3 small nucleolar RNA-associated protein 21 homolog	SPCC1672.07	sp|O14053|UTP21_SCHPO U3 small nucleolar RNA-associated protein 21 homolog OS=Schizosaccharomyces pombe (strain 972 / ATCC 24843) OX=284812 GN=SPCC1672.07 PE=3 SV=1	21.1113	22.2389	20.4595	26.724	26.0832	26.2164	7	11	100.57	16	2.28942	5.07133	9.13418
O14174	O14174	SAGA complex subunit spt20	spt20	sp|O14174|SPT20_SCHPO SAGA complex subunit spt20 OS=Schizosaccharomyces pombe (strain 972 / ATCC 24843) OX=284812 GN=spt20 PE=1 SV=1	22.3114	21.1495	21.3427	24.8242	26.1283	25.5279	7	14.8	54.028	22	2.76232	3.89225	7.47379
O14233	O14233	mRNA 3-end-processing protein rna14	rna14	sp|O14233|RNA14_SCHPO mRNA 3-end-processing protein rna14 OS=Schizosaccharomyces pombe (strain 972 / ATCC 24843) OX=284812 GN=rna14 PE=3 SV=1	22.6905	21.3139	21.4722	24.5576	24.5353	24.6824	5	8.9	83.925	6	1.6417	2.76622	6.32592
O14236	O14236	Nucleolar GTP-binding protein 2	nog2	sp|O14236|NOG2_SCHPO Nucleolar GTP-binding protein 2 OS=Schizosaccharomyces pombe (strain 972 / ATCC 24843) OX=284812 GN=nog2 PE=1 SV=1	21.4677	21.6809	21.296	25.0557	25.3744	25.0731	8	18.4	59.913	27	4.74613	3.68621	24.2519
O14293	O14293	Putative aldehyde dehydrogenase-like protein C9E9.09c	SPAC9E9.09c	sp|O14293|YF19_SCHPO Putative aldehyde dehydrogenase-like protein C9E9.09c OS=Schizosaccharomyces pombe (strain 972 / ATCC 24843) OX=284812 GN=SPAC9E9.09c PE=1 SV=1	26.6349	26.6716	26.8434	27.8634	28.0065	27.7281	17	53.3	54.768	174	3.32678	1.14939	11.1696
O14325	O14325	Uncharacterized AAA domain-containing protein C16E9.10c	SPBC16E9.10c	sp|O14325|YB7A_SCHPO Uncharacterized AAA domain-containing protein C16E9.10c OS=Schizosaccharomyces pombe (strain 972 / ATCC 24843) OX=284812 GN=SPBC16E9.10c PE=1 SV=1	21.4131	21.7835	19.9899	23.8825	24.0318	23.6812	6	11.8	86.178	20	1.48998	2.80301	5.04083
O14339	O14339	60S ribosomal protein L17-A	rpl1701	sp|O14339|RL17A_SCHPO 60S ribosomal protein L17-A OS=Schizosaccharomyces pombe (strain 972 / ATCC 24843) OX=284812 GN=rpl1701 PE=3 SV=1	23.4604	23.6427	23.8768	24.2791	24.2783	24.3895	2	27.8	20.814	18	1.61766	0.655657	5.20165
O14370	O14370	Branched-chain-amino-acid aminotransferase, mitochondrial	eca39	sp|O14370|BCA1_SCHPO Branched-chain-amino-acid aminotransferase, mitochondrial OS=Schizosaccharomyces pombe (strain 972 / ATCC 24843) OX=284812 GN=eca39 PE=1 SV=3	24.0967	24.2864	24.5154	25.5735	25.7607	25.5544	7	23.9	47.855	46	2.67933	1.33004	9.65301
O14460	O14460	Elongation factor 2	eft201	sp|O14460|EF2_SCHPO Elongation factor 2 OS=Schizosaccharomyces pombe (strain 972 / ATCC 24843) OX=284812 GN=eft201 PE=1 SV=2	28.1422	28.1113	28.3484	27.9307	27.8577	28.0143	28	41.7	93.23	309	1.31342	-0.266421	-3.05832
O42643	O42643	Pre-mRNA-splicing factor ATP-dependent RNA helicase prp22	prp22	sp|O42643|PRP22_SCHPO Pre-mRNA-splicing factor ATP-dependent RNA helicase prp22 OS=Schizosaccharomyces pombe (strain 972 / ATCC 24843) OX=284812 GN=prp22 PE=1 SV=1	20.9859	21.637	22.4979	29.5017	29.4343	29.2009	23	29.2	131.49	135	2.63376	7.67201	17.1534
O42897	O42897	Probable 26S proteasome regulatory subunit rpn3	rpn3	sp|O42897|RPN3_SCHPO Probable 26S proteasome regulatory subunit rpn3 OS=Schizosaccharomyces pombe (strain 972 / ATCC 24843) OX=284812 GN=rpn3 PE=3 SV=2	21.3126	21.4809	21.6458	24.9336	25.7069	24.8187	9	22.3	57.346	19	2.56347	3.67328	12.4518
O42914	O42914	Uncharacterized protein C16A3.08c	SPBC16A3.08c	sp|O42914|YBI8_SCHPO Uncharacterized protein C16A3.08c OS=Schizosaccharomyces pombe (strain 972 / ATCC 24843) OX=284812 GN=SPBC16A3.08c PE=1 SV=1	21.7393	20.7637	21.4998	24.7632	24.3268	24.5178	4	20.4	30.949	18	2.49569	3.2017	10.0187
O42963	O42963	Nucleoporin nup44	nup44	sp|O42963|NUP44_SCHPO Nucleoporin nup44 OS=Schizosaccharomyces pombe (strain 972 / ATCC 24843) OX=284812 GN=nup44 PE=2 SV=1	21.5852	22.8262	22.0716	25.3884	25.5219	25.2125	8	31.3	44.483	25	2.0401	3.21327	8.63852
O43030	O43030	Hsp70 nucleotide exchange factor fes1	fes1	sp|O43030|FES1_SCHPO Hsp70 nucleotide exchange factor fes1 OS=Schizosaccharomyces pombe (strain 972 / ATCC 24843) OX=284812 GN=fes1 PE=1 SV=1	21.7839	22.5223	22.3388	24.0781	23.7972	24.3986	6	27.9	32.744	9	2.49198	1.87627	6.65639
O43051	O43051	Probable nucleolar complex protein 14	nop14	sp|O43051|NOP14_SCHPO Probable nucleolar complex protein 14 OS=Schizosaccharomyces pombe (strain 972 / ATCC 24843) OX=284812 GN=nop14 PE=1 SV=1	22.1257	21.6554	21.0962	27.4208	27.7394	27.8167	15	21.8	95.151	85	3.16323	6.03316	18.7778
O59702	O59702	Histone deacetylase clr6	clr6	sp|O59702|CLR6_SCHPO Histone deacetylase clr6 OS=Schizosaccharomyces pombe (strain 972 / ATCC 24843) OX=284812 GN=clr6 PE=1 SV=1	21.8908	21.4449	22.1135	27.3004	27.7428	27.7339	10	31.6	46.111	41	4.4357	5.77595	23.589
O59730	O59730	Methionine aminopeptidase 1	fma1	sp|O59730|MAP1_SCHPO Methionine aminopeptidase 1 OS=Schizosaccharomyces pombe (strain 972 / ATCC 24843) OX=284812 GN=fma1 PE=1 SV=1	21.6085	20.8296	21.5133	25.6211	25.1766	25.3185	5	23.7	42.139	19	3.19847	4.05492	14.5796
O59787	O59787	Signal recognition particle subunit srp72	srp72	sp|O59787|SRP72_SCHPO Signal recognition particle subunit srp72 OS=Schizosaccharomyces pombe (strain 972 / ATCC 24843) OX=284812 GN=srp72 PE=3 SV=1	21.9103	21.5659	22.3892	26.2198	26.6686	25.7797	12	28	63.28	32	3.57031	4.26755	12.1766
O59793	O59793	Stress response protein bis1	bis1	sp|O59793|ESS2_SCHPO Stress response protein bis1 OS=Schizosaccharomyces pombe (strain 972 / ATCC 24843) OX=284812 GN=bis1 PE=1 SV=1	22.7691	22.2948	22.8572	24.4392	24.5943	24.4096	5	21.6	43.023	21	2.30412	1.84071	10.0146
O59855;Q10265	O59855;Q10265	Probable heat shock protein ssa2;Probable heat shock protein ssa1	ssa2	sp|O59855|HSP72_SCHPO Probable heat shock protein ssa2 OS=Schizosaccharomyces pombe (strain 972 / ATCC 24843) OX=284812 GN=ssa2 PE=1 SV=3;sp|Q10265|HSP71_SCHPO Probable heat shock protein ssa1 OS=Schizosaccharomyces pombe (strain 972 / ATCC 24843) OX=28481	28.1699	28.5169	28.4564	29.3442	29.1439	29.0442	24	50.5	70.232	293	2.29425	0.796355	5.74279
O60070	O60070	Set1 complex component ash2	ash2	sp|O60070|ASH2_SCHPO Set1 complex component ash2 OS=Schizosaccharomyces pombe (strain 972 / ATCC 24843) OX=284812 GN=ash2 PE=4 SV=1	21.3399	21.1378	21.1187	26.7562	26.7682	26.84	12	25.5	74.252	50	4.57297	5.58934	74.0972
O60128	O60128	40S ribosomal protein S3	rps3	sp|O60128|RS3_SCHPO 40S ribosomal protein S3 OS=Schizosaccharomyces pombe (strain 972 / ATCC 24843) OX=284812 GN=rps3 PE=1 SV=1	27.5109	27.2385	27.5713	27.0041	27.0309	26.9631	8	39.8	27.553	95	1.34186	-0.440853	-4.22853
O60143	O60143	60S ribosomal protein L7-C	rpl703	sp|O60143|RL7C_SCHPO 60S ribosomal protein L7-C OS=Schizosaccharomyces pombe (strain 972 / ATCC 24843) OX=284812 GN=rpl701 PE=1 SV=1	21.712	21.6275	22.4433	25.1218	24.8144	24.5017	4	22.3	28.73	23	2.8714	2.88504	9.16317
O60145;O74456	O60145	Serine/threonine-protein kinase ppk23	ppk23	sp|O60145|PPK23_SCHPO Serine/threonine-protein kinase ppk23 OS=Schizosaccharomyces pombe (strain 972 / ATCC 24843) OX=284812 GN=ppk23 PE=3 SV=1	21.8492	25.5725	21.0761	27.896	29.2348	29.2012	18	52	46.123	125	1.39639	5.94476	4.0821
O74191	O74191	FK506-binding protein 39 kDa	fkbp39	sp|O74191|FKBP4_SCHPO FK506-binding protein 39 kDa OS=Schizosaccharomyces pombe (strain 972 / ATCC 24843) OX=284812 GN=fkbp39 PE=1 SV=1	21.7136	22.044	22.8196	26.0395	25.8118	25.964	4	16.6	39.301	37	2.22998	3.74599	11.1969
O74341	O74341	T-complex protein 1 subunit gamma	cct3	sp|O74341|TCPG_SCHPO T-complex protein 1 subunit gamma OS=Schizosaccharomyces pombe (strain 972 / ATCC 24843) OX=284812 GN=cct3 PE=1 SV=1	22.4271	20.6336	21.2441	25.9903	25.7776	25.7761	9	18.8	58.48	24	1.89502	4.41304	8.30684
O74484	O74484	Mannose-1-phosphate guanyltransferase	mpg1	sp|O74484|MPG1_SCHPO Mannose-1-phosphate guanyltransferase OS=Schizosaccharomyces pombe (strain 972 / ATCC 24843) OX=284812 GN=mpg1 PE=2 SV=1	24.1008	24.1089	23.9048	24.4331	24.4865	24.7024	4	16.8	39.718	31	2.00004	0.502494	4.74194
O74485	O74485	CUE domain-containing protein 3	SPCC1906.02c	sp|O74485|CUE3_SCHPO CUE domain-containing protein 3 OS=Schizosaccharomyces pombe (strain 972 / ATCC 24843) OX=284812 GN=SPCC1906.02c PE=1 SV=1	21.949	20.8745	22.7517	29.1715	29.0295	28.9107	10	19.8	65.857	81	2.30068	7.17884	13.077
O74489	O74489	Probable quinone oxidoreductase	zta1	sp|O74489|QOR_SCHPO Probable quinone oxidoreductase OS=Schizosaccharomyces pombe (strain 972 / ATCC 24843) OX=284812 GN=zta1 PE=1 SV=2	20.6381	20.5059	20.5494	23.4695	22.9226	23.1011	2	10.3	34.947	10	2.6035	2.59997	15.6967
O74500	O74500	Nucleoporin nup60	nup60	sp|O74500|NUP60_SCHPO Nucleoporin nup60 OS=Schizosaccharomyces pombe (strain 972 / ATCC 24843) OX=284812 GN=nup60 PE=1 SV=1	22.4491	20.017	20.9548	24.9823	25.7432	25.4722	6	12.4	80.252	13	1.72151	4.25893	5.737
O74511	O74511	Extragenic suppressor of kinetochore protein 1	ekc1	sp|O74511|EKC1_SCHPO Extragenic suppressor of kinetochore protein 1 OS=Schizosaccharomyces pombe (strain 972 / ATCC 24843) OX=284812 GN=ekc1 PE=1 SV=2	20.7532	21.4679	22.453	27.5932	28.0505	27.7047	12	21.1	94.966	62	2.41857	6.22473	12.1668
O74740	O74740	Cleavage factor two protein 2	cft2	sp|O74740|CFT2_SCHPO Cleavage factor two protein 2 OS=Schizosaccharomyces pombe (strain 972 / ATCC 24843) OX=284812 GN=cft2 PE=1 SV=1	21.1164	21.759	21.4869	24.7734	24.443	24.5904	9	14.2	89.45	17	3.1835	3.14816	15.0392
O74743	O74743	Eukaryotic translation initiation factor 4E-2	tif452	sp|O74743|IF4E2_SCHPO Eukaryotic translation initiation factor 4E-2 OS=Schizosaccharomyces pombe (strain 972 / ATCC 24843) OX=284812 GN=tif452 PE=3 SV=1	22.1395	22.0121	21.9183	24.818	24.5927	24.7267	4	18.5	27.653	5	5.09437	2.68915	29.3558
O74790	O74790	Monothiol glutaredoxin-4	grx4	sp|O74790|GLRX4_SCHPO Monothiol glutaredoxin-4 OS=Schizosaccharomyces pombe (strain 972 / ATCC 24843) OX=284812 GN=grx4 PE=1 SV=1	22.1863	21.1136	21.1593	23.982	23.234	22.813	2	16.8	27.099	12	1.71613	1.85659	3.79388
O74828	O74828	Pre-rRNA-processing protein esf1	esf1	sp|O74828|ESF1_SCHPO Pre-rRNA-processing protein esf1 OS=Schizosaccharomyces pombe (strain 972 / ATCC 24843) OX=284812 GN=esf1 PE=1 SV=1	20.83	22.7515	22.5758	26.1149	26.4225	25.8839	6	12.9	77.753	24	1.77147	4.08798	6.45975
O74887	O74887	Peroxiredoxin tpx1	tpx1	sp|O74887|TPX1_SCHPO Peroxiredoxin tpx1 OS=Schizosaccharomyces pombe (strain 972 / ATCC 24843) OX=284812 GN=tpx1 PE=1 SV=1	25.8907	26.2453	26.2112	27.3659	27.2168	27.0785	7	46.4	21.191	46	2.7031	1.10467	7.88275
O74897	O74897	SWR1-complex protein 5	swc5	sp|O74897|SWC5_SCHPO SWR1-complex protein 5 OS=Schizosaccharomyces pombe (strain 972 / ATCC 24843) OX=284812 GN=swc5 PE=3 SV=1	21.3923	23.2601	22.048	25.162	23.9963	23.9344	2	17.2	24.557	10	1.40703	2.13071	3.14579
O74958	O74958	YTH domain-containing protein mmi1	mmi1	sp|O74958|MMI1_SCHPO RNA binding exosome specificity factor Mmi1 OS=Schizosaccharomyces pombe (strain 972 / ATCC 24843) OX=284812 GN=mmi1 PE=1 SV=3	22.258	21.8503	20.9656	26.3364	26.5422	26.2023	5	19.1	54.538	27	2.35979	4.66901	11.8487
O74960	O74960	Probable sphingolipid long chain base-responsive protein pil1	pil1	sp|O74960|PIL1_SCHPO Probable sphingolipid long chain base-responsive protein pil1 OS=Schizosaccharomyces pombe (strain 972 / ATCC 24843) OX=284812 GN=pil1 PE=1 SV=1	20.8523	21.5957	21.331	22.79	22.7072	22.598	2	6.3	39.805	6	1.76505	1.43874	6.40724
O74970	O74970	Pre-mRNA-processing factor 39	prp39	sp|O74970|PRP39_SCHPO Pre-mRNA-processing factor 39 OS=Schizosaccharomyces pombe (strain 972 / ATCC 24843) OX=284812 GN=prp39 PE=3 SV=1	20.4031	21.8753	20.5514	25.9048	25.5687	25.5253	12	24.7	71.246	26	2.16931	4.72299	9.77611
O94255	O94255	Carbonic anhydrase	SPBP8B7.05c	sp|O94255|CAN_SCHPO Carbonic anhydrase OS=Schizosaccharomyces pombe (strain 972 / ATCC 24843) OX=284812 GN=SPBP8B7.05c PE=1 SV=2	22.2316	21.7945	20.5966	27.222	27.1201	27.2578	7	28.7	37.009	24	2.15146	5.65907	11.5387
O94264	O94264	Uncharacterized RING finger protein P8B7.15c	SPBP8B7.15c	sp|O94264|YORF_SCHPO Uncharacterized RING finger protein P8B7.15c OS=Schizosaccharomyces pombe (strain 972 / ATCC 24843) OX=284812 GN=SPBP8B7.15c PE=4 SV=1	21.5239	20.9393	21.1047	24.8563	24.7586	23.7866	3	11.2	53.163	9	2.45891	3.27787	8.55334
O94288	O94288	Nucleolar complex-associated protein 3	noc3	sp|O94288|NOC3_SCHPO Nucleolar complex-associated protein 3 OS=Schizosaccharomyces pombe (strain 972 / ATCC 24843) OX=284812 GN=noc3 PE=1 SV=1	20.58	20.836	20.5249	26.0018	26.1783	26.2868	11	20.2	85.099	34	5.68182	5.50862	43.4362
O94308	O94308	COP9 signalosome complex subunit 1	csn1	sp|O94308|CSN1_SCHPO COP9 signalosome complex subunit 1 OS=Schizosaccharomyces pombe (strain 972 / ATCC 24843) OX=284812 GN=csn1 PE=1 SV=1	21.816	21.3953	20.1846	24.6387	24.8529	24.6737	5	14	48.657	13	1.77882	3.58977	7.27431
O94326	O94326	Zinc finger protein C725.08	SPBC725.08	sp|O94326|PIR2_SCHPO NURS complex subunit pir2 OS=Schizosaccharomyces pombe (strain 972 / ATCC 24843) OX=284812 GN=pir2 PE=1 SV=1	20.3314	21.459	22.4451	24.1844	24.1801	24.2833	5	11.5	70.864	12	1.35739	2.80411	4.58513
O94374	O94374	Importin subunit alpha-2	imp1	sp|O94374|IMA2_SCHPO Importin subunit alpha-2 OS=Schizosaccharomyces pombe (strain 972 / ATCC 24843) OX=284812 GN=imp1 PE=1 SV=1	21.8833	21.3638	22.5272	24.8205	24.8236	24.4668	5	16.1	59.852	12	2.08125	2.77885	7.79057
O94416	O94416	Transcription initiation factor IIF subunit alpha	tfg1	sp|O94416|T2FA_SCHPO Transcription initiation factor IIF subunit alpha OS=Schizosaccharomyces pombe (strain 972 / ATCC 24843) OX=284812 GN=tfg1 PE=1 SV=2	22.5906	22.6	22.2724	26.4866	26.6733	26.3775	9	24.3	61.611	23	4.90388	4.02483	29.1598
O94514	O94514	Nucleolar protein 56	nop56	sp|O94514|NOP56_SCHPO Nucleolar protein 56 OS=Schizosaccharomyces pombe (strain 972 / ATCC 24843) OX=284812 GN=nop56 PE=3 SV=1	21.4794	21.431	22.0344	25.9474	25.2383	25.4873	10	31	55.388	39	3.77912	3.90937	13.7682
O94529	O94529	FACT complex subunit pob3	pob3	sp|O94529|POB3_SCHPO FACT complex subunit pob3 OS=Schizosaccharomyces pombe (strain 972 / ATCC 24843) OX=284812 GN=pob3 PE=3 SV=1	21.8411	21.9282	21.7659	25.2608	24.4013	24.7693	6	18.9	57.456	22	2.25208	2.9654	11.7057
O94538	O94538	U4/U6.U5 tri-snRNP-associated protein snu66	snu66	sp|O94538|SNU66_SCHPO U4/U6.U5 tri-snRNP-associated protein snu66 OS=Schizosaccharomyces pombe (strain 972 / ATCC 24843) OX=284812 GN=snu66 PE=1 SV=1	21.2828	21.7135	21.3565	26.1058	26.3391	25.8847	5	13.6	74.733	20	4.81361	4.65893	24.9433
O94564	O94564	Zinc-type alcohol dehydrogenase-like protein C1773.06c	SPBC1773.06c	sp|O94564|YGD6_SCHPO Zinc-type alcohol dehydrogenase-like protein C1773.06c OS=Schizosaccharomyces pombe (strain 972 / ATCC 24843) OX=284812 GN=SPBC1773.06c PE=3 SV=1	21.5037	22.1436	21.5242	25.1171	25.7092	25.7193	4	22	37.32	15	3.70066	3.79136	13.1033
O94582	O94582	Probable anthranilate synthase component 1	trp3	sp|O94582|TRPE_SCHPO Probable anthranilate synthase component 1 OS=Schizosaccharomyces pombe (strain 972 / ATCC 24843) OX=284812 GN=trp3 PE=1 SV=1	21.1517	20.1738	20.9415	21.8967	22.1557	22.4836	3	9.2	54.959	11	1.64651	1.42301	4.15763
O94620	O94620	Pre-mRNA-splicing factor cwf17	cwf17	sp|O94620|CWF17_SCHPO Pre-mRNA-splicing factor cwf17 OS=Schizosaccharomyces pombe (strain 972 / ATCC 24843) OX=284812 GN=cwf17 PE=1 SV=1	21.7855	22.7587	22.2727	26.0224	25.5668	25.4927	7	36.2	37.427	31	2.88352	3.42162	10.4923
O94640	O94640	NAD-dependent histone deacetylase sir2	sir2	sp|O94640|SIR2_SCHPO NAD-dependent histone deacetylase sir2 OS=Schizosaccharomyces pombe (strain 972 / ATCC 24843) OX=284812 GN=sir2 PE=1 SV=2	21.3939	21.6727	22.9125	28.756	28.452	28.2814	16	53.9	53.442	74	2.54385	6.50339	13.3564
O94642	O94642	tRNA-specific adenosine deaminase subunit tad2	tad2	sp|O94642|TAD2_SCHPO tRNA-specific adenosine deaminase subunit tad2 OS=Schizosaccharomyces pombe (strain 972 / ATCC 24843) OX=284812 GN=tad2 PE=3 SV=2	20.7282	21.7212	21.0711	23.9638	24.0474	23.9001	3	9.3	43.603	13	2.02265	2.7969	9.5044
O94659	O94659	Probable nucleolar GTP-binding protein 1	nog1	sp|O94659|NOG1_SCHPO Probable nucleolar GTP-binding protein 1 OS=Schizosaccharomyces pombe (strain 972 / ATCC 24843) OX=284812 GN=nog1 PE=1 SV=2	21.2939	22.2667	21.6407	26.3424	26.6409	25.8699	8	17.8	72.798	20	3.50192	4.55064	12.5538
O94740	O94740	Hsp90 co-chaperone Cdc37	cdc37	sp|O94740|CDC37_SCHPO Hsp90 co-chaperone Cdc37 OS=Schizosaccharomyces pombe (strain 972 / ATCC 24843) OX=284812 GN=cdc37 PE=1 SV=1	21.553	21.2236	19.857	23.7995	23.4893	23.487	2	7.3	52.553	8	1.51393	2.71407	5.12569
P07669	P07669	Triosephosphate isomerase	tpi1	sp|P07669|TPIS_SCHPO Triosephosphate isomerase OS=Schizosaccharomyces pombe (strain 972 / ATCC 24843) OX=284812 GN=tpi1 PE=1 SV=4	26.273	26.4434	26.4208	25.8949	25.8091	25.881	7	45.4	27.227	71	2.45458	-0.517408	-8.67143
P0CH07;P0CH06;P0C8R3;P0C016;P0CG72	P0CH07;P0CH06;P0C8R3;P0C016;P0CG72	Ubiquitin-60S ribosomal protein L40;Ubiquitin;60S ribosomal protein L40;Ubiquitin-40S ribosomal protein S27b;Ubiquitin;40S ribosomal protein S27b;Ubiquitin-40S ribosomal protein S27a;Ubiquitin;40S ribosomal protein S27a;Polyubiquitin;Ubiquitin	ubi2	sp|P0CH07|RL402_SCHPO Ubiquitin-60S ribosomal protein L40 OS=Schizosaccharomyces pombe (strain 972 / ATCC 24843) OX=284812 GN=uep1 PE=1 SV=1;sp|P0CH06|RL401_SCHPO Ubiquitin-60S ribosomal protein L40 OS=Schizosaccharomyces pombe (strain 972 / ATCC 24843) OX	27.91	27.6015	27.4338	28.1678	28.3869	28.274	3	27.3	14.595	50	1.52072	0.627781	4.09921
P0CT61;P0CT60	P0CT61;P0CT60		rpl2302	sp|P0CT61|RL23B_SCHPO 60S ribosomal protein L23-B OS=Schizosaccharomyces pombe (strain 972 / ATCC 24843) OX=284812 GN=rpl2302 PE=3 SV=1;sp|P0CT60|RL23A_SCHPO 60S ribosomal protein L23-A OS=Schizosaccharomyces pombe (strain 972 / ATCC 24843) OX=284812 GN=rp	26.9946	26.7749	26.9786	26.549	26.5102	26.5382	5	46	14.882	70	1.52869	-0.383605	-5.35358
P12000	P12000	DNA ligase 1	cdc17	sp|P12000|DNLI1_SCHPO DNA ligase 1 OS=Schizosaccharomyces pombe (strain 972 / ATCC 24843) OX=284812 GN=cdc17 PE=3 SV=1	22.8075	20.7747	21.7951	28.1493	27.7899	27.9078	17	38.3	86.58	77	2.12842	6.15657	10.3253
P14068	P14068	Exportin-1	crm1	sp|P14068|XPO1_SCHPO Exportin-1 OS=Schizosaccharomyces pombe (strain 972 / ATCC 24843) OX=284812 GN=xpo1 PE=1 SV=3	22.8692	21.4715	21.262	24.4411	24.6357	24.6628	6	4.6	123.57	14	1.5104	2.71231	5.32601
P18869	P18869	3-isopropylmalate dehydrogenase	leu1	sp|P18869|LEU3_SCHPO 3-isopropylmalate dehydrogenase OS=Schizosaccharomyces pombe (strain 972 / ATCC 24843) OX=284812 GN=leu1 PE=1 SV=1	21.5763	21.5354	22.1906	26.292	26.4755	26.0807	8	36.7	39.732	44	3.54167	4.51526	18.7618
P21696	P21696	Glycerol-3-phosphate dehydrogenase [NAD(+)] 1	gpd1	sp|P21696|GPD1_SCHPO Glycerol-3-phosphate dehydrogenase [NAD(+)] 1 OS=Schizosaccharomyces pombe (strain 972 / ATCC 24843) OX=284812 GN=gpd1 PE=1 SV=2	25.344	25.4757	25.4172	26.044	25.956	25.9271	8	33.2	41.995	64	3.3751	0.563356	10.8654
P36612	P36612	26S protease regulatory subunit 4 homolog	mts2	sp|P36612|PRS4_SCHPO 26S proteasome regulatory subunit 4 homolog OS=Schizosaccharomyces pombe (strain 972 / ATCC 24843) OX=284812 GN=mts2 PE=2 SV=1	21.5101	21.4373	21.7882	24.3951	25.0571	24.64	6	21.2	50.06	9	3.20409	3.1189	14.121
P39964	P39964	Pre-mRNA-splicing factor cdc5	cdc5	sp|P39964|CEF1_SCHPO Pre-mRNA-splicing factor cdc5 OS=Schizosaccharomyces pombe (strain 972 / ATCC 24843) OX=284812 GN=cdc5 PE=1 SV=1	21.4678	22.2552	22.3912	27.5012	27.8656	27.628	18	40.2	86.843	83	3.04022	5.62684	18.3282
P40847	P40847	Switch-activating protein 1	sap1	sp|P40847|SAP1_SCHPO Switch-activating protein 1 OS=Schizosaccharomyces pombe (strain 972 / ATCC 24843) OX=284812 GN=sap1 PE=1 SV=2	21.7083	21.9105	21.8477	25.9878	25.9717	26.1648	6	32.3	29.127	32	5.97986	4.21926	49.0566
P41887	P41887	Heat shock protein 90 homolog	swo1	sp|P41887|HSP90_SCHPO Heat shock protein 90 homolog OS=Schizosaccharomyces pombe (strain 972 / ATCC 24843) OX=284812 GN=swo1 PE=1 SV=2	28.0817	27.8716	28.1232	28.2877	28.3624	28.4913	26	45.3	80.595	248	1.60154	0.354939	3.62197
P55306	P55306	Catalase	cta1	sp|P55306|CATA_SCHPO Catalase OS=Schizosaccharomyces pombe (strain 972 / ATCC 24843) OX=284812 GN=cta1 PE=1 SV=1	23.8452	23.4322	24.146	25.8734	26.0196	26.1912	8	20.5	58.279	35	2.49789	2.22026	9.80905
P78773	P78773	Probable acetyl-coenzyme A synthetase		sp|P78773|ACSA_SCHPO Probable acetyl-coenzyme A synthetase OS=Schizosaccharomyces pombe (strain 972 / ATCC 24843) OX=284812 GN=SPCC191.02c PE=1 SV=2	20.6921	21.1287	21.8208	27.5718	27.5041	27.6613	17	35.6	73.035	68	2.64419	6.36519	19.1872
P78794	P78794	Pre-mRNA-splicing factor cwf15	cwf15	sp|P78794|CWC15_SCHPO Pre-mRNA-splicing factor cwf15 OS=Schizosaccharomyces pombe (strain 972 / ATCC 24843) OX=284812 GN=cwf15 PE=1 SV=2	21.8788	21.2016	23.3646	26.91	27.0526	26.712	4	24.2	30.432	14	1.7993	4.74322	7.3383
P78814	P78814	Pre-mRNA-splicing factor srp2	srp2	sp|P78814|SRP2_SCHPO Pre-mRNA-splicing factor srp2 OS=Schizosaccharomyces pombe (strain 972 / ATCC 24843) OX=284812 GN=srp2 PE=1 SV=2	23.0172	21.5552	21.6703	25.9061	25.8347	25.5196	7	25.5	42.566	31	1.92215	3.67255	7.5861
P78921	P78921	Probable T-complex protein 1 subunit theta	cct8	sp|P78921|TCPQ_SCHPO Probable T-complex protein 1 subunit theta OS=Schizosaccharomyces pombe (strain 972 / ATCC 24843) OX=284812 GN=cct8 PE=2 SV=3	22.2827	23.4454	22.9723	24.2948	24.7779	24.426	10	24	59.955	27	1.56025	1.59943	4.3568
P87058	P87058	La protein homolog	sla1	sp|P87058|LAH1_SCHPO La protein homolog OS=Schizosaccharomyces pombe (strain 972 / ATCC 24843) OX=284812 GN=sla1 PE=1 SV=1	22.1309	21.7524	20.586	26.0648	26.1017	26.3435	7	32.6	34.616	32	2.09743	4.68023	9.89332
P87115	P87115	UPF0202 protein C20G8.09c	SPAC20G8.09c	sp|P87115|NAT10_SCHPO RNA cytidine acetyltransferase OS=Schizosaccharomyces pombe (strain 972 / ATCC 24843) OX=284812 GN=nat10 PE=1 SV=1	22.0926	21.3236	21.625	25.9024	26.0899	25.7867	13	19.5	116.46	32	3.06002	4.24595	17.6514
P87126	P87126	Pre-mRNA-splicing factor cwf2	cwf2	sp|P87126|CWC2_SCHPO Pre-mRNA-splicing factor cwf2 OS=Schizosaccharomyces pombe (strain 972 / ATCC 24843) OX=284812 GN=cwf2 PE=1 SV=2	21.4608	20.9339	20.8175	26.4942	26.0914	26.3953	7	32	44.281	24	4.02367	5.25625	22.6489
P87137	P87137	Uncharacterized protein C57A7.06	SPAC57A7.06	sp|P87137|YDM6_SCHPO Uncharacterized protein C57A7.06 OS=Schizosaccharomyces pombe (strain 972 / ATCC 24843) OX=284812 GN=SPAC57A7.06 PE=1 SV=1	21.7651	22.6727	21.0895	27.825	27.9585	27.9235	7	9	105.06	29	2.26786	6.05989	13.1626
P87216	P87216	Protein vip1	vip1	sp|P87216|VIPI_SCHPO Protein vip1 OS=Schizosaccharomyces pombe (strain 972 / ATCC 24843) OX=284812 GN=vip1 PE=1 SV=1	23.7527	23.4502	23.157	26.1702	25.8056	26.1586	10	59.9	27.459	33	3.33154	2.59148	12.3697
P87312	P87312	Pre-mRNA-splicing factor cwf4	cwf4	sp|P87312|CLF1_SCHPO Pre-mRNA-splicing factor cwf4 OS=Schizosaccharomyces pombe (strain 972 / ATCC 24843) OX=284812 GN=cwf4 PE=1 SV=1	20.8408	20.2882	22.3359	31.3109	31.2122	31.4833	24	43.6	80.84	215	2.50021	10.1805	16.5066
Q00472	Q00472	4-nitrophenylphosphatase	pho2	sp|Q00472|PNPP_SCHPO 4-nitrophenylphosphatase OS=Schizosaccharomyces pombe (strain 972 / ATCC 24843) OX=284812 GN=pho2 PE=4 SV=2	22.2585	22.0609	21.6694	24.9764	25.3945	25.0862	5	21.1	32.793	20	3.65655	3.15611	14.7752
Q09179	Q09179	Glutamine synthetase	gln1	sp|Q09179|GLNA_SCHPO Glutamine synthetase OS=Schizosaccharomyces pombe (strain 972 / ATCC 24843) OX=284812 GN=gln1 PE=1 SV=2	21.4353	21.4344	21.8894	23.3452	23.863	23.5931	3	13.4	40.018	14	3.15695	2.01404	9.46125
Q09671	Q09671	Putative NADPH dehydrogenase C5H10.10	SPAC5H10.10	sp|Q09671|OYEB_SCHPO Putative NADPH dehydrogenase C5H10.10 OS=Schizosaccharomyces pombe (strain 972 / ATCC 24843) OX=284812 GN=SPAC5H10.10 PE=3 SV=1	22.2031	20.7172	21.5415	26.1199	26.2559	26.3273	9	30.9	44.983	19	2.14361	4.74711	10.9354
Q09676	Q09676	Probable phosphatase SPAC5H10.03	SPAC5H10.03	sp|Q09676|YA03_SCHPO Probable phosphatase SPAC5H10.03 OS=Schizosaccharomyces pombe (strain 972 / ATCC 24843) OX=284812 GN=SPAC5H10.03 PE=3 SV=1	21.3983	21.1036	22.03	25.5451	25.9893	25.5142	6	38.8	24.716	20	3.14588	4.17224	13.3125
Q09719	Q09719	ATP-dependent RNA helicase dbp10	dbp10	sp|Q09719|DBP10_SCHPO ATP-dependent RNA helicase dbp10 OS=Schizosaccharomyces pombe (strain 972 / ATCC 24843) OX=284812 GN=dbp10 PE=1 SV=1	20.7718	21.8225	20.8694	23.2888	23.385	23.1363	3	3.8	94.66	7	1.69267	2.11544	6.16923
Q09745	Q09745	Uncharacterized protein C12C2.04	SPBC12C2.04	sp|Q09745|YB64_SCHPO Uncharacterized protein C12C2.04 OS=Schizosaccharomyces pombe (strain 972 / ATCC 24843) OX=284812 GN=SPBC12C2.04 PE=4 SV=1	24.7386	24.5812	24.5256	25.6018	26.1456	26.1116	7	25.8	43.031	46	2.00713	1.33788	7.15116
Q09793	Q09793	Nucleoporin nup45	nup45	sp|Q09793|NUP45_SCHPO Nucleoporin nup45 OS=Schizosaccharomyces pombe (strain 972 / ATCC 24843) OX=284812 GN=nup45 PE=1 SV=2	21.2468	22.9874	21.9066	25.5099	25.0979	24.8973	4	12.5	44.983	13	1.77931	3.12142	5.7973
Q09799	Q09799	Protein kri1	kri1	sp|Q09799|KRI1_SCHPO Protein kri1 OS=Schizosaccharomyces pombe (strain 972 / ATCC 24843) OX=284812 GN=kri1 PE=1 SV=1	21.2822	21.8825	22.2657	28.8287	29.0095	28.9813	18	42.1	69.523	122	2.94575	7.12968	24.4454
Q09813	Q09813	Putative transcription initiation factor TFIID 111 kDa subunit	SPAC2G11.14	sp|Q09813|T111_SCHPO Putative transcription initiation factor TFIID 111 kDa subunit OS=Schizosaccharomyces pombe (strain 972 / ATCC 24843) OX=284812 GN=SPAC2G11.14 PE=1 SV=1	21.7993	20.8759	20.8616	26.2048	26.4871	25.8457	9	12.8	111.01	24	3.2866	5.00026	13.8327
Q09859	Q09859	Probable peptide methionine sulfoxide reductase	mxr1	sp|Q09859|MSRA_SCHPO Probable peptide methionine sulfoxide reductase OS=Schizosaccharomyces pombe (strain 972 / ATCC 24843) OX=284812 GN=mxr1 PE=3 SV=2	21.57	21.0616	21.1901	24.6637	25.0909	24.9506	4	35.9	19.437	12	4.17115	3.62785	18.3485
Q09882	Q09882	Pre-mRNA-processing protein 45	prp45	sp|Q09882|PRP45_SCHPO Pre-mRNA-processing protein 45 OS=Schizosaccharomyces pombe (strain 972 / ATCC 24843) OX=284812 GN=prp45 PE=1 SV=1	21.8712	22.1436	21.2771	28.0867	28.4043	28.6192	13	32.1	62.696	64	3.9649	6.60609	22.0974
Q09898	Q09898	Serine/threonine-protein kinase sid2	sid2	sp|Q09898|SID2_SCHPO Serine/threonine-protein kinase sid2 OS=Schizosaccharomyces pombe (strain 972 / ATCC 24843) OX=284812 GN=sid2 PE=1 SV=1	21.8712	21.5491	21.6262	23.866	24.2273	24.0362	5	11.2	70.491	10	4.09336	2.36098	16.5632
Q09904	Q09904	Nucleoporin nup124	nup124	sp|Q09904|NU124_SCHPO Nucleoporin nup124 OS=Schizosaccharomyces pombe (strain 972 / ATCC 24843) OX=284812 GN=nup124 PE=1 SV=1	21.0547	21.5809	20.7064	30.8695	30.7906	30.6375	27	35.5	123.97	184	3.49006	9.65188	36.6766
Q10101	Q10101	40S ribosomal protein S7	rps7	sp|Q10101|RS7_SCHPO 40S ribosomal protein S7 OS=Schizosaccharomyces pombe (strain 972 / ATCC 24843) OX=284812 GN=rps7 PE=1 SV=2	23.6322	24.1087	24.5936	26.8669	26.848	27.1396	7	51.8	21.947	65	2.28939	2.84	9.69037
Q10154	Q10154	Replication termination factor 2	rtf2	sp|Q10154|RTF2_SCHPO Replication termination factor 2 OS=Schizosaccharomyces pombe (strain 972 / ATCC 24843) OX=284812 GN=rtf2 PE=1 SV=1	21.6858	21.7643	20.9044	30.2107	30.0313	30.0813	13	54.6	27.057	130	3.16345	8.65629	30.9534
Q10168	Q10168	Nucleoporin nsp1	nsp1	sp|Q10168|NSP1_SCHPO Nucleoporin nsp1 OS=Schizosaccharomyces pombe (strain 972 / ATCC 24843) OX=284812 GN=nsp1 PE=1 SV=1	21.7454	20.8908	21.3963	27.9959	27.9858	27.6327	18	59	60.73	74	3.66515	6.52726	23.7088
Q10202	Q10202	ATP-dependent RNA helicase dbp3	dbp3	sp|Q10202|DBP3_SCHPO ATP-dependent RNA helicase dbp3 OS=Schizosaccharomyces pombe (strain 972 / ATCC 24843) OX=284812 GN=dbp3 PE=3 SV=1	20.6384	21.4852	20.5887	22.2875	22.6762	22.5635	4	10	63.912	12	1.70036	1.60499	5.12819
Q10284	Q10284	Heat shock protein sks2	sks2	sp|Q10284|SSB1_SCHPO Ribosome-associated molecular chaperone sks2 OS=Schizosaccharomyces pombe (strain 972 / ATCC 24843) OX=284812 GN=sks2 PE=1 SV=2	28.002	28.0225	27.9596	27.8327	27.7401	27.8331	19	54	67.205	209	1.98912	-0.1927	-5.34353
Q10752	Q10752	Pre-mRNA-splicing factor ATP-dependent RNA helicase-like protein cdc28	cdc28	sp|Q10752|CDC28_SCHPO Pre-mRNA-splicing factor ATP-dependent RNA helicase-like protein cdc28 OS=Schizosaccharomyces pombe (strain 972 / ATCC 24843) OX=284812 GN=cdc28 PE=3 SV=2	21.6738	22.0789	21.2857	28.1963	27.8127	27.8129	22	28.4	121.22	107	3.92659	6.26118	23.8758
Q8WZK0	Q8WZK0	U1 snRNP-associated protein usp107	usp107	sp|Q8WZK0|US107_SCHPO U1 snRNP-associated protein usp107 OS=Schizosaccharomyces pombe (strain 972 / ATCC 24843) OX=284812 GN=usp107 PE=1 SV=1	22.4146	21.4082	21.2698	24.9979	24.6944	25.0111	7	16.8	81.043	20	2.07912	3.20359	8.53643
Q9C0V7	Q9C0V7	Uncharacterized sulfatase PB10D8.02c	SPBPB10D8.02c	sp|Q9C0V7|YHJ2_SCHPO Uncharacterized sulfatase PB10D8.02c OS=Schizosaccharomyces pombe (strain 972 / ATCC 24843) OX=284812 GN=SPBPB10D8.02c PE=3 SV=1	21.143	21.1666	21.9609	24.8938	24.9176	24.1871	5	17.1	62.421	9	3.04865	3.24268	9.00509
Q9C0X6	Q9C0X6	RuvB-like helicase 1	rvb1	sp|Q9C0X6|RUVB1_SCHPO RuvB-like helicase 1 OS=Schizosaccharomyces pombe (strain 972 / ATCC 24843) OX=284812 GN=rvb1 PE=3 SV=1	21.5647	21.6511	21.4446	24.4555	24.2049	24.1534	3	11.4	50.052	5	4.22733	2.71782	24.5174
Q9C0Y6	Q9C0Y6	Zinc-type alcohol dehydrogenase-like protein PB24D3.08c	SPAPB24D3.08c	sp|Q9C0Y6|YKM8_SCHPO Zinc-type alcohol dehydrogenase-like protein PB24D3.08c OS=Schizosaccharomyces pombe (strain 972 / ATCC 24843) OX=284812 GN=SPAPB24D3.08c PE=3 SV=1	25.55	25.2135	25.3654	28.6511	28.6475	28.5975	9	43.6	38.612	74	3.19114	3.25579	32.9472
Q9HGL4	Q9HGL4	tRNA (adenine(58)-N(1))-methyltransferase non-catalytic subunit trm6	gcd10	sp|Q9HGL4|TRM6_SCHPO tRNA (adenine(58)-N(1))-methyltransferase non-catalytic subunit trm6 OS=Schizosaccharomyces pombe (strain 972 / ATCC 24843) OX=284812 GN=gcd10 PE=3 SV=1	22.2811	22.2735	21.5435	24.3978	24.0432	24.2425	7	24.2	53.2	15	2.25706	2.19513	8.27519
Q9HGL6	Q9HGL6	Ribosome biogenesis protein brx1	brx1	sp|Q9HGL6|BRX1_SCHPO Ribosome biogenesis protein brx1 OS=Schizosaccharomyces pombe (strain 972 / ATCC 24843) OX=284812 GN=brx1 PE=3 SV=1	22.1792	22.7677	21.2648	24.2991	24.4313	24.4225	5	16.3	33.899	15	1.48333	2.31377	5.26679
Q9P383	Q9P383	Nuclear cap-binding protein subunit 2	cbc2	sp|Q9P383|NCBP2_SCHPO Nuclear cap-binding protein subunit 2 OS=Schizosaccharomyces pombe (strain 972 / ATCC 24843) OX=284812 GN=cbc2 PE=3 SV=1	22.0382	22.9927	21.5864	26.0091	26.2091	26.2253	3	30.2	20.798	13	2.02911	3.94207	9.37903
Q9P4W9	Q9P4W9	40S ribosomal protein S4-C	rps403	sp|Q9P4W9|RS4C_SCHPO 40S ribosomal protein S4-C OS=Schizosaccharomyces pombe (strain 972 / ATCC 24843) OX=284812 GN=rps403 PE=1 SV=1	27.7786	27.8822	28.1809	27.2484	27.2749	27.44	1	39.3	29.674	114	1.70434	-0.626089	-4.64889
Q9P6P7	Q9P6P7	Uncharacterized RNA-binding protein C644.16	SPAC644.16	sp|Q9P6P7|YKCG_SCHPO Uncharacterized RNA-binding protein C644.16 OS=Schizosaccharomyces pombe (strain 972 / ATCC 24843) OX=284812 GN=SPAC644.16 PE=4 SV=1	22.9353	21.6562	20.5491	28.0556	27.9543	27.6057	11	44.3	45.01	59	1.99628	6.15835	8.76282
Q9P6R0	Q9P6R0	Transcription factor IIIB 60 kDa subunit	brf1	sp|Q9P6R0|TF3B_SCHPO Transcription factor IIIB 60 kDa subunit OS=Schizosaccharomyces pombe (strain 972 / ATCC 24843) OX=284812 GN=brf1 PE=1 SV=2	22.1991	22.2641	21.0421	24.3809	24.4178	23.9168	3	7.7	55.795	7	1.80712	2.4034	5.60988
Q9P6R2	Q9P6R2	Uncharacterized protein C13E7.08c	SPBC13E7.08c	sp|Q9P6R2|YOH8_SCHPO Uncharacterized protein C13E7.08c OS=Schizosaccharomyces pombe (strain 972 / ATCC 24843) OX=284812 GN=SPBC13E7.08c PE=3 SV=1	21.3583	21.9177	20.8204	26.8103	26.8804	26.9399	6	18.2	48.733	30	2.53033	5.51139	17.2769
Q9P6R9	Q9P6R9	Pre-mRNA-splicing factor cwf22	cwf22	sp|Q9P6R9|CWC22_SCHPO Pre-mRNA-splicing factor cwf22 OS=Schizosaccharomyces pombe (strain 972 / ATCC 24843) OX=284812 GN=cwf22 PE=1 SV=3	21.5156	22.3278	22.1773	27.1172	26.9258	26.9085	11	16.6	102.77	53	2.85298	4.97694	19.2698
Q9P772	Q9P772	GMP synthase [glutamine-hydrolyzing]	gua1	sp|Q9P772|GUAA_SCHPO GMP synthase [glutamine-hydrolyzing] OS=Schizosaccharomyces pombe (strain 972 / ATCC 24843) OX=284812 GN=gua1 PE=3 SV=1	21.0785	20.995	21.3277	24.5086	24.6125	24.1833	8	21.7	60.044	22	4.24864	3.30103	20.2031
Q9P774	Q9P774	Pre-mRNA-splicing factor ATP-dependent RNA helicase prp16	prp16	sp|Q9P774|PRP16_SCHPO Pre-mRNA-splicing factor ATP-dependent RNA helicase prp16 OS=Schizosaccharomyces pombe (strain 972 / ATCC 24843) OX=284812 GN=prp16 PE=3 SV=2	22.0017	20.4167	21.2663	24.4939	24.8201	25.0481	8	9.5	132.97	23	2.01688	3.55918	7.33293
Q9P784	Q9P784	60S ribosomal protein L4-B	rpl4b	sp|Q9P784|RL4B_SCHPO 60S ribosomal protein L4-B OS=Schizosaccharomyces pombe (strain 972 / ATCC 24843) OX=284812 GN=rpl401 PE=3 SV=1	23.4344	25.5404	25.5629	28.0355	27.8108	27.7558	4	39.4	39.91	83	1.3133	3.02147	4.24989
Q9P785	Q9P785	LisH domain-containing protein C1711.05	SPBC1711.05	sp|Q9P785|YNY5_SCHPO LisH domain-containing protein C1711.05 OS=Schizosaccharomyces pombe (strain 972 / ATCC 24843) OX=284812 GN=SPBC1711.05 PE=4 SV=1	21.6523	21.232	21.6284	24.9005	25.0749	24.8367	5	15.3	47.427	14	3.72147	3.43314	22.3296
Q9P7B4	Q9P7B4	Uncharacterized oxidoreductase C521.03	SPAC521.03	sp|Q9P7B4|YI13_SCHPO NADP-dependent 3-hydroxy acid dehydrogenase OS=Schizosaccharomyces pombe (strain 972 / ATCC 24843) OX=284812 GN=SPAC521.03 PE=1 SV=1	22.3284	21.467	21.6933	24.7611	25.2152	24.7047	3	14.3	28.148	14	2.89886	3.06408	10.0697
Q9P7R9	Q9P7R9	Pre-mRNA-splicing factor cwf3	cwf3	sp|Q9P7R9|SYF1_SCHPO Pre-mRNA-splicing factor cwf3 OS=Schizosaccharomyces pombe (strain 972 / ATCC 24843) OX=284812 GN=cwf3 PE=1 SV=1	23.1617	21.546	22.1988	25.4124	26.1178	25.9829	12	18	92.636	24	2.10624	3.53554	6.84298
Q9P7S7	Q9P7S7	Nucleolar protein 58	nop58	sp|Q9P7S7|NOP58_SCHPO Nucleolar protein 58 OS=Schizosaccharomyces pombe (strain 972 / ATCC 24843) OX=284812 GN=nop58 PE=1 SV=1	21.4791	21.7252	21.6114	26.7528	26.4718	26.5782	11	34.3	55.758	70	5.78418	4.99567	46.0605
Q9P7U2;G2TRN6	Q9P7U2;G2TRN6	Putative aryl-alcohol dehydrogenase C977.14c;Putative aryl-alcohol dehydrogenase C750.01	SPAC977.14c	sp|Q9P7U2|YI7E_SCHPO Putative aryl-alcohol dehydrogenase C977.14c OS=Schizosaccharomyces pombe (strain 972 / ATCC 24843) OX=284812 GN=SPAC977.14c PE=1 SV=1;sp|G2TRN6|YLZ1_SCHPO Putative aryl-alcohol dehydrogenase C750.01 OS=Schizosaccharomyces pombe (strai	22.6195	24.7069	25.3288	28.1127	28.4351	28.0608	12	45.6	39.914	55	1.42658	3.98446	4.81411
Q9UQW9	Q9UQW9	Ornithine decarboxylase	spe1	sp|Q9UQW9|DCOR_SCHPO Ornithine decarboxylase OS=Schizosaccharomyces pombe (strain 972 / ATCC 24843) OX=284812 GN=spe1 PE=2 SV=1	20.8901	20.9442	21.6624	26.1833	26.2127	26.5214	10	31	47.843	53	3.2495	5.14026	18.9395
Q9URY5	Q9URY5	Flavohemoprotein	SPAC869.02c	sp|Q9URY5|FHP_SCHPO Flavohemoprotein OS=Schizosaccharomyces pombe (strain 972 / ATCC 24843) OX=284812 GN=SPAC869.02c PE=3 SV=1	20.9997	20.4929	21.6674	24.0478	24.5273	23.7615	3	10.5	48.459	9	2.5314	3.0589	7.51754
Q9US06	Q9US06	RNA polymerase II-associated protein 1 homolog	SPAC664.03	sp|Q9US06|PAF1_SCHPO RNA polymerase II-associated protein 1 homolog OS=Schizosaccharomyces pombe (strain 972 / ATCC 24843) OX=284812 GN=SPAC664.03 PE=1 SV=2	21.9351	20.8386	22.2169	24.2167	24.1712	23.9515	3	11.8	51.189	6	1.60749	2.44962	5.71921
Q9US25	Q9US25	Chromodomain helicase hrp1	hrp1	sp|Q9US25|HRP1_SCHPO Chromodomain helicase hrp1 OS=Schizosaccharomyces pombe (strain 972 / ATCC 24843) OX=284812 GN=hrp1 PE=1 SV=1	20.7374	21.1207	21.5556	23.6407	23.815	24.008	7	6.3	158.55	11	2.5721	2.68333	10.3589
Q9USG9	Q9USG9	Probable tyrosyl-DNA phosphodiesterase	SPCP31B10.05	sp|Q9USG9|TYDP1_SCHPO Probable tyrosyl-DNA phosphodiesterase OS=Schizosaccharomyces pombe (strain 972 / ATCC 24843) OX=284812 GN=SPCP31B10.05 PE=3 SV=1	21.8192	20.8673	21.2252	25.9376	26.4447	26.3826	11	25.7	61.595	45	3.38339	4.95106	15.4603
Q9USL4	Q9USL4	Nucleoporin nup61	nup61	sp|Q9USL4|NUP61_SCHPO Nucleoporin nup61 OS=Schizosaccharomyces pombe (strain 972 / ATCC 24843) OX=284812 GN=nup61 PE=1 SV=2	22.0861	20.969	22.1356	26.8185	26.5961	26.7659	7	22.4	59.165	33	2.32854	4.99659	12.9197
Q9USZ6	Q9USZ6	Ribosome assembly factor mrt4	mrt4	sp|Q9USZ6|MRT4_SCHPO Ribosome assembly factor mrt4 OS=Schizosaccharomyces pombe (strain 972 / ATCC 24843) OX=284812 GN=mrt4 PE=3 SV=1	21.6421	21.3942	21.2243	24.7609	24.4872	24.4264	2	16.6	26.663	9	4.32291	3.13798	19.7292
Q9UTD1	Q9UTD1	mRNA 3-end-processing protein yth1	yth1	sp|Q9UTD1|YTH1_SCHPO mRNA 3-end-processing protein yth1 OS=Schizosaccharomyces pombe (strain 972 / ATCC 24843) OX=284812 GN=yth1 PE=3 SV=1	22.3234	20.6403	21.1789	26.3711	26.2791	26.016	3	25.9	19.379	12	2.09285	4.84121	9.53846
Q9UTE3	Q9UTE3	Rpb7-binding protein seb1	seb1	sp|Q9UTE3|SEB1_SCHPO Rpb7-binding protein seb1 OS=Schizosaccharomyces pombe (strain 972 / ATCC 24843) OX=284812 GN=seb1 PE=1 SV=3	21.3398	21.264	21.447	25.6748	25.5737	25.2925	6	18.1	66.439	24	4.01432	4.16343	33.0201
Q9UTH9	Q9UTH9	tRNA-dihydrouridine(47) synthase [NAD(P)(+)]	dus3	sp|Q9UTH9|DUS3_SCHPO tRNA-dihydrouridine(47) synthase [NAD(P)(+)] OS=Schizosaccharomyces pombe (strain 972 / ATCC 24843) OX=284812 GN=dus3 PE=3 SV=1	21.9795	22.1045	21.7544	28.8849	28.8861	28.6922	24	51.1	69.698	127	5.41641	6.87489	56.8124
Q9UTQ5	Q9UTQ5	Uncharacterized J domain-containing protein C1071.09c	SPAC1071.09c	sp|Q9UTQ5|YL39_SCHPO Uncharacterized J domain-containing protein C1071.09c OS=Schizosaccharomyces pombe (strain 972 / ATCC 24843) OX=284812 GN=SPAC1071.09c PE=3 SV=1	21.2099	22.5959	21.8175	24.5169	25.1803	25.0433	4	18.4	32.85	19	2.1598	3.03904	6.76563
Q9UTR8	Q9UTR8	Protein red1	red1	sp|Q9UTR8|RED1_SCHPO NURS complex subunit red1 OS=Schizosaccharomyces pombe (strain 972 / ATCC 24843) OX=284812 GN=red1 PE=1 SV=2	21.3752	21.8068	21.858	25.0184	24.4936	24.2549	5	11.7	79.488	11	3.07886	2.90899	10.6728
Q9UU77	Q9UU77	Ankyrin repeat-containing protein P1E11.10	SPCP1E11.10	sp|Q9UU77|YQMA_SCHPO Ankyrin repeat-containing protein P1E11.10 OS=Schizosaccharomyces pombe (strain 972 / ATCC 24843) OX=284812 GN=SPCP1E11.10 PE=4 SV=1	21.1353	21.5928	23.0316	24.5751	23.9565	24.1384	2	16.4	22.863	10	1.3417	2.30347	3.83857
Q9UUA7	Q9UUA7	UPF0590 protein C409.17c	SPBC409.17c	sp|Q9UUA7|YHAH_SCHPO UPF0590 protein C409.17c OS=Schizosaccharomyces pombe (strain 972 / ATCC 24843) OX=284812 GN=SPBC409.17c PE=3 SV=1	22.6416	20.3494	22.2024	26.2843	26.3028	25.8251	6	41.9	25.747	20	1.69147	4.4063	6.1235
Q9UUE5	Q9UUE5	Nucleoporin nup85	nup85	sp|Q9UUE5|NUP85_SCHPO Nucleoporin nup85 OS=Schizosaccharomyces pombe (strain 972 / ATCC 24843) OX=284812 GN=nup85 PE=1 SV=1	21.738	21.5618	21.4288	29.7799	29.2762	29.2785	17	37.8	78.021	106	4.5784	7.86868	41.4288
Q9UUG0	Q9UUG0	Fatty acid synthase subunit beta;3-hydroxyacyl-[acyl-carrier-protein] dehydratase;Enoyl-[acyl-carrier-protein] reductase [NADH];[Acyl-carrier-protein] acetyltransferase;[Acyl-carrier-protein] malonyltransferase;S-acyl fatty acid synthase thioesterase	fas1	sp|Q9UUG0|FAS1_SCHPO Fatty acid synthase subunit beta OS=Schizosaccharomyces pombe (strain 972 / ATCC 24843) OX=284812 GN=fas1 PE=1 SV=1	25.9086	25.5618	25.4835	25.0506	25.1458	24.9602	17	10.3	230.56	81	1.51618	-0.599089	-4.24373
Q9UUG1	Q9UUG1	Ribosome production factor 2 homolog	SPAC926.08c	sp|Q9UUG1|RPF2_SCHPO Ribosome production factor 2 homolog OS=Schizosaccharomyces pombe (strain 972 / ATCC 24843) OX=284812 GN=SPAC926.08c PE=1 SV=1	20.8711	21.7911	21.1348	23.4692	23.6784	23.2229	4	14.5	36.071	12	2.20198	2.19117	7.21803
Q9UUG8	Q9UUG8	Transcriptional repressor tup12	tup12	sp|Q9UUG8|TUP12_SCHPO Transcriptional repressor tup12 OS=Schizosaccharomyces pombe (strain 972 / ATCC 24843) OX=284812 GN=tup12 PE=1 SV=2	21.7202	21.6897	21.262	25.6692	25.3114	24.9494	4	12	65.56	15	3.62852	3.75274	14.7137
Q9UUI3	Q9UUI3	Pre-mRNA-splicing factor sap145	sap145	sp|Q9UUI3|SA145_SCHPO Pre-mRNA-splicing factor sap145 OS=Schizosaccharomyces pombe (strain 972 / ATCC 24843) OX=284812 GN=sap145 PE=1 SV=1	20.0467	22.2365	21.6209	25.7094	26.3065	25.9627	7	18.3	69.184	23	1.85342	4.69149	6.95484
Q9UUI4	Q9UUI4	Uncharacterized protein C22F8.09	SPAC22F8.09	sp|Q9UUI4|NOP53_SCHPO Ribosome biogenesis protein NOP53 OS=Schizosaccharomyces pombe (strain 972 / ATCC 24843) OX=284812 GN=rrp16 PE=1 SV=1	21.7344	21.881	20.892	25.024	24.9685	25.2874	2	7.2	48.129	10	2.39526	3.59086	11.1015
Q9Y700	Q9Y700	Elongation factor Tu, mitochondrial	tuf1	sp|Q9Y700|EFTU_SCHPO Elongation factor Tu, mitochondrial OS=Schizosaccharomyces pombe (strain 972 / ATCC 24843) OX=284812 GN=tuf1 PE=3 SV=1	25.3858	24.9648	25.2321	24.422	24.6914	24.5815	7	28.7	48.282	22	1.75013	-0.629261	-4.31767
Q9Y7N0	Q9Y7N0	SWR1 complex bromodomain subunit bdf1	bdf1	sp|Q9Y7N0|BDF1_SCHPO SWR1 complex bromodomain subunit bdf1 OS=Schizosaccharomyces pombe (strain 972 / ATCC 24843) OX=284812 GN=bdf1 PE=1 SV=1	21.4842	21.8461	21.9516	24.4305	25.072	24.7109	4	8.8	65.192	16	3.49069	2.97718	12.7521
Q9Y7Z1	Q9Y7Z1	Nucleolar protein 16	nop16	sp|Q9Y7Z1|NOP16_SCHPO Nucleolar protein 16 OS=Schizosaccharomyces pombe (strain 972 / ATCC 24843) OX=284812 GN=nop16 PE=3 SV=1	21.3252	20.824	21.8332	24.7314	24.4541	24.1474	4	29.7	23.946	7	2.69251	3.11681	9.25911
Q9Y823	Q9Y823	Homocitrate synthase, mitochondrial	lys4	sp|Q9Y823|HOSM_SCHPO Homocitrate synthase, mitochondrial OS=Schizosaccharomyces pombe (strain 972 / ATCC 24843) OX=284812 GN=lys4 PE=1 SV=1	26.4848	26.3307	26.7403	27.4002	26.9356	27.0618	9	32.3	46.292	67	1.5312	0.613923	3.35374
