# Supplementary material for: S. pombe Rtf2 is Important for Replication Fork Barrier Activity of RTS1 via Splicing of Rtf1
Source: bioRxiv preprint, doi:10.1101/2022.03.10.483798, version 1 (2022-03-10)
Supplement: STab3 [file 483798_file04.xlsx]

## Sheet: Biological Process
P-value cutoff	0.01
Regulation links followed	Yes
Bonferroni correction	508
Background size	5398
Min p-value	1.61691e-15
List size	149
GOID	TERM	CORRECTED_PVALUE	UNCORRECTED_PVALUE	NUM_LIST_ANNOTATIONS	NUM_BG_ANNOTATIONS	ANNOTATED_GENES
GO:0006396	RNA processing	8.21389e-13	1.61691e-15	50	542	bis1, brx1, cbc2, cdc28, cdc5, cft2, cwf15, cwf17, cwf2, cwf22, cwf3, cwf4, dbp10, dbp3, dus3, ebp2, esf1, gcd10, kri1, mrt4, noc3, nop14, nop56, nop58, prp16, prp19, prp22, prp39, prp45, red1, rna14, rps7, rsd1, sap114, sap145, seb1, sla1, snu66, SPAC20G8.09c, SPAC22F8.09, SPAC57A7.06, SPAC644.16, SPAC926.08c, SPBC725.08, SPBP8B7.15c, SPCC1672.07, srp2, tad2, usp107, yth1
GO:0016070	RNA metabolic process	7.51582e-11	1.47949e-13	71	1130	ash2, bis1, brf1, brx1, cbc2, cdc28, cdc5, cft2, clr6, cwf15, cwf17, cwf2, cwf22, cwf3, cwf4, dbp10, dbp3, dus3, ebp2, ercc3, esf1, gcd10, hrp1, kri1, mmi1, mrt4, noc3, nop14, nop56, nop58, nup85, ppk23, prp16, prp19, prp22, prp39, prp45, red1, rna14, rps7, rsd1, rvb1, sap114, sap145, seb1, sir2, sla1, snu66, SPAC20G8.09c, SPAC22F8.09, SPAC2G11.14, SPAC57A7.06, SPAC644.16, SPAC664.03, SPAC926.08c…
GO:0006397	mRNA processing	1.43544e-09	2.82568e-12	27	200	bis1, cbc2, cdc28, cdc5, cft2, cwf15, cwf17, cwf2, cwf22, cwf3, cwf4, prp16, prp19, prp22, prp39, prp45, rna14, rsd1, sap114, sap145, seb1, snu66, SPAC644.16, SPBP8B7.15c, srp2, usp107, yth1
GO:0022613	ribonucleoprotein complex biogenesis	5.06589e-09	9.97223e-12	40	452	brx1, cdc28, crm1, cwf2, cwf3, cwf4, dbp10, dbp3, ebp2, esf1, kri1, mrt4, noc3, nog1, nog2, nop14, nop16, nop56, nop58, nsp1, nup124, nup44, nup85, prp16, prp19, prp39, rps7, rvb1, sap145, sgd1, sks2, snu66, SPAC20G8.09c, SPAC22F8.09, SPAC57A7.06, SPAC926.08c, SPBC16E9.10c, SPCC1672.07, ubi2, usp107
GO:0090304	nucleic acid metabolic process	1.01326e-08	1.9946e-11	76	1390	ash2, bis1, brf1, brx1, cbc2, cdc17, cdc28, cdc5, cft2, clr6, cwf15, cwf17, cwf2, cwf22, cwf3, cwf4, dbp10, dbp3, dus3, ebp2, ercc3, esf1, gcd10, hrp1, kri1, mmi1, mrt4, noc3, nop14, nop56, nop58, nup85, ppk23, prp16, prp19, prp22, prp39, prp45, red1, rna14, rps7, rsd1, rtf2, rvb1, sap1, sap114, sap145, seb1, sir2, sla1, snu66, SPAC20G8.09c, SPAC22F8.09, SPAC2G11.14, SPAC57A7.06, SPAC644.16, SPAC…
GO:0016071	mRNA metabolic process	1.76657e-07	3.47749e-10	31	319	bis1, cbc2, cdc28, cdc5, cft2, cwf15, cwf17, cwf2, cwf22, cwf3, cwf4, mmi1, mrt4, prp16, prp19, prp22, prp39, prp45, red1, rna14, rsd1, sap114, sap145, seb1, snu66, SPAC644.16, SPBP8B7.15c, srp2, tif452, usp107, yth1
GO:0006725	cellular aromatic compound metabolic process	3.1355e-07	6.17224e-10	81	1642	ash2, bis1, brf1, brx1, cbc2, cdc17, cdc28, cdc5, cft2, clr6, cwf15, cwf17, cwf2, cwf22, cwf3, cwf4, dbp10, dbp3, dus3, ebp2, ercc3, esf1, gcd10, gua1, hrp1, kri1, mmi1, mpg1, mrt4, noc3, nop14, nop56, nop58, nup85, ppk23, prp16, prp19, prp22, prp39, prp45, red1, rna14, rps7, rsd1, rtf2, rvb1, sap1, sap114, sap145, seb1, sir2, sla1, snu66, SPAC20G8.09c, SPAC22F8.09, SPAC2G11.14, SPAC57A7.06, SPAC…
GO:0006139	nucleobase-containing compound metabolic process	3.18888e-07	6.27733e-10	79	1579	ash2, bis1, brf1, brx1, cbc2, cdc17, cdc28, cdc5, cft2, clr6, cwf15, cwf17, cwf2, cwf22, cwf3, cwf4, dbp10, dbp3, dus3, ebp2, ercc3, esf1, gcd10, gua1, hrp1, kri1, mmi1, mpg1, mrt4, noc3, nop14, nop56, nop58, nup85, ppk23, prp16, prp19, prp22, prp39, prp45, red1, rna14, rps7, rsd1, rtf2, rvb1, sap1, sap114, sap145, seb1, sir2, sla1, snu66, SPAC20G8.09c, SPAC22F8.09, SPAC2G11.14, SPAC57A7.06, SPAC…
GO:0044085	cellular component biogenesis	4.07819e-07	8.02794e-10	60	1024	ash2, brf1, brx1, cdc28, clr6, crm1, cwf2, cwf3, cwf4, dbp10, dbp3, ebp2, esf1, fkbp39, grx4, hrp1, imp1, kri1, mmi1, mpg1, mrt4, noc3, nog1, nog2, nop14, nop16, nop56, nop58, nsp1, nup124, nup44, nup85, pil1, pob3, prp16, prp19, prp39, red1, rps7, rvb1, sap145, sgd1, sid2, sir2, sks2, snu66, SPAC20G8.09c, SPAC22F8.09, SPAC2G11.14, SPAC57A7.06, SPAC664.03, SPAC926.08c, SPBC13E7.08c, SPBC16E9.10c,…
GO:0046483	heterocycle metabolic process	4.20523e-07	8.27801e-10	81	1651	ash2, bis1, brf1, brx1, cbc2, cdc17, cdc28, cdc5, cft2, clr6, cwf15, cwf17, cwf2, cwf22, cwf3, cwf4, dbp10, dbp3, dus3, ebp2, ercc3, esf1, gcd10, gua1, hrp1, kri1, mmi1, mpg1, mrt4, noc3, nop14, nop56, nop58, nup85, ppk23, prp16, prp19, prp22, prp39, prp45, red1, rna14, rps7, rsd1, rtf2, rvb1, sap1, sap114, sap145, seb1, sir2, sla1, snu66, SPAC20G8.09c, SPAC22F8.09, SPAC2G11.14, SPAC57A7.06, SPAC…
GO:0000377	RNA splicing, via transesterification reactions with bulged adenosine as nucleophile	7.44762e-07	1.46607e-09	21	159	bis1, cbc2, cdc28, cdc5, cwf15, cwf17, cwf2, cwf22, cwf3, cwf4, prp16, prp19, prp22, prp39, prp45, rsd1, sap114, sap145, snu66, srp2, usp107
GO:0000398	mRNA splicing, via spliceosome	7.44762e-07	1.46607e-09	21	159	bis1, cbc2, cdc28, cdc5, cwf15, cwf17, cwf2, cwf22, cwf3, cwf4, prp16, prp19, prp22, prp39, prp45, rsd1, sap114, sap145, snu66, srp2, usp107
GO:0000375	RNA splicing, via transesterification reactions	9.40832e-07	1.85203e-09	21	161	bis1, cbc2, cdc28, cdc5, cwf15, cwf17, cwf2, cwf22, cwf3, cwf4, prp16, prp19, prp22, prp39, prp45, rsd1, sap114, sap145, snu66, srp2, usp107
GO:0045292	mRNA cis splicing, via spliceosome	1.63541e-06	3.21931e-09	19	135	bis1, cbc2, cdc5, cwf15, cwf17, cwf2, cwf22, cwf3, cwf4, prp16, prp19, prp22, prp39, prp45, rsd1, sap114, snu66, srp2, usp107
GO:1901360	organic cyclic compound metabolic process	1.74821e-06	3.44135e-09	81	1696	ash2, bis1, brf1, brx1, cbc2, cdc17, cdc28, cdc5, cft2, clr6, cwf15, cwf17, cwf2, cwf22, cwf3, cwf4, dbp10, dbp3, dus3, ebp2, ercc3, esf1, gcd10, gua1, hrp1, kri1, mmi1, mpg1, mrt4, noc3, nop14, nop56, nop58, nup85, ppk23, prp16, prp19, prp22, prp39, prp45, red1, rna14, rps7, rsd1, rtf2, rvb1, sap1, sap114, sap145, seb1, sir2, sla1, snu66, SPAC20G8.09c, SPAC22F8.09, SPAC2G11.14, SPAC57A7.06, SPAC…
GO:0008380	RNA splicing	2.07165e-06	4.07805e-09	21	168	bis1, cbc2, cdc28, cdc5, cwf15, cwf17, cwf2, cwf22, cwf3, cwf4, prp16, prp19, prp22, prp39, prp45, rsd1, sap114, sap145, snu66, srp2, usp107
GO:0010467	gene expression	7.66209e-06	1.50829e-08	82	1778	ash2, bis1, brf1, brx1, cbc2, cdc28, cdc5, cft2, clr6, cwf15, cwf17, cwf2, cwf22, cwf3, cwf4, dbp10, dbp3, dus3, ebp2, eft201, ercc3, esf1, fma1, gcd10, grx4, hrp1, kri1, mmi1, mrt4, noc3, nop14, nop56, nop58, nup60, nup85, ppk23, prp16, prp19, prp22, prp39, prp45, red1, rna14, rpl1701, rpl2302, rps3, rps403, rps7, rsd1, rvb1, sap114, sap145, seb1, sir2, sla1, snu66, SPAC20G8.09c, SPAC22F8.09, SP…
GO:0042254	ribosome biogenesis	2.61493e-05	5.1475e-08	30	370	brx1, crm1, dbp10, dbp3, ebp2, esf1, kri1, mrt4, noc3, nog1, nog2, nop14, nop16, nop56, nop58, nsp1, nup124, nup44, nup85, rps7, sgd1, sks2, snu66, SPAC20G8.09c, SPAC22F8.09, SPAC57A7.06, SPAC926.08c, SPBC16E9.10c, SPCC1672.07, ubi2
GO:0034641	cellular nitrogen compound metabolic process	0.00078779	1.55077e-06	91	2267	ash2, bis1, brf1, brx1, cbc2, cdc17, cdc28, cdc5, cft2, clr6, cwf15, cwf17, cwf2, cwf22, cwf3, cwf4, dbp10, dbp3, dus3, ebp2, eft201, ercc3, esf1, gcd10, gua1, hrp1, kri1, mmi1, mpg1, mrt4, noc3, nop14, nop56, nop58, nup85, ppk23, prp16, prp19, prp22, prp39, prp45, red1, rna14, rpl1701, rpl2302, rps3, rps403, rps7, rsd1, rtf2, rvb1, sap1, sap114, sap145, seb1, sir2, sla1, snu66, SPAC20G8.09c, SPA…
GO:0071428	rRNA-containing ribonucleoprotein complex export from nucleus	0.00109708	2.15961e-06	8	33	crm1, nog1, nog2, nsp1, nup124, nup44, nup85, SPBC16E9.10c
GO:0034470	ncRNA processing	0.00260069	5.11946e-06	25	341	brx1, dbp10, dbp3, dus3, ebp2, esf1, gcd10, kri1, mrt4, noc3, nop14, nop56, nop58, red1, rps7, seb1, sla1, snu66, SPAC20G8.09c, SPAC22F8.09, SPAC57A7.06, SPAC926.08c, SPBC725.08, SPCC1672.07, tad2
GO:0034660	ncRNA metabolic process	0.00447915	8.81722e-06	27	398	brx1, dbp10, dbp3, dus3, ebp2, esf1, gcd10, kri1, mmi1, mrt4, noc3, nop14, nop56, nop58, red1, rps7, seb1, sla1, snu66, SPAC20G8.09c, SPAC22F8.09, SPAC57A7.06, SPAC926.08c, SPBC725.08, SPCC1672.07, spt5, tad2
GO:0071826	ribonucleoprotein complex subunit organization	0.00576442	1.13473e-05	15	148	brx1, cdc28, cwf2, cwf3, cwf4, mrt4, prp16, prp19, prp22, prp39, rvb1, sap145, SPAC22F8.09, SPAC926.08c, usp107
GO:0043933	protein-containing complex subunit organization	0.0079037	1.55585e-05	29	459	bdf1, brf1, brx1, cdc28, cwf2, cwf3, cwf4, fkbp39, hrp1, imp1, mmi1, mrt4, nup44, pob3, prp16, prp19, prp22, prp39, rvb1, sap145, sir2, SPAC22F8.09, SPAC2G11.14, SPAC664.03, SPAC926.08c, SPBC13E7.08c, sua7, swc5, usp107
GO:0051169	nuclear transport	0.00848204	1.66969e-05	13	117	crm1, imp1, nog1, nog2, nsp1, nup124, nup44, nup45, nup60, nup61, nup85, SPBC16E9.10c, SPBC1711.05
GO:0006913	nucleocytoplasmic transport	0.00848204	1.66969e-05	13	117	crm1, imp1, nog1, nog2, nsp1, nup124, nup44, nup45, nup60, nup61, nup85, SPBC16E9.10c, SPBC1711.05

## Sheet: Cell Component
P-value cutoff	0.01
Regulation links followed	Yes
Bonferroni correction	119
Background size	5398
Min p-value	2.25992e-21
List size	149
GOID	TERM	CORRECTED_PVALUE	UNCORRECTED_PVALUE	NUM_LIST_ANNOTATIONS	NUM_BG_ANNOTATIONS	ANNOTATED_GENES
GO:0005634	nucleus	2.6893e-19	2.25992e-21	129	2706	ash2, bdf1, bis1, brf1, brx1, cbc2, cct3, cdc17, cdc28, cdc37, cdc5, cft2, clr6, crm1, csn1, cwf15, cwf17, cwf2, cwf22, cwf3, cwf4, dbp10, dbp3, dus3, ebp2, eca39, ekc1, ercc3, esf1, fes1, fkbp39, fma1, gcd10, gln1, gpd1, grx4, hrp1, imp1, kri1, lys4, mmi1, mrt4, mxr1, noc3, nog1, nog2, nop14, nop16, nop56, nop58, nsp1, nup124, nup44, nup45, nup60, nup61, nup85, pho2, pob3, ppk23, prp16, prp19, p…
GO:0140513	nuclear protein-containing complex	1.6657e-12	1.39975e-14	58	752	ash2, bdf1, bis1, cbc2, cdc28, cdc5, cft2, clr6, crm1, csn1, cwf15, cwf17, cwf2, cwf22, cwf3, cwf4, ercc3, imp1, mmi1, noc3, nop14, nop56, nsp1, nup124, nup44, nup45, nup60, nup61, nup85, pob3, prp16, prp19, prp22, prp39, prp45, red1, rna14, rsd1, rvb1, sap114, sap145, seb1, snu66, SPAC2G11.14, SPAC644.16, SPAC664.03, SPBC13E7.08c, SPBC725.08, SPBP8B7.15c, SPCC1672.07, SPCC1906.02c, spt20, spt5, …
GO:1990904	ribonucleoprotein complex	2.4075e-10	2.02311e-12	46	557	bis1, cbc2, cdc28, cdc5, cwf15, cwf17, cwf2, cwf22, cwf3, cwf4, ebp2, eft201, kri1, mmi1, mrt4, noc3, nop14, nop16, nop56, nop58, prp16, prp19, prp22, prp39, prp45, red1, rpl1701, rpl2302, rps3, rps403, rps7, rsd1, sap114, sap145, seb1, sla1, snu66, SPAC20G8.09c, SPAC57A7.06, SPAC644.16, SPAC926.08c, SPCC1672.07, srp72, ssa2, ubi2, usp107
GO:0005681	spliceosomal complex	3.66711e-10	3.08161e-12	21	116	bis1, cbc2, cdc28, cdc5, cwf15, cwf17, cwf2, cwf22, cwf3, cwf4, prp16, prp19, prp22, prp39, prp45, rsd1, sap114, sap145, snu66, ssa2, usp107
GO:0031981	nuclear lumen	7.03897e-10	5.9151e-12	52	713	ash2, bdf1, brx1, cdc17, clr6, crm1, dbp10, dbp3, ebp2, ekc1, ercc3, esf1, fkbp39, fma1, imp1, kri1, mmi1, mrt4, noc3, nog1, nog2, nop14, nop16, nop56, nop58, nsp1, nup44, nup45, nup61, nup85, pob3, red1, rps7, rvb1, sgd1, SPAC1071.09c, SPAC20G8.09c, SPAC22F8.09, SPAC2G11.14, SPAC57A7.06, SPAC664.03, SPAC926.08c, SPBC13E7.08c, SPBC16E9.10c, SPBC1711.05, SPBC725.08, SPCC1672.07, spt20, spt5, swc5,…
GO:0032991	protein-containing complex	7.17438e-08	6.02889e-10	92	2006	ash2, bdf1, bis1, brf1, cbc2, cct3, cct8, cdc28, cdc5, cft2, clr6, crm1, csn1, cwf15, cwf17, cwf2, cwf22, cwf3, cwf4, ebp2, eft201, ekc1, ercc3, fas1, gcd10, gpd1, imp1, kri1, mmi1, mrt4, noc3, nop14, nop16, nop56, nop58, nsp1, nup124, nup44, nup45, nup60, nup61, nup85, pil1, pob3, prp16, prp19, prp22, prp39, prp45, red1, rna14, rpl1701, rpl2302, rpn3, rps3, rps403, rps7, rsd1, rvb1, sap114, sap1…
GO:0071014	post-mRNA release spliceosomal complex	2.59343e-07	2.17935e-09	12	46	bis1, cdc5, cwf15, cwf17, cwf2, cwf3, cwf4, prp19, prp22, prp45, sap145, ssa2
GO:0043233	organelle lumen	3.67799e-06	3.09075e-08	56	1008	ash2, bdf1, brx1, cdc17, clr6, crm1, cta1, dbp10, dbp3, ebp2, eca39, ekc1, ercc3, esf1, fkbp39, fma1, imp1, kri1, mmi1, mrt4, noc3, nog1, nog2, nop14, nop16, nop56, nop58, nsp1, nup44, nup45, nup61, nup85, pob3, red1, rps7, rvb1, sgd1, SPAC1071.09c, SPAC20G8.09c, SPAC22F8.09, SPAC2G11.14, SPAC57A7.06, SPAC664.03, SPAC926.08c, SPAC9E9.09c, SPBC13E7.08c, SPBC16E9.10c, SPBC1711.05, SPBC725.08, SPCC1…
GO:0031974	membrane-enclosed lumen	3.67799e-06	3.09075e-08	56	1008	ash2, bdf1, brx1, cdc17, clr6, crm1, cta1, dbp10, dbp3, ebp2, eca39, ekc1, ercc3, esf1, fkbp39, fma1, imp1, kri1, mmi1, mrt4, noc3, nog1, nog2, nop14, nop16, nop56, nop58, nsp1, nup44, nup45, nup61, nup85, pob3, red1, rps7, rvb1, sgd1, SPAC1071.09c, SPAC20G8.09c, SPAC22F8.09, SPAC2G11.14, SPAC57A7.06, SPAC664.03, SPAC926.08c, SPAC9E9.09c, SPBC13E7.08c, SPBC16E9.10c, SPBC1711.05, SPBC725.08, SPCC1…
GO:0070013	intracellular organelle lumen	3.67799e-06	3.09075e-08	56	1008	ash2, bdf1, brx1, cdc17, clr6, crm1, cta1, dbp10, dbp3, ebp2, eca39, ekc1, ercc3, esf1, fkbp39, fma1, imp1, kri1, mmi1, mrt4, noc3, nog1, nog2, nop14, nop16, nop56, nop58, nsp1, nup44, nup45, nup61, nup85, pob3, red1, rps7, rvb1, sgd1, SPAC1071.09c, SPAC20G8.09c, SPAC22F8.09, SPAC2G11.14, SPAC57A7.06, SPAC664.03, SPAC926.08c, SPAC9E9.09c, SPBC13E7.08c, SPBC16E9.10c, SPBC1711.05, SPBC725.08, SPCC1…
GO:0071013	catalytic step 2 spliceosome	4.15438e-06	3.49107e-08	10	37	bis1, cwf15, cwf2, cwf22, cwf3, cwf4, prp19, prp22, sap114, sap145
GO:0000974	Prp19 complex	1.17262e-05	9.85395e-08	7	16	cdc5, cwf15, cwf2, cwf3, cwf4, prp19, prp45
GO:0005684	U2-type spliceosomal complex	1.18716e-05	9.97616e-08	12	63	cbc2, cwf2, cwf22, cwf3, cwf4, prp16, prp19, prp22, prp39, sap114, sap145, usp107
GO:0005730	nucleolus	5.9217e-05	4.97622e-07	28	365	brx1, dbp10, dbp3, ebp2, esf1, fkbp39, fma1, imp1, kri1, mrt4, noc3, nog1, nog2, nop14, nop16, nop56, nop58, rps7, sgd1, SPAC1071.09c, SPAC20G8.09c, SPAC22F8.09, SPAC57A7.06, SPAC926.08c, SPBC16E9.10c, SPBC1711.05, SPCC1672.07, ubi2
GO:0005654	nucleoplasm	0.000968419	8.13797e-06	20	241	ash2, bdf1, clr6, ekc1, ercc3, imp1, mmi1, pob3, red1, rvb1, SPAC22F8.09, SPAC2G11.14, SPAC664.03, SPBC13E7.08c, SPBC1711.05, SPBC725.08, spt20, spt5, swc5, tfg1
GO:0005643	nuclear pore	0.000982856	8.25929e-06	9	51	crm1, imp1, nsp1, nup124, nup44, nup45, nup60, nup61, nup85
GO:0030684	preribosome	0.00237805	1.99836e-05	12	102	ebp2, kri1, mrt4, noc3, nop14, nop16, nop56, nop58, rps7, SPAC20G8.09c, SPAC57A7.06, SPCC1672.07
GO:0097550	transcription preinitiation complex	0.00245389	2.06209e-05	3	3	brf1, ercc3, sua7
GO:0005847	mRNA cleavage and polyadenylation specificity factor complex	0.00609158	5.11898e-05	5	16	cft2, rna14, SPAC644.16, SPBP8B7.15c, yth1
GO:0034399	nuclear periphery	0.00773434	6.49945e-05	8	51	crm1, ebp2, imp1, nsp1, nup44, nup45, nup61, nup85

## Sheet: Molecular Function
P-value cutoff	0.01
Regulation links followed	Yes
Bonferroni correction	144
Background size	5398
Min p-value	1.4361e-07
List size	149
GOID	TERM	CORRECTED_PVALUE	UNCORRECTED_PVALUE	NUM_LIST_ANNOTATIONS	NUM_BG_ANNOTATIONS	ANNOTATED_GENES
GO:0005488	binding	2.06799e-05	1.4361e-07	112	2955	ash2, bis1, brf1, brx1, cbc2, cct3, cct8, cdc17, cdc28, cdc37, cdc5, cft2, clr6, crm1, cta1, cwf15, cwf2, cwf22, dbp10, dbp3, dus3, ebp2, eca39, eft201, ekc1, ercc3, esf1, fes1, fkbp39, fma1, gcd10, gln1, gpd1, grx4, gua1, hrp1, imp1, leu1, lys4, mmi1, noc3, nog1, nog2, nop14, nop56, nop58, nsp1, nup124, nup45, nup85, pil1, pob3, ppk23, prp16, prp19, prp22, prp39, prp45, red1, rna14, rpl2302, rps…
GO:1901363	heterocyclic compound binding	3.21067e-05	2.22963e-07	78	1743	ash2, brf1, brx1, cbc2, cct3, cct8, cdc17, cdc28, cdc5, cft2, crm1, cta1, cwf15, cwf2, cwf22, dbp10, dbp3, dus3, eca39, eft201, ercc3, esf1, fes1, fkbp39, gcd10, gln1, gpd1, hrp1, imp1, leu1, mmi1, nog1, nog2, nop14, nop56, nop58, pob3, ppk23, prp16, prp22, prp39, rna14, rpl2302, rps3, rps403, rsd1, rvb1, sap1, sap114, sap145, seb1, sgd1, sid2, sir2, sks2, sla1, SPAC20G8.09c, SPAC22F8.09, SPAC57A…
GO:0097159	organic cyclic compound binding	4.18869e-05	2.90881e-07	78	1753	ash2, brf1, brx1, cbc2, cct3, cct8, cdc17, cdc28, cdc5, cft2, crm1, cta1, cwf15, cwf2, cwf22, dbp10, dbp3, dus3, eca39, eft201, ercc3, esf1, fes1, fkbp39, gcd10, gln1, gpd1, hrp1, imp1, leu1, mmi1, nog1, nog2, nop14, nop56, nop58, pob3, ppk23, prp16, prp22, prp39, rna14, rpl2302, rps3, rps403, rsd1, rvb1, sap1, sap114, sap145, seb1, sgd1, sid2, sir2, sks2, sla1, SPAC20G8.09c, SPAC22F8.09, SPAC57A…
GO:0003723	RNA binding	5.29612e-05	3.67786e-07	44	748	brx1, cbc2, cdc28, cft2, cwf15, cwf2, cwf22, dbp10, dbp3, eft201, esf1, gcd10, mmi1, nop14, nop56, nop58, prp16, prp22, prp39, rna14, rpl2302, rps3, rps403, rsd1, sap114, sap145, seb1, sgd1, sla1, SPAC20G8.09c, SPAC22F8.09, SPAC57A7.06, SPAC644.16, SPAC926.08c, SPBC13E7.08c, SPBC16A3.08c, spt5, srp2, srp72, tif452, tuf1, usp107, vip1, zta1
GO:0017056	structural constituent of nuclear pore	0.00162144	1.126e-05	6	20	nsp1, nup124, nup44, nup45, nup60, nup85
GO:0003676	nucleic acid binding	0.00193872	1.34633e-05	53	1114	ash2, brf1, brx1, cbc2, cdc17, cdc28, cdc5, cft2, cwf15, cwf2, cwf22, dbp10, dbp3, eft201, ercc3, esf1, gcd10, hrp1, mmi1, nop14, nop56, nop58, pob3, prp16, prp22, prp39, rna14, rpl2302, rps3, rps403, rsd1, sap1, sap114, sap145, seb1, sgd1, sla1, SPAC20G8.09c, SPAC22F8.09, SPAC57A7.06, SPAC644.16, SPAC926.08c, SPBC13E7.08c, SPBC16A3.08c, SPCP31B10.05, spt5, srp2, srp72, tif452, tuf1, usp107, vip1…
