# Supplementary material for: S. pombe Rtf2 is Important for Replication Fork Barrier Activity of RTS1 via Splicing of Rtf1
Source: bioRxiv preprint, doi:10.1101/2022.03.10.483798, version 1 (2022-03-10)
Supplement: STab5 [file 483798_file06.xlsx]

## Sheet: SupplementaryTable5-Intron_Rete
Gene	Gene Name	Intron	Chromosome.x	Start	End	Strand	Repeat	Intron Reads rtf2	Next Exon Reads rtf2	Fraction Next Exon rtf2	Intron Reads WT	Next Exon Reads WT	Fraction Next Exon WT
SPAC1002.07c	ats1	1	I	1808919	1809165	-	2	0	2	0	1	3	0.333333
SPAC1002.07c	ats1	1	I	1808919	1809165	-	1	0	2	0	1	2	0.5
SPAC1002.07c	ats1	1	I	1808919	1809165	-	3	0	5	0	0	3	0
SPAC1002.07c	ats1	2	I	1808742	1808799	-	1	0	7	0	0	4	0
SPAC1002.07c	ats1	2	I	1808742	1808799	-	3	0	8	0	0	10	0
SPAC1002.07c	ats1	2	I	1808742	1808799	-	2	0	8	0	0	6	0
SPAC1002.07c	ats1	3	I	1808661	1808706	-	1	1	11	0.0909091	3	7	0.428571
SPAC1002.07c	ats1	3	I	1808661	1808706	-	2	1	11	0.0909091	1	6	0.166667
SPAC1002.07c	ats1	3	I	1808661	1808706	-	3	0	10	0	2	12	0.166667
SPAC1002.07c	ats1	4	I	1808539	1808629	-	2	0	14	0	0	7	0
SPAC1002.07c	ats1	4	I	1808539	1808629	-	3	0	13	0	0	14	0
SPAC1002.07c	ats1	4	I	1808539	1808629	-	1	0	14	0	3	8	0.375
SPAC1002.07c	ats1	5	I	1808377	1808427	-	1	0	15	0	3	10	0.3
SPAC1002.07c	ats1	5	I	1808377	1808427	-	3	0	16	0	1	20	0.05
SPAC1002.07c	ats1	5	I	1808377	1808427	-	2	1	20	0.05	0	13	0
SPAC1002.15c	med6	3	I	1826424	1826464	-	2	1	4	0.25	0	2	0
SPAC1006.03c	red1	3	I	5071418	5071461	-	1	2	2	1	1	2	0.5
SPAC1006.6	rgf2	2	I	5084085	5084128	+	2	1	2	0.5	0	4	0
SPAC1006.8	etd1	1	I	5088999	5089060	+	3	0	5	0	0	4	0
SPAC1006.8	etd1	1	I	5088999	5089060	+	1	0	2	0	0	3	0
SPAC1039.05c	klf1	3	I	5457827	5457871	-	3	0	3	0	0	4	0
SPAC1039.05c	klf1	4	I	5457473	5457527	-	2	0	2	0	0	2	0
SPAC1039.05c	klf1	4	I	5457473	5457527	-	3	0	4	0	0	8	0
SPAC1039.05c	klf1	5	I	5456789	5456839	-	3	0	7	0	0	8	0
SPAC1039.05c	klf1	5	I	5456789	5456839	-	2	0	8	0	0	2	0
SPAC105.02c		2	I	1744951	1745234	-	2	0	2	0	0	6	0
SPAC105.02c		2	I	1744951	1745234	-	3	0	3	0	0	3	0
SPAC1071.01c	pta1	1	I	3855791	3855791	-	3	0	5	0	0	2	0
SPAC1071.8	rpp203	1	I	3869454	3869547	+	2	0	4	0	0	5	0
SPAC1071.8	rpp203	1	I	3869454	3869547	+	1	0	4	0	0	4	0
SPAC1071.8	rpp203	1	I	3869454	3869547	+	3	0	7	0	0	2	0
SPAC1093.04c	cca1	3	I	4617282	4617352	-	3	0	2	0	0	2	0
SPAC1093.04c	cca1	4	I	4616624	4616667	-	2	0	3	0	0	4	0
SPAC1093.04c	cca1	4	I	4616624	4616667	-	3	0	7	0	0	5	0
SPAC1093.04c	cca1	4	I	4616624	4616667	-	1	1	7	0.142857	0	3	0
SPAC10F6.03c	cts1	1	I	1211985	1212204	-	3	1	57	0.0175439	0	48	0
SPAC10F6.03c	cts1	1	I	1211985	1212204	-	2	0	55	0	0	31	0
SPAC10F6.03c	cts1	1	I	1211985	1212204	-	1	1	63	0.015873	0	40	0
SPAC10F6.16	igo1	1	I	1238980	1239024	+	1	1	2	0.5	0	2	0
SPAC10F6.16	igo1	2	I	1239109	1239172	+	2	1	3	0.333333	2	4	0.5
SPAC10F6.16	igo1	2	I	1239109	1239172	+	3	0	5	0	1	3	0.333333
SPAC10F6.16	igo1	2	I	1239109	1239172	+	1	2	4	0.5	0	3	0
SPAC110.3	cdc42	1	I	1916156	1916318	+	1	1	8	0.125	0	6	0
SPAC110.3	cdc42	2	I	1916388	1916817	+	2	0	10	0	0	2	0
SPAC110.3	cdc42	2	I	1916388	1916817	+	1	0	12	0	0	6	0
SPAC110.3	cdc42	2	I	1916388	1916817	+	3	0	9	0	0	3	0
SPAC110.04c	pss1	1	I	1920202	1920606	-	3	0	5	0	0	7	0
SPAC110.04c	pss1	1	I	1920202	1920606	-	1	0	20	0	0	11	0
SPAC110.04c	pss1	1	I	1920202	1920606	-	2	0	8	0	0	3	0
SPAC1142.02c	sgt2	1	I	3628744	3628783	-	3	0	2	0	1	6	0.166667
SPAC1142.02c	sgt2	1	I	3628744	3628783	-	1	0	2	0	0	2	0
SPAC1142.02c	sgt2	2	I	3628075	3628122	-	3	1	20	0.05	2	24	0.0833333
SPAC1142.02c	sgt2	2	I	3628075	3628122	-	1	2	12	0.166667	0	10	0
SPAC1142.02c	sgt2	2	I	3628075	3628122	-	2	1	8	0.125	0	12	0
SPAC11D3.04c		1	I	113368	113434	-	3	0	4	0	0	10	0
SPAC11D3.04c		1	I	113368	113434	-	1	0	9	0	0	12	0
SPAC11D3.04c		1	I	113368	113434	-	2	0	2	0	0	10	0
SPAC11E3.3	csm1	2	I	5286563	5286608	+	3	0	2	0	0	3	0
SPAC11E3.3	csm1	3	I	5286822	5286876	+	3	0	7	0	0	6	0
SPAC11E3.3	csm1	3	I	5286822	5286876	+	1	0	5	0	0	3	0
SPAC11E3.3	csm1	3	I	5286822	5286876	+	2	0	2	0	0	6	0
SPAC11E3.04c	ubc13	2	I	5287699	5287850	-	2	1	2	0.5	0	3	0
SPAC11E3.04c	ubc13	3	I	5287557	5287613	-	1	0	15	0	0	4	0
SPAC11E3.04c	ubc13	3	I	5287557	5287613	-	2	0	5	0	0	7	0
SPAC11E3.04c	ubc13	3	I	5287557	5287613	-	3	0	2	0	0	10	0
SPAC11E3.10		1	I	5300844	5300924	+	2	0	3	0	0	3	0
SPAC11E3.10		1	I	5300844	5300924	+	1	0	5	0	0	10	0
SPAC11E3.10		1	I	5300844	5300924	+	3	0	7	0	0	4	0
SPAC11E3.10		2	I	5300949	5301115	+	1	5	9	0.555556	1	14	0.0714286
SPAC11E3.10		2	I	5300949	5301115	+	2	3	7	0.428571	1	6	0.166667
SPAC11E3.10		2	I	5300949	5301115	+	3	7	10	0.7	3	7	0.428571
SPAC11E3.10		3	I	5301303	5301349	+	2	0	11	0	0	9	0
SPAC11E3.10		3	I	5301303	5301349	+	3	0	11	0	0	8	0
SPAC11E3.10		3	I	5301303	5301349	+	1	0	14	0	0	16	0
SPAC11E3.10		4	I	5301380	5301456	+	1	2	16	0.125	1	18	0.0555556
SPAC11E3.10		4	I	5301380	5301456	+	3	2	16	0.125	1	12	0.0833333
SPAC11E3.10		4	I	5301380	5301456	+	2	0	16	0	0	11	0
SPAC11E3.12		1	I	5306044	5306102	+	2	0	2	0	0	2	0
SPAC11E3.12		1	I	5306044	5306102	+	1	0	5	0	1	6	0.166667
SPAC11E3.12		2	I	5306266	5306314	+	3	0	4	0	0	3	0
SPAC11E3.12		2	I	5306266	5306314	+	2	0	4	0	1	6	0.166667
SPAC11E3.12		2	I	5306266	5306314	+	1	1	11	0.0909091	1	7	0.142857
SPAC11E3.12		3	I	5307049	5307094	+	3	0	15	0	0	10	0
SPAC11E3.12		3	I	5307049	5307094	+	1	0	20	0	0	11	0
SPAC11E3.12		3	I	5307049	5307094	+	2	0	10	0	0	12	0
SPAC11E3.15	rpl22	1	I	5314868	5314913	+	2	5	33	0.151515	4	50	0.08
SPAC11E3.15	rpl22	1	I	5314868	5314913	+	3	3	37	0.0810811	3	46	0.0652174
SPAC11E3.15	rpl22	1	I	5314868	5314913	+	1	17	85	0.2	11	87	0.126437
SPAC11E3.15	rpl22	2	I	5315166	5315221	+	3	2	37	0.0540541	0	46	0
SPAC11E3.15	rpl22	2	I	5315166	5315221	+	2	1	33	0.030303	0	50	0
SPAC11E3.15	rpl22	2	I	5315166	5315221	+	1	5	85	0.0588235	1	87	0.0114943
SPAC11G7.2	pub1	3	I	3963610	3963751	+	3	0	2	0	0	4	0
SPAC11G7.2	pub1	3	I	3963610	3963751	+	2	0	5	0	0	3	0
SPAC11H11.02c	mug162	1	I	4778148	4778253	-	1	1	4	0.25	0	6	0
SPAC11H11.02c	mug162	2	I	4777957	4778008	-	1	0	6	0	0	7	0
SPAC11H11.02c	mug162	3	I	4777499	4777536	-	3	1	7	0.142857	0	4	0
SPAC11H11.02c	mug162	3	I	4777499	4777536	-	1	2	10	0.2	0	9	0
SPAC11H11.03c		1	I	4780186	4780240	-	3	0	6	0	0	3	0
SPAC11H11.03c		1	I	4780186	4780240	-	2	1	2	0.5	0	3	0
SPAC11H11.03c		1	I	4780186	4780240	-	1	1	5	0.2	0	2	0
SPAC11H11.03c		2	I	4779668	4780022	-	2	0	2	0	1	3	0.333333
SPAC11H11.03c		2	I	4779668	4780022	-	1	2	5	0.4	0	2	0
SPAC11H11.03c		2	I	4779668	4780022	-	3	2	6	0.333333	1	3	0.333333
SPAC11H11.03c		3	I	4779485	4779522	-	2	1	5	0.2	1	4	0.25
SPAC11H11.03c		3	I	4779485	4779522	-	3	2	10	0.2	1	4	0.25
SPAC11H11.03c		3	I	4779485	4779522	-	1	5	12	0.416667	1	4	0.25
SPAC11H11.05c	fta6	1	I	4782196	4782242	-	1	0	3	0	0	4	0
SPAC11H11.6	arp2	1	I	4783103	4783152	+	2	0	4	0	0	4	0
SPAC11H11.6	arp2	1	I	4783103	4783152	+	1	1	20	0.05	0	5	0
SPAC1250.3	ubc14	1	I	5098714	5098774	-	1	0	7	0	0	10	0
SPAC1250.3	ubc14	1	I	5098714	5098774	-	3	0	6	0	0	4	0
SPAC1250.3	ubc14	1	I	5098714	5098774	-	2	1	9	0.111111	0	6	0
SPAC1250.3	ubc14	2	I	5098406	5098506	-	1	0	13	0	0	11	0
SPAC1250.3	ubc14	2	I	5098406	5098506	-	3	0	10	0	0	6	0
SPAC1250.3	ubc14	2	I	5098406	5098506	-	2	1	11	0.0909091	0	8	0
SPAC1250.5	rpl3002	1	I	5095302	5095547	-	2	4	61	0.0655738	10	57	0.175439
SPAC1250.5	rpl3002	1	I	5095302	5095547	-	1	18	99	0.181818	14	72	0.194444
SPAC1250.5	rpl3002	1	I	5095302	5095547	-	3	7	55	0.127273	7	78	0.0897436
SPAC1296.01c		3	I	709645	709744	-	1	0	5	0	0	4	0
SPAC1296.01c		3	I	709645	709744	-	3	0	3	0	0	3	0
SPAC1296.01c		4	I	709340	709427	-	1	1	7	0.142857	0	4	0
SPAC1296.01c		4	I	709340	709427	-	2	0	5	0	0	2	0
SPAC1296.01c		4	I	709340	709427	-	3	0	3	0	0	3	0
SPAC1296.01c		5	I	708932	708978	-	3	0	5	0	0	5	0
SPAC1296.01c		5	I	708932	708978	-	1	1	7	0.142857	1	7	0.142857
SPAC1296.01c		5	I	708932	708978	-	2	1	5	0.2	0	2	0
SPAC1296.01c		6	I	708128	708167	-	3	3	21	0.142857	1	27	0.037037
SPAC1296.01c		6	I	708128	708167	-	1	5	27	0.185185	1	21	0.047619
SPAC1296.01c		6	I	708128	708167	-	2	2	29	0.0689655	1	13	0.0769231
SPAC1296.2	cox4	1	I	711413	711767	+	1	0	50	0	0	42	0
SPAC1296.2	cox4	1	I	711413	711767	+	3	0	64	0	0	54	0
SPAC1296.2	cox4	1	I	711413	711767	+	2	0	47	0	0	42	0
SPAC1296.4	mug65	1	I	715536	715582	+	1	1	3	0.333333	0	2	0
SPAC1296.4	mug65	2	I	715722	715993	+	1	0	4	0	0	2	0
SPAC1296.4	mug65	3	I	716147	716222	+	1	0	6	0	0	2	0
SPAC1296.4	mug65	3	I	716147	716222	+	2	0	6	0	0	3	0
SPAC1296.05c	lcp1	1	I	717586	717673	-	3	1	6	0.166667	0	5	0
SPAC1296.05c	lcp1	1	I	717586	717673	-	1	1	7	0.142857	0	13	0
SPAC1296.05c	lcp1	1	I	717586	717673	-	2	0	4	0	0	5	0
SPAC1296.6	tah18	4	I	720025	720065	+	3	0	2	0	1	2	0.5
SPAC12B10.4	pby1	1	I	4581784	4581835	+	3	0	10	0	2	6	0.333333
SPAC12B10.4	pby1	1	I	4581784	4581835	+	2	1	8	0.125	0	6	0
SPAC12B10.4	pby1	1	I	4581784	4581835	+	1	2	10	0.2	1	14	0.0714286
SPAC12B10.4	pby1	2	I	4581920	4581977	+	3	10	44	0.227273	1	43	0.0232558
SPAC12B10.4	pby1	2	I	4581920	4581977	+	1	17	58	0.293103	2	47	0.0425532
SPAC12B10.4	pby1	2	I	4581920	4581977	+	2	10	33	0.30303	3	54	0.0555556
SPAC12B10.5	icp55	10	I	4583962	4584010	+	1	1	4	0.25	0	3	0
SPAC12B10.5	icp55	11	I	4584119	4584162	+	1	7	38	0.184211	1	29	0.0344828
SPAC12B10.5	icp55	11	I	4584119	4584162	+	3	8	53	0.150943	1	38	0.0263158
SPAC12B10.5	icp55	11	I	4584119	4584162	+	2	7	39	0.179487	0	26	0
SPAC12B10.5	icp55	9	I	4583697	4583739	+	1	2	4	0.5	0	3	0
SPAC12B10.06c	emi5	1	I	4584677	4584732	-	2	1	10	0.1	0	15	0
SPAC12B10.06c	emi5	1	I	4584677	4584732	-	3	2	15	0.133333	1	18	0.0555556
SPAC12B10.06c	emi5	1	I	4584677	4584732	-	1	3	12	0.25	1	5	0.2
SPAC12B10.7	acp1	1	I	4585325	4585370	+	3	0	2	0	0	11	0
SPAC12B10.7	acp1	1	I	4585325	4585370	+	1	1	15	0.0666667	1	9	0.111111
SPAC12B10.7	acp1	1	I	4585325	4585370	+	2	1	5	0.2	1	3	0.333333
SPAC12B10.7	acp1	2	I	4585565	4585628	+	3	2	18	0.111111	0	14	0
SPAC12B10.7	acp1	2	I	4585565	4585628	+	2	0	11	0	0	12	0
SPAC12B10.7	acp1	2	I	4585565	4585628	+	1	2	31	0.0645161	0	17	0
SPAC12B10.9	pet801	1	I	4588511	4588566	+	1	0	3	0	0	3	0
SPAC12B10.9	pet801	2	I	4588724	4588868	+	3	0	4	0	0	3	0
SPAC12B10.9	pet801	2	I	4588724	4588868	+	1	0	6	0	0	4	0
SPAC12B10.9	pet801	2	I	4588724	4588868	+	2	1	3	0.333333	0	3	0
SPAC12B10.9	pet801	3	I	4589324	4589409	+	1	1	17	0.0588235	0	15	0
SPAC12B10.9	pet801	3	I	4589324	4589409	+	2	2	11	0.181818	1	7	0.142857
SPAC12B10.9	pet801	3	I	4589324	4589409	+	3	0	17	0	0	13	0
SPAC12B10.13	gid8	1	I	4596540	4596603	+	2	0	4	0	0	2	0
SPAC12B10.13	gid8	1	I	4596540	4596603	+	1	0	2	0	0	5	0
SPAC12B10.13	gid8	1	I	4596540	4596603	+	3	0	3	0	0	3	0
SPAC12B10.13	gid8	2	I	4596800	4596843	+	2	4	9	0.444444	0	5	0
SPAC12B10.13	gid8	2	I	4596800	4596843	+	1	5	9	0.555556	3	14	0.214286
SPAC12B10.13	gid8	2	I	4596800	4596843	+	3	3	9	0.333333	1	8	0.125
SPAC12B10.16c	mug157	1	I	4602982	4603146	-	1	0	4	0	0	4	0
SPAC12G12.2	efg1	1	I	346440	346543	-	2	0	3	0	0	5	0
SPAC12G12.2	efg1	1	I	346440	346543	-	3	0	4	0	0	5	0
SPAC12G12.2	efg1	1	I	346440	346543	-	1	1	7	0.142857	0	5	0
SPAC12G12.2	efg1	2	I	346245	346306	-	2	3	8	0.375	0	8	0
SPAC12G12.2	efg1	2	I	346245	346306	-	3	7	16	0.4375	0	17	0
SPAC12G12.2	efg1	2	I	346245	346306	-	1	8	18	0.444444	2	13	0.153846
SPAC12G12.2	efg1	3	I	346052	346113	-	1	1	25	0.04	0	13	0
SPAC12G12.2	efg1	3	I	346052	346113	-	2	0	15	0	0	9	0
SPAC12G12.2	efg1	3	I	346052	346113	-	3	0	18	0	0	20	0
SPAC12G12.07c		1	I	334783	334829	+	1	0	3	0	0	6	0
SPAC12G12.07c		1	I	334783	334829	+	3	0	2	0	1	7	0.142857
SPAC12G12.11c	miy1	2	I	327392	327497	+	2	0	5	0	0	4	0
SPAC12G12.11c	miy1	2	I	327392	327497	+	3	0	7	0	0	5	0
SPAC12G12.11c	miy1	2	I	327392	327497	+	1	1	8	0.125	0	10	0
SPAC12G12.12	gms2	1	I	325167	325224	-	2	0	3	0	0	4	0
SPAC12G12.12	gms2	1	I	325167	325224	-	1	0	2	0	0	7	0
SPAC12G12.12	gms2	2	I	324408	324461	-	1	0	7	0	1	7	0.142857
SPAC12G12.12	gms2	2	I	324408	324461	-	2	0	5	0	0	4	0
SPAC12G12.15	sif3	1	I	318173	318220	-	3	0	6	0	0	2	0
SPAC12G12.15	sif3	2	I	317470	317513	-	2	0	41	0	0	26	0
SPAC12G12.15	sif3	2	I	317470	317513	-	3	0	39	0	3	49	0.0612245
SPAC12G12.15	sif3	2	I	317470	317513	-	1	1	33	0.030303	3	23	0.130435
SPAC12G12.17		1	I	333240	333290	+	2	0	2	0	0	4	0
SPAC12G12.17		1	I	333240	333290	+	3	1	5	0.2	0	2	0
SPAC12G12.17		1	I	333240	333290	+	1	0	6	0	0	3	0
SPAC139.01c	mkt1	1	I	1018828	1018868	-	2	2	5	0.4	1	5	0.2
SPAC139.01c	mkt1	2	I	1016670	1016729	-	2	1	5	0.2	0	5	0
SPAC139.3	toe2	2	I	1023795	1023835	+	2	0	4	0	0	5	0
SPAC139.3	toe2	2	I	1023795	1023835	+	3	1	6	0.166667	0	2	0
SPAC139.6	hat1	2	I	1030442	1030502	+	1	0	2	0	0	2	0
SPAC139.6	hat1	3	I	1030722	1030810	+	3	0	15	0	1	22	0.0454545
SPAC139.6	hat1	3	I	1030722	1030810	+	1	0	24	0	1	22	0.0454545
SPAC139.6	hat1	3	I	1030722	1030810	+	2	0	13	0	1	11	0.0909091
SPAC139.6	hat1	4	I	1030927	1030997	+	1	2	27	0.0740741	0	26	0
SPAC139.6	hat1	4	I	1030927	1030997	+	2	0	17	0	0	13	0
SPAC139.6	hat1	4	I	1030927	1030997	+	3	0	18	0	1	24	0.0416667
SPAC139.6	hat1	5	I	1031362	1031417	+	1	2	56	0.0357143	0	48	0
SPAC139.6	hat1	5	I	1031362	1031417	+	3	2	47	0.0425532	1	47	0.0212766
SPAC139.6	hat1	5	I	1031362	1031417	+	2	0	45	0	0	26	0
SPAC13A11.04c	ubp8	2	I	580984	581083	-	3	0	2	0	0	2	0
SPAC13A11.04c	ubp8	3	I	580251	580295	-	3	0	3	0	0	3	0
SPAC13A11.04c	ubp8	4	I	579900	579952	-	2	2	13	0.153846	0	8	0
SPAC13A11.04c	ubp8	4	I	579900	579952	-	3	3	22	0.136364	4	14	0.285714
SPAC13A11.04c	ubp8	4	I	579900	579952	-	1	4	14	0.285714	0	16	0
SPAC13A11.04c	ubp8	5	I	579790	579834	-	1	2	29	0.0689655	5	32	0.15625
SPAC13A11.04c	ubp8	5	I	579790	579834	-	2	4	33	0.121212	0	21	0
SPAC13A11.04c	ubp8	5	I	579790	579834	-	3	1	53	0.0188679	1	40	0.025
SPAC13C5.06c	mug121	1	I	434832	434875	-	3	1	4	0.25	1	4	0.25
SPAC13C5.06c	mug121	1	I	434832	434875	-	1	1	5	0.2	0	5	0
SPAC13C5.06c	mug121	1	I	434832	434875	-	2	1	2	0.5	0	2	0
SPAC13C5.7	mre11	3	I	437581	437623	+	2	0	3	0	0	3	0
SPAC13C5.7	mre11	3	I	437581	437623	+	1	1	7	0.142857	0	4	0
SPAC13C5.7	mre11	3	I	437581	437623	+	3	0	4	0	0	5	0
SPAC13C5.7	mre11	4	I	437808	437852	+	1	0	8	0	0	4	0
SPAC13C5.7	mre11	4	I	437808	437852	+	2	0	3	0	0	5	0
SPAC13C5.7	mre11	4	I	437808	437852	+	3	0	4	0	0	5	0
SPAC13D6.03c	trm9	1	I	2250978	2251026	-	2	0	2	0	0	2	0
SPAC13D6.03c	trm9	1	I	2250978	2251026	-	1	1	6	0.166667	0	5	0
SPAC13F5.01c	msh1	2	I	2169268	2169307	-	2	2	10	0.2	2	9	0.222222
SPAC13F5.01c	msh1	2	I	2169268	2169307	-	1	7	14	0.5	1	5	0.2
SPAC13F5.01c	msh1	2	I	2169268	2169307	-	3	6	13	0.461538	4	23	0.173913
SPAC13F5.06c	sec10	4	I	2181724	2181766	-	3	1	57	0.0175439	4	45	0.0888889
SPAC13F5.06c	sec10	4	I	2181724	2181766	-	1	2	40	0.05	4	31	0.129032
SPAC13F5.06c	sec10	4	I	2181724	2181766	-	2	6	34	0.176471	2	36	0.0555556
SPAC13G6.4	tim8	1	I	180529	180585	+	1	1	8	0.125	0	3	0
SPAC13G6.4	tim8	1	I	180529	180585	+	2	0	3	0	0	8	0
SPAC13G6.4	tim8	1	I	180529	180585	+	3	0	5	0	0	8	0
SPAC13G6.4	tim8	2	I	180722	180889	+	3	1	57	0.0175439	0	60	0
SPAC13G6.4	tim8	2	I	180722	180889	+	2	0	33	0	0	43	0
SPAC13G6.4	tim8	2	I	180722	180889	+	1	2	64	0.03125	0	49	0
SPAC13G6.05c	trs33	3	I	181437	181484	-	2	2	25	0.08	2	16	0.125
SPAC13G6.05c	trs33	3	I	181437	181484	-	1	6	21	0.285714	0	15	0
SPAC13G6.05c	trs33	3	I	181437	181484	-	3	2	25	0.08	1	21	0.047619
SPAC13G6.9	trs402	1	I	190585	190729	+	1	0	3	0	1	2	0.5
SPAC13G6.11c	erg12	1	I	195259	195507	-	1	0	8	0	0	5	0
SPAC13G6.11c	erg12	1	I	195259	195507	-	3	0	4	0	0	3	0
SPAC13G7.01c	erg7	2	I	2293755	2293810	-	2	0	2	0	0	2	0
SPAC13G7.01c	erg7	3	I	2293089	2293136	-	1	3	119	0.0252101	4	89	0.0449438
SPAC13G7.01c	erg7	3	I	2293089	2293136	-	2	0	119	0	1	81	0.0123457
SPAC13G7.01c	erg7	3	I	2293089	2293136	-	3	2	123	0.0162602	2	100	0.02
SPAC13G7.3	upf3	2	I	2299300	2299349	+	3	1	14	0.0714286	2	12	0.166667
SPAC13G7.3	upf3	2	I	2299300	2299349	+	2	2	6	0.333333	1	9	0.111111
SPAC13G7.3	upf3	2	I	2299300	2299349	+	1	9	23	0.391304	0	13	0
SPAC13G7.7	arb2	4	I	2309947	2309997	+	2	1	2	0.5	0	2	0
SPAC13G7.7	arb2	4	I	2309947	2309997	+	1	2	4	0.5	1	4	0.25
SPAC13G7.7	arb2	4	I	2309947	2309997	+	3	2	4	0.5	1	2	0.5
SPAC13G7.7	arb2	5	I	2310089	2310129	+	3	1	5	0.2	1	5	0.2
SPAC13G7.7	arb2	5	I	2310089	2310129	+	1	1	7	0.142857	0	6	0
SPAC13G7.7	arb2	5	I	2310089	2310129	+	2	0	4	0	0	9	0
SPAC13G7.08c	crb3	2	I	2310518	2310560	-	1	0	4	0	0	2	0
SPAC13G7.11	mba1	1	I	2315350	2315385	+	1	2	8	0.25	1	5	0.2
SPAC13G7.11	mba1	1	I	2315350	2315385	+	3	1	8	0.125	0	4	0
SPAC13G7.11	mba1	2	I	2315600	2315700	+	2	3	14	0.214286	0	5	0
SPAC13G7.11	mba1	2	I	2315600	2315700	+	3	5	20	0.25	3	18	0.166667
SPAC13G7.11	mba1	2	I	2315600	2315700	+	1	5	13	0.384615	1	8	0.125
SPAC1420.01c		1	I	1262610	1262654	-	3	1	2	0.5	1	2	0.5
SPAC144.1		1	I	4650765	4650822	-	3	0	2	0	2	12	0.166667
SPAC144.1		1	I	4650765	4650822	-	1	2	9	0.222222	0	9	0
SPAC144.1		1	I	4650765	4650822	-	2	2	10	0.2	0	8	0
SPAC144.3	ade2	1	I	4654728	4654766	+	3	0	7	0	1	9	0.111111
SPAC144.3	ade2	1	I	4654728	4654766	+	1	1	6	0.166667	0	6	0
SPAC144.3	ade2	2	I	4654864	4655246	+	2	0	6	0	0	3	0
SPAC144.3	ade2	2	I	4654864	4655246	+	1	0	8	0	0	8	0
SPAC144.3	ade2	2	I	4654864	4655246	+	3	0	10	0	0	10	0
SPAC144.5		3	I	4662884	4662921	+	3	4	5	0.8	3	4	0.75
SPAC144.5		3	I	4662884	4662921	+	2	1	3	0.333333	0	2	0
SPAC144.5		4	I	4663122	4663163	+	3	0	8	0	1	5	0.2
SPAC144.5		4	I	4663122	4663163	+	2	1	3	0.333333	1	3	0.333333
SPAC144.5		4	I	4663122	4663163	+	1	0	5	0	1	2	0.5
SPAC144.5		5	I	4663205	4663244	+	1	1	6	0.166667	1	4	0.25
SPAC144.5		5	I	4663205	4663244	+	3	1	8	0.125	1	5	0.2
SPAC144.5		5	I	4663205	4663244	+	2	1	5	0.2	0	3	0
SPAC144.6	apl5	4	I	4666977	4667015	+	2	3	21	0.142857	3	18	0.166667
SPAC144.6	apl5	4	I	4666977	4667015	+	3	3	28	0.107143	5	21	0.238095
SPAC144.6	apl5	4	I	4666977	4667015	+	1	8	33	0.242424	0	18	0
SPAC144.09c	sfc2	1	I	4670863	4670905	-	2	0	2	0	0	2	0
SPAC144.14	klp8	1	I	4682277	4682328	+	3	1	3	0.333333	0	2	0
SPAC144.17c		2	I	4687478	4687521	-	2	1	5	0.2	0	5	0
SPAC144.17c		2	I	4687478	4687521	-	3	1	9	0.111111	0	2	0
SPAC144.17c		2	I	4687478	4687521	-	1	3	15	0.2	0	7	0
SPAC1486.1	sod2	1	I	3185578	3185700	+	3	1	15	0.0666667	0	12	0
SPAC1486.1	sod2	1	I	3185578	3185700	+	1	0	49	0	1	41	0.0243902
SPAC1486.1	sod2	1	I	3185578	3185700	+	2	1	17	0.0588235	0	16	0
SPAC1486.02c	dsc2	1	I	3187942	3188048	-	2	0	2	0	0	3	0
SPAC1486.02c	dsc2	1	I	3187942	3188048	-	3	0	2	0	0	4	0
SPAC1486.02c	dsc2	1	I	3187942	3188048	-	1	0	3	0	0	3	0
SPAC1486.02c	dsc2	2	I	3187723	3187810	-	2	0	2	0	0	4	0
SPAC1486.02c	dsc2	2	I	3187723	3187810	-	1	0	3	0	0	4	0
SPAC1486.02c	dsc2	2	I	3187723	3187810	-	3	0	2	0	0	4	0
SPAC1486.6	npt1	1	I	3203924	3204067	+	3	0	3	0	0	6	0
SPAC1486.6	npt1	1	I	3203924	3204067	+	1	0	7	0	0	3	0
SPAC1486.6	npt1	1	I	3203924	3204067	+	2	0	4	0	0	2	0
SPAC1486.8	cox16	1	I	3207751	3207869	+	1	1	14	0.0714286	0	8	0
SPAC1486.8	cox16	1	I	3207751	3207869	+	2	0	6	0	0	2	0
SPAC1486.8	cox16	1	I	3207751	3207869	+	3	0	2	0	0	6	0
SPAC1486.9	nob1	1	I	3210103	3210317	+	1	0	17	0	0	8	0
SPAC1486.9	nob1	1	I	3210103	3210317	+	2	0	6	0	0	5	0
SPAC1486.9	nob1	1	I	3210103	3210317	+	3	0	5	0	0	8	0
SPAC14C4.06c	nab2	1	I	5239193	5239235	-	1	0	3	0	0	5	0
SPAC14C4.06c	nab2	1	I	5239193	5239235	-	3	0	7	0	0	4	0
SPAC14C4.06c	nab2	1	I	5239193	5239235	-	2	0	4	0	0	5	0
SPAC14C4.06c	nab2	2	I	5239048	5239093	-	2	0	20	0	0	15	0
SPAC14C4.06c	nab2	2	I	5239048	5239093	-	3	1	30	0.0333333	3	22	0.136364
SPAC14C4.06c	nab2	2	I	5239048	5239093	-	1	1	23	0.0434783	1	23	0.0434783
SPAC14C4.15c	dpp1	1	I	5260253	5260296	-	1	0	2	0	0	3	0
SPAC1527.2	sft2	1	I	4383212	4383264	+	3	1	17	0.0588235	1	9	0.111111
SPAC1527.2	sft2	1	I	4383212	4383264	+	2	1	12	0.0833333	0	6	0
SPAC1527.2	sft2	1	I	4383212	4383264	+	1	3	9	0.333333	0	4	0
SPAC1527.2	sft2	2	I	4383594	4383749	+	2	0	12	0	0	6	0
SPAC1527.2	sft2	2	I	4383594	4383749	+	1	3	9	0.333333	0	4	0
SPAC1527.2	sft2	2	I	4383594	4383749	+	3	1	17	0.0588235	0	9	0
SPAC1556.01c	rad50	4	I	3791852	3791890	-	2	4	78	0.0512821	2	83	0.0240964
SPAC1556.01c	rad50	4	I	3791852	3791890	-	3	5	109	0.0458716	7	105	0.0666667
SPAC1556.01c	rad50	4	I	3791852	3791890	-	1	10	65	0.153846	1	29	0.0344828
SPAC1556.3	azr1	1	I	3799681	3799730	+	3	0	4	0	0	2	0
SPAC1556.3	azr1	2	I	3800136	3800183	+	1	2	12	0.166667	0	11	0
SPAC1556.3	azr1	2	I	3800136	3800183	+	2	0	4	0	0	2	0
SPAC1556.3	azr1	2	I	3800136	3800183	+	3	2	10	0.2	0	5	0
SPAC1556.04c	cdd1	2	I	3800618	3800685	-	3	0	2	0	0	2	0
SPAC1556.04c	cdd1	3	I	3800472	3800534	-	3	1	11	0.0909091	1	8	0.125
SPAC1556.04c	cdd1	3	I	3800472	3800534	-	2	0	3	0	1	3	0.333333
SPAC1556.04c	cdd1	3	I	3800472	3800534	-	1	1	6	0.166667	0	2	0
SPAC1556.04c	cdd1	4	I	3800352	3800392	-	1	1	14	0.0714286	1	6	0.166667
SPAC1556.04c	cdd1	4	I	3800352	3800392	-	3	2	17	0.117647	2	13	0.153846
SPAC1556.04c	cdd1	4	I	3800352	3800392	-	2	0	8	0	2	12	0.166667
SPAC1556.05c	cgr1	1	I	3801644	3801683	-	1	1	2	0.5	0	2	0
SPAC1556.05c	cgr1	2	I	3801590	3801633	-	2	1	7	0.142857	0	13	0
SPAC1556.05c	cgr1	2	I	3801590	3801633	-	1	2	24	0.0833333	0	20	0
SPAC1556.05c	cgr1	2	I	3801590	3801633	-	3	0	17	0	0	15	0
SPAC1556.05c	cgr1	3	I	3801392	3801441	-	3	3	20	0.15	2	17	0.117647
SPAC1556.05c	cgr1	3	I	3801392	3801441	-	2	0	9	0	1	13	0.0769231
SPAC1556.05c	cgr1	3	I	3801392	3801441	-	1	2	28	0.0714286	0	21	0
SPAC1556.7	pmm1	1	I	3805931	3806162	+	1	0	8	0	0	10	0
SPAC1556.7	pmm1	1	I	3805931	3806162	+	3	0	9	0	0	4	0
SPAC1556.7	pmm1	1	I	3805931	3806162	+	2	0	7	0	0	6	0
SPAC1556.08c	cbs2	1	I	3808572	3808634	-	2	0	2	0	0	7	0
SPAC1556.08c	cbs2	2	I	3808394	3808447	-	1	0	4	0	0	2	0
SPAC1556.08c	cbs2	2	I	3808394	3808447	-	2	0	2	0	0	7	0
SPAC1556.08c	cbs2	3	I	3807988	3808034	-	3	1	5	0.2	0	3	0
SPAC1556.08c	cbs2	3	I	3807988	3808034	-	1	0	4	0	0	7	0
SPAC1556.08c	cbs2	3	I	3807988	3808034	-	2	0	5	0	0	10	0
SPAC1556.08c	cbs2	4	I	3807776	3807830	-	3	2	6	0.333333	0	6	0
SPAC1556.08c	cbs2	4	I	3807776	3807830	-	1	0	5	0	0	8	0
SPAC1556.08c	cbs2	4	I	3807776	3807830	-	2	1	6	0.166667	0	10	0
SPAC15A10.6		2	I	3689639	3689721	+	1	0	2	0	0	2	0
SPAC15A10.6		3	I	3690442	3690483	+	1	0	3	0	0	3	0
SPAC15A10.10	mde6	4	I	3699311	3699358	+	1	0	4	0	1	7	0.142857
SPAC15A10.10	mde6	5	I	3699539	3699581	+	2	0	3	0	0	2	0
SPAC15A10.10	mde6	5	I	3699539	3699581	+	1	0	5	0	0	10	0
SPAC15A10.10	mde6	5	I	3699539	3699581	+	3	1	4	0.25	0	2	0
SPAC15A10.12c	tca17	1	I	3709347	3709498	-	3	1	3	0.333333	2	6	0.333333
SPAC15A10.12c	tca17	1	I	3709347	3709498	-	2	0	3	0	0	4	0
SPAC15A10.12c	tca17	1	I	3709347	3709498	-	1	1	7	0.142857	0	7	0
SPAC15A10.13	ppk3	5	I	3713097	3713146	+	3	0	4	0	0	4	0
SPAC15A10.13	ppk3	5	I	3713097	3713146	+	2	0	6	0	0	7	0
SPAC15A10.13	ppk3	6	I	3713320	3713378	+	1	2	12	0.166667	0	4	0
SPAC15A10.13	ppk3	6	I	3713320	3713378	+	3	1	13	0.0769231	0	11	0
SPAC15A10.13	ppk3	6	I	3713320	3713378	+	2	1	15	0.0666667	1	13	0.0769231
SPAC15E1.3	rpl42	1	I	3722809	3722998	+	3	0	151	0	0	205	0
SPAC15E1.3	rpl42	1	I	3722809	3722998	+	2	1	146	0.00684931	1	193	0.00518135
SPAC15E1.3	rpl42	1	I	3722809	3722998	+	1	1	368	0.00271739	1	302	0.00331126
SPAC15E1.05c	ect1	1	I	3727143	3727297	-	3	3	4	0.75	1	3	0.333333
SPAC15E1.05c	ect1	1	I	3727143	3727297	-	1	2	5	0.4	2	4	0.5
SPAC15E1.05c	ect1	1	I	3727143	3727297	-	2	2	5	0.4	1	4	0.25
SPAC15E1.05c	ect1	2	I	3726953	3727007	-	3	0	4	0	0	3	0
SPAC15E1.05c	ect1	2	I	3726953	3727007	-	2	0	5	0	0	4	0
SPAC15E1.05c	ect1	2	I	3726953	3727007	-	1	0	5	0	0	4	0
SPAC15E1.8	naa10	1	I	3729898	3729983	+	1	0	2	0	0	2	0
SPAC15E1.8	naa10	2	I	3730179	3730493	+	1	0	54	0	0	34	0
SPAC15E1.8	naa10	2	I	3730179	3730493	+	2	0	10	0	0	21	0
SPAC15E1.8	naa10	2	I	3730179	3730493	+	3	0	14	0	0	16	0
SPAC15E1.8	naa10	3	I	3730597	3730643	+	3	0	23	0	0	21	0
SPAC15E1.8	naa10	3	I	3730597	3730643	+	1	1	64	0.015625	1	40	0.025
SPAC15E1.8	naa10	3	I	3730597	3730643	+	2	0	15	0	0	23	0
SPAC15E1.8	naa10	4	I	3730701	3730903	+	2	2	20	0.1	1	28	0.0357143
SPAC15E1.8	naa10	4	I	3730701	3730903	+	3	0	34	0	1	39	0.025641
SPAC15E1.8	naa10	4	I	3730701	3730903	+	1	2	71	0.028169	4	48	0.0833333
SPAC15E1.9	grx2	1	I	3731425	3731671	+	3	1	3	0.333333	2	5	0.4
SPAC15E1.9	grx2	1	I	3731425	3731671	+	1	2	4	0.5	0	10	0
SPAC15E1.9	grx2	2	I	3731693	3731739	+	1	1	6	0.166667	2	13	0.153846
SPAC15E1.9	grx2	2	I	3731693	3731739	+	3	3	4	0.75	1	8	0.125
SPAC15E1.9	grx2	3	I	3731809	3731892	+	1	0	6	0	1	13	0.0769231
SPAC15E1.9	grx2	3	I	3731809	3731892	+	3	1	4	0.25	3	8	0.375
SPAC15F9.03c	nxt2	1	I	2401524	2401565	-	1	1	27	0.037037	0	12	0
SPAC15F9.03c	nxt2	1	I	2401524	2401565	-	3	0	13	0	0	25	0
SPAC15F9.03c	nxt2	1	I	2401524	2401565	-	2	0	19	0	0	22	0
SPAC15F9.03c	nxt2	2	I	2401372	2401440	-	2	0	19	0	0	22	0
SPAC15F9.03c	nxt2	2	I	2401372	2401440	-	3	0	13	0	0	25	0
SPAC15F9.03c	nxt2	2	I	2401372	2401440	-	1	1	27	0.037037	1	12	0.0833333
SPAC15F9.03c	nxt2	3	I	2401248	2401299	-	1	1	42	0.0238095	0	20	0
SPAC15F9.03c	nxt2	3	I	2401248	2401299	-	3	1	33	0.030303	0	51	0
SPAC15F9.03c	nxt2	3	I	2401248	2401299	-	2	1	27	0.037037	0	35	0
SPAC15F9.03c	nxt2	4	I	2401068	2401145	-	1	1	54	0.0185185	0	23	0
SPAC15F9.03c	nxt2	4	I	2401068	2401145	-	2	1	34	0.0294118	0	46	0
SPAC15F9.03c	nxt2	4	I	2401068	2401145	-	3	0	45	0	1	58	0.0172414
SPAC16.02c	srp2	1	I	4426879	4426922	-	1	0	3	0	0	3	0
SPAC16.02c	srp2	1	I	4426879	4426922	-	2	0	2	0	0	2	0
SPAC16.02c	srp2	1	I	4426879	4426922	-	3	0	2	0	0	4	0
SPAC16.02c	srp2	2	I	4426737	4426792	-	3	0	4	0	0	4	0
SPAC16.02c	srp2	2	I	4426737	4426792	-	2	0	2	0	0	2	0
SPAC16.02c	srp2	2	I	4426737	4426792	-	1	0	5	0	0	5	0
SPAC16.02c	srp2	3	I	4426660	4426699	-	2	0	2	0	0	3	0
SPAC16.02c	srp2	3	I	4426660	4426699	-	1	0	9	0	0	6	0
SPAC16.02c	srp2	3	I	4426660	4426699	-	3	0	4	0	0	7	0
SPAC16.02c	srp2	4	I	4426602	4426653	-	2	0	3	0	0	5	0
SPAC16.02c	srp2	4	I	4426602	4426653	-	1	2	11	0.181818	0	7	0
SPAC16.02c	srp2	4	I	4426602	4426653	-	3	0	4	0	1	8	0.125
SPAC16.02c	srp2	5	I	4426528	4426576	-	1	0	11	0	0	7	0
SPAC16.02c	srp2	5	I	4426528	4426576	-	3	0	4	0	0	8	0
SPAC16.02c	srp2	5	I	4426528	4426576	-	2	0	3	0	0	5	0
SPAC16.02c	srp2	6	I	4426269	4426458	-	1	3	13	0.230769	1	9	0.111111
SPAC16.02c	srp2	6	I	4426269	4426458	-	3	0	7	0	1	10	0.1
SPAC16.02c	srp2	6	I	4426269	4426458	-	2	0	3	0	0	6	0
SPAC16.02c	srp2	7	I	4426111	4426198	-	1	1	15	0.0666667	0	10	0
SPAC16.02c	srp2	7	I	4426111	4426198	-	3	0	13	0	0	12	0
SPAC16.02c	srp2	7	I	4426111	4426198	-	2	0	5	0	0	6	0
SPAC16.02c	srp2	8	I	4425993	4426036	-	2	1	13	0.0769231	0	9	0
SPAC16.02c	srp2	8	I	4425993	4426036	-	3	0	22	0	1	15	0.0666667
SPAC16.02c	srp2	8	I	4425993	4426036	-	1	2	17	0.117647	0	10	0
SPAC16.02c	srp2	9	I	4425838	4425892	-	1	29	412	0.0703884	1	290	0.00344828
SPAC16.02c	srp2	9	I	4425838	4425892	-	2	28	373	0.075067	1	245	0.00408163
SPAC16.02c	srp2	9	I	4425838	4425892	-	3	24	395	0.0607595	3	379	0.00791557
SPAC16.03c	ura2	1	I	4428612	4428688	-	2	1	6	0.166667	0	2	0
SPAC16.03c	ura2	1	I	4428612	4428688	-	3	1	5	0.2	0	3	0
SPAC16.03c	ura2	1	I	4428612	4428688	-	1	3	13	0.230769	0	16	0
SPAC1635.1	por1	1	I	4649004	4649079	+	1	0	8	0	0	4	0
SPAC1635.1	por1	1	I	4649004	4649079	+	3	0	5	0	0	2	0
SPAC1635.1	por1	1	I	4649004	4649079	+	2	0	5	0	0	2	0
SPAC1639.01c	elo1	1	I	252753	253589	-	3	0	16	0	0	13	0
SPAC1639.01c	elo1	1	I	252753	253589	-	1	0	29	0	0	24	0
SPAC1639.01c	elo1	1	I	252753	253589	-	2	0	12	0	0	9	0
SPAC1639.01c	elo1	2	I	252338	252391	-	3	0	23	0	0	18	0
SPAC1639.01c	elo1	2	I	252338	252391	-	1	2	55	0.0363636	0	32	0
SPAC1639.01c	elo1	2	I	252338	252391	-	2	1	22	0.0454545	0	12	0
SPAC1639.02c	trk2	10	I	256446	256541	-	2	0	17	0	0	8	0
SPAC1639.02c	trk2	10	I	256446	256541	-	3	1	19	0.0526316	0	5	0
SPAC1639.02c	trk2	10	I	256446	256541	-	1	1	17	0.0588235	0	6	0
SPAC1639.02c	trk2	11	I	256371	256426	-	1	8	20	0.4	2	7	0.285714
SPAC1639.02c	trk2	11	I	256371	256426	-	3	6	19	0.315789	1	7	0.142857
SPAC1639.02c	trk2	11	I	256371	256426	-	2	6	18	0.333333	1	8	0.125
SPAC1639.02c	trk2	12	I	256135	256344	-	2	0	19	0	2	9	0.222222
SPAC1639.02c	trk2	12	I	256135	256344	-	3	3	20	0.15	1	8	0.125
SPAC1639.02c	trk2	12	I	256135	256344	-	1	4	22	0.181818	2	8	0.25
SPAC1639.02c	trk2	4	I	257182	257228	-	3	0	5	0	0	2	0
SPAC1639.02c	trk2	4	I	257182	257228	-	2	0	4	0	0	2	0
SPAC1639.02c	trk2	5	I	257136	257178	-	2	0	5	0	1	5	0.2
SPAC1639.02c	trk2	5	I	257136	257178	-	3	2	10	0.2	1	2	0.5
SPAC1639.02c	trk2	6	I	257071	257115	-	3	1	10	0.1	0	2	0
SPAC1639.02c	trk2	6	I	257071	257115	-	2	1	5	0.2	0	5	0
SPAC1639.02c	trk2	7	I	257010	257054	-	3	3	10	0.3	0	2	0
SPAC1639.02c	trk2	7	I	257010	257054	-	1	6	11	0.545455	0	2	0
SPAC1639.02c	trk2	7	I	257010	257054	-	2	2	6	0.333333	1	6	0.166667
SPAC1639.02c	trk2	8	I	256751	256796	-	2	2	9	0.222222	1	6	0.166667
SPAC1639.02c	trk2	8	I	256751	256796	-	1	5	11	0.454545	1	3	0.333333
SPAC1639.02c	trk2	8	I	256751	256796	-	3	5	13	0.384615	0	2	0
SPAC1639.02c	trk2	9	I	256613	256683	-	3	3	14	0.214286	0	3	0
SPAC1639.02c	trk2	9	I	256613	256683	-	2	1	12	0.0833333	1	7	0.142857
SPAC1639.02c	trk2	9	I	256613	256683	-	1	4	12	0.333333	0	3	0
SPAC167.2	ptb1	1	I	1558221	1558267	-	3	0	3	0	0	3	0
SPAC167.2	ptb1	1	I	1558221	1558267	-	1	0	2	0	0	4	0
SPAC167.2	ptb1	2	I	1558015	1558069	-	1	0	2	0	0	5	0
SPAC167.2	ptb1	2	I	1558015	1558069	-	3	0	4	0	0	3	0
SPAC167.2	ptb1	2	I	1558015	1558069	-	2	2	2	1	0	4	0
SPAC167.2	ptb1	3	I	1557844	1557897	-	2	2	8	0.25	0	7	0
SPAC167.2	ptb1	3	I	1557844	1557897	-	1	0	7	0	1	9	0.111111
SPAC167.2	ptb1	3	I	1557844	1557897	-	3	2	12	0.166667	0	8	0
SPAC167.2	ptb1	4	I	1557590	1557627	-	1	1	8	0.125	0	12	0
SPAC167.2	ptb1	4	I	1557590	1557627	-	3	2	14	0.142857	0	10	0
SPAC167.2	ptb1	4	I	1557590	1557627	-	2	1	12	0.0833333	0	8	0
SPAC167.2	ptb1	5	I	1557411	1557455	-	1	0	12	0	2	17	0.117647
SPAC167.2	ptb1	5	I	1557411	1557455	-	3	1	22	0.0454545	1	16	0.0625
SPAC167.2	ptb1	5	I	1557411	1557455	-	2	1	16	0.0625	0	11	0
SPAC167.4	pam17	1	I	1554293	1554380	-	2	1	7	0.142857	0	8	0
SPAC167.4	pam17	1	I	1554293	1554380	-	1	0	13	0	1	8	0.125
SPAC167.4	pam17	1	I	1554293	1554380	-	3	1	7	0.142857	0	8	0
SPAC167.4	pam17	2	I	1554167	1554213	-	2	3	38	0.0789474	0	44	0
SPAC167.4	pam17	2	I	1554167	1554213	-	1	5	57	0.0877193	1	49	0.0204082
SPAC167.4	pam17	2	I	1554167	1554213	-	3	4	64	0.0625	2	67	0.0298507
SPAC167.4	pam17	3	I	1554073	1554134	-	2	3	42	0.0714286	1	47	0.0212766
SPAC167.4	pam17	3	I	1554073	1554134	-	3	1	66	0.0151515	1	71	0.0140845
SPAC167.4	pam17	3	I	1554073	1554134	-	1	4	59	0.0677966	2	51	0.0392157
SPAC167.07c	hul5	2	I	1549603	1549646	+	2	1	16	0.0625	0	10	0
SPAC167.07c	hul5	2	I	1549603	1549646	+	1	3	19	0.157895	0	22	0
SPAC167.07c	hul5	2	I	1549603	1549646	+	3	4	22	0.181818	1	26	0.0384615
SPAC167.9	pga1	1	I	1558958	1559006	+	2	1	14	0.0714286	0	6	0
SPAC167.9	pga1	1	I	1558958	1559006	+	1	3	16	0.1875	1	17	0.0588235
SPAC167.9	pga1	1	I	1558958	1559006	+	3	0	10	0	2	16	0.125
SPAC167.9	pga1	2	I	1559128	1559173	+	1	2	25	0.08	0	23	0
SPAC167.9	pga1	2	I	1559128	1559173	+	3	0	23	0	0	19	0
SPAC167.9	pga1	2	I	1559128	1559173	+	2	0	21	0	0	9	0
SPAC1687.1	rpc19	1	I	903173	903245	+	3	0	5	0	0	5	0
SPAC1687.1	rpc19	1	I	903173	903245	+	1	0	8	0	0	8	0
SPAC1687.1	rpc19	1	I	903173	903245	+	2	0	2	0	0	2	0
SPAC1687.1	rpc19	2	I	903344	903391	+	3	2	42	0.047619	1	25	0.04
SPAC1687.1	rpc19	2	I	903344	903391	+	1	1	28	0.0357143	2	44	0.0454545
SPAC1687.1	rpc19	2	I	903344	903391	+	2	3	26	0.115385	1	19	0.0526316
SPAC1687.1	rpc19	3	I	903469	903545	+	2	4	30	0.133333	1	23	0.0434783
SPAC1687.1	rpc19	3	I	903469	903545	+	1	3	32	0.09375	3	50	0.06
SPAC1687.1	rpc19	3	I	903469	903545	+	3	6	49	0.122449	3	31	0.0967742
SPAC1687.03c	rfc4	1	I	906145	906287	-	2	1	7	0.142857	0	2	0
SPAC1687.03c	rfc4	1	I	906145	906287	-	3	0	2	0	2	5	0.4
SPAC1687.03c	rfc4	2	I	905978	906032	-	1	4	21	0.190476	1	8	0.125
SPAC1687.03c	rfc4	2	I	905978	906032	-	2	1	15	0.0666667	0	10	0
SPAC1687.03c	rfc4	2	I	905978	906032	-	3	1	6	0.166667	1	9	0.111111
SPAC1687.11	spb1	3	I	922748	922892	+	3	0	2	0	0	2	0
SPAC1687.11	spb1	3	I	922748	922892	+	1	0	6	0	0	2	0
SPAC1687.12c	coq4	1	I	926067	926121	-	3	2	5	0.4	0	2	0
SPAC1687.12c	coq4	1	I	926067	926121	-	2	1	4	0.25	0	5	0
SPAC1687.12c	coq4	1	I	926067	926121	-	1	3	9	0.333333	0	4	0
SPAC1687.12c	coq4	2	I	925858	925961	-	2	0	11	0	0	10	0
SPAC1687.12c	coq4	2	I	925858	925961	-	3	0	14	0	0	12	0
SPAC1687.12c	coq4	2	I	925858	925961	-	1	0	25	0	0	8	0
SPAC1687.12c	coq4	3	I	925447	925502	-	2	1	22	0.0454545	0	15	0
SPAC1687.12c	coq4	3	I	925447	925502	-	3	1	32	0.03125	0	22	0
SPAC1687.12c	coq4	3	I	925447	925502	-	1	0	46	0	2	17	0.117647
SPAC1687.13c	csn5	1	I	927382	927488	-	1	1	6	0.166667	0	2	0
SPAC1687.13c	csn5	2	I	926672	926735	-	2	0	6	0	0	2	0
SPAC1687.13c	csn5	2	I	926672	926735	-	3	0	4	0	0	4	0
SPAC1687.13c	csn5	2	I	926672	926735	-	1	2	12	0.166667	0	4	0
SPAC1687.18c	ssl3	3	I	936372	936452	-	1	0	4	0	0	6	0
SPAC1687.18c	ssl3	3	I	936372	936452	-	2	0	2	0	0	5	0
SPAC1687.19c	qtr1	1	I	939576	939629	-	2	0	2	0	0	4	0
SPAC1687.19c	qtr1	1	I	939576	939629	-	1	0	2	0	0	5	0
SPAC1687.19c	qtr1	2	I	938959	939001	-	1	0	4	0	1	8	0.125
SPAC1687.19c	qtr1	2	I	938959	939001	-	2	0	3	0	0	6	0
SPAC1687.21		1	I	941990	942214	+	3	0	22	0	0	27	0
SPAC1687.21		1	I	941990	942214	+	2	0	21	0	1	28	0.0357143
SPAC1687.21		1	I	941990	942214	+	1	2	52	0.0384615	0	59	0
SPAC1687.21		2	I	942297	942450	+	2	1	21	0.047619	5	28	0.178571
SPAC1687.21		2	I	942297	942450	+	1	8	52	0.153846	1	59	0.0169492
SPAC1687.21		2	I	942297	942450	+	3	0	22	0	1	27	0.037037
SPAC1687.21		3	I	942574	942614	+	2	0	24	0	3	32	0.09375
SPAC1687.21		3	I	942574	942614	+	1	9	57	0.157895	2	66	0.030303
SPAC1687.21		3	I	942574	942614	+	3	3	32	0.09375	0	30	0
SPAC1687.21		4	I	942681	942726	+	2	1	89	0.011236	6	122	0.0491803
SPAC1687.21		4	I	942681	942726	+	3	0	94	0	1	99	0.010101
SPAC1687.21		4	I	942681	942726	+	1	9	152	0.0592105	2	143	0.013986
SPAC1687.21		5	I	942749	942804	+	1	8	170	0.0470588	0	162	0
SPAC1687.21		5	I	942749	942804	+	3	0	115	0	1	125	0.008
SPAC1687.21		5	I	942749	942804	+	2	1	108	0.00925926	1	133	0.0075188
SPAC1687.22c	puf3	2	I	943693	943740	-	3	1	7	0.142857	0	11	0
SPAC1687.22c	puf3	2	I	943693	943740	-	1	0	5	0	0	4	0
SPAC1687.22c	puf3	2	I	943693	943740	-	2	0	9	0	1	9	0.111111
SPAC16A10.2	sub1	1	I	3081105	3081154	+	1	1	6	0.166667	1	8	0.125
SPAC16A10.2	sub1	1	I	3081105	3081154	+	2	1	5	0.2	1	7	0.142857
SPAC16A10.2	sub1	1	I	3081105	3081154	+	3	3	5	0.6	0	6	0
SPAC16A10.4	rho4	4	I	3087588	3087703	+	3	0	9	0	1	4	0.25
SPAC16A10.4	rho4	4	I	3087588	3087703	+	2	0	3	0	0	5	0
SPAC16A10.4	rho4	4	I	3087588	3087703	+	1	0	18	0	0	11	0
SPAC16A10.4	rho4	5	I	3087839	3087894	+	1	0	26	0	0	12	0
SPAC16A10.4	rho4	5	I	3087839	3087894	+	2	0	5	0	0	10	0
SPAC16A10.4	rho4	5	I	3087839	3087894	+	3	0	14	0	0	10	0
SPAC16A10.06c	nse2	2	I	3090048	3090162	-	3	0	23	0	0	27	0
SPAC16A10.06c	nse2	2	I	3090048	3090162	-	2	0	19	0	0	19	0
SPAC16A10.06c	nse2	2	I	3090048	3090162	-	1	3	29	0.103448	0	21	0
SPAC16A10.08c	mug74	1	I	3094174	3094228	-	2	1	3	0.333333	1	5	0.2
SPAC16A10.08c	mug74	1	I	3094174	3094228	-	1	0	3	0	0	4	0
SPAC16A10.08c	mug74	1	I	3094174	3094228	-	3	1	5	0.2	1	4	0.25
SPAC16C9.01c		1	I	792092	792128	-	1	1	2	0.5	2	2	1
SPAC16C9.01c		2	I	791852	792013	-	1	1	2	0.5	1	2	0.5
SPAC16C9.02c	mta1	1	I	793610	793658	-	1	2	5	0.4	0	8	0
SPAC16C9.02c	mta1	1	I	793610	793658	-	2	0	3	0	0	4	0
SPAC16C9.02c	mta1	2	I	792950	793048	-	2	1	3	0.333333	0	6	0
SPAC16C9.02c	mta1	2	I	792950	793048	-	1	2	14	0.142857	0	13	0
SPAC16C9.04c	mot2	1	I	798498	798547	-	2	0	3	0	0	2	0
SPAC16C9.04c	mot2	2	I	798230	798317	-	2	0	4	0	0	3	0
SPAC16E8.3	gna1	1	I	3505210	3505310	+	2	0	8	0	0	5	0
SPAC16E8.3	gna1	1	I	3505210	3505310	+	1	0	3	0	0	8	0
SPAC16E8.3	gna1	1	I	3505210	3505310	+	3	1	8	0.125	1	4	0.25
SPAC16E8.04c	aro7	1	I	3506094	3506152	-	1	0	3	0	0	3	0
SPAC16E8.10c	rsm7	1	I	3519140	3519226	-	1	0	3	0	0	2	0
SPAC16E8.10c	rsm7	1	I	3519140	3519226	-	2	0	4	0	0	3	0
SPAC16E8.11c	tfb1	3	I	3521448	3521492	-	2	0	4	0	0	5	0
SPAC16E8.11c	tfb1	3	I	3521448	3521492	-	1	0	6	0	0	9	0
SPAC16E8.11c	tfb1	3	I	3521448	3521492	-	3	0	6	0	0	6	0
SPAC16E8.11c	tfb1	4	I	3521207	3521263	-	2	0	9	0	0	8	0
SPAC16E8.11c	tfb1	4	I	3521207	3521263	-	3	0	10	0	0	8	0
SPAC16E8.11c	tfb1	4	I	3521207	3521263	-	1	0	8	0	0	12	0
SPAC16E8.11c	tfb1	5	I	3520620	3520662	-	3	9	27	0.333333	5	20	0.25
SPAC16E8.11c	tfb1	5	I	3520620	3520662	-	1	11	22	0.5	11	23	0.478261
SPAC16E8.11c	tfb1	5	I	3520620	3520662	-	2	3	19	0.157895	7	14	0.5
SPAC16E8.12c	png3	1	I	3524163	3524204	-	1	4	5	0.8	4	5	0.8
SPAC16E8.12c	png3	2	I	3523997	3524043	-	1	2	5	0.4	1	5	0.2
SPAC16E8.12c	png3	3	I	3523645	3523924	-	1	0	5	0	0	5	0
SPAC16E8.14c	tae1	1	I	3528070	3528106	-	3	0	2	0	0	2	0
SPAC16E8.14c	tae1	2	I	3527863	3528008	-	1	0	4	0	0	2	0
SPAC16E8.14c	tae1	2	I	3527863	3528008	-	3	0	2	0	0	3	0
SPAC16E8.14c	tae1	3	I	3527494	3527594	-	2	1	32	0.03125	0	33	0
SPAC16E8.14c	tae1	3	I	3527494	3527594	-	1	2	46	0.0434783	1	27	0.037037
SPAC16E8.14c	tae1	3	I	3527494	3527594	-	3	1	52	0.0192308	0	34	0
SPAC16E8.14c	tae1	4	I	3527342	3527383	-	2	1	39	0.025641	2	37	0.0540541
SPAC16E8.14c	tae1	4	I	3527342	3527383	-	3	2	56	0.0357143	1	45	0.0222222
SPAC16E8.14c	tae1	4	I	3527342	3527383	-	1	4	52	0.0769231	1	31	0.0322581
SPAC16E8.15	tif45	1	I	3528386	3528453	+	1	0	30	0	0	42	0
SPAC16E8.15	tif45	1	I	3528386	3528453	+	2	0	19	0	0	22	0
SPAC16E8.15	tif45	1	I	3528386	3528453	+	3	0	22	0	0	28	0
SPAC16E8.15	tif45	2	I	3528629	3528762	+	2	1	46	0.0217391	0	49	0
SPAC16E8.15	tif45	2	I	3528629	3528762	+	3	1	57	0.0175439	0	65	0
SPAC16E8.15	tif45	2	I	3528629	3528762	+	1	0	64	0	0	82	0
SPAC16E8.18c	tam5	1	I	3534739	3534876	-	1	0	6	0	0	3	0
SPAC16E8.18c	tam5	1	I	3534739	3534876	-	2	0	2	0	2	3	0.666667
SPAC16E8.18c	tam5	1	I	3534739	3534876	-	3	1	5	0.2	0	3	0
SPAC1705.2		1	I	1568870	1569063	+	1	1	37	0.027027	1	29	0.0344828
SPAC1705.2		1	I	1568870	1569063	+	2	0	22	0	0	18	0
SPAC1705.2		1	I	1568870	1569063	+	3	2	26	0.0769231	0	25	0
SPAC1705.2		2	I	1569161	1569215	+	3	4	26	0.153846	1	25	0.04
SPAC1705.2		2	I	1569161	1569215	+	1	4	38	0.105263	1	30	0.0333333
SPAC1705.2		2	I	1569161	1569215	+	2	2	23	0.0869565	1	18	0.0555556
SPAC1751.02c	rsm19	1	I	386044	386106	-	2	0	4	0	0	2	0
SPAC1751.02c	rsm19	2	I	385888	385937	-	2	0	5	0	0	4	0
SPAC1751.02c	rsm19	2	I	385888	385937	-	1	1	14	0.0714286	0	8	0
SPAC1751.02c	rsm19	2	I	385888	385937	-	3	1	9	0.111111	0	7	0
SPAC1751.3	tif313	1	I	386395	386457	+	2	0	29	0	0	26	0
SPAC1751.3	tif313	1	I	386395	386457	+	1	0	59	0	0	47	0
SPAC1751.3	tif313	1	I	386395	386457	+	3	0	26	0	0	34	0
SPAC1751.3	tif313	2	I	386615	386785	+	1	0	66	0	0	56	0
SPAC1751.3	tif313	2	I	386615	386785	+	3	0	45	0	0	43	0
SPAC1751.3	tif313	2	I	386615	386785	+	2	0	38	0	0	30	0
SPAC1751.4	loc1	1	I	384350	384479	+	1	0	2	0	0	7	0
SPAC1751.4	loc1	2	I	384591	384985	+	1	0	4	0	0	8	0
SPAC1751.4	loc1	3	I	385061	385124	+	2	3	46	0.0652174	2	34	0.0588235
SPAC1751.4	loc1	3	I	385061	385124	+	3	2	67	0.0298507	0	52	0
SPAC1751.4	loc1	3	I	385061	385124	+	1	4	48	0.0833333	2	50	0.04
SPAC1782.02c		1	I	4760652	4760751	-	1	0	50	0	0	44	0
SPAC1782.02c		1	I	4760652	4760751	-	2	1	20	0.05	0	14	0
SPAC1782.02c		1	I	4760652	4760751	-	3	0	25	0	0	23	0
SPAC1782.4	cox24	1	I	4763236	4763277	+	2	0	4	0	1	7	0.142857
SPAC1782.4	cox24	1	I	4763236	4763277	+	3	2	6	0.333333	0	9	0
SPAC1782.4	cox24	1	I	4763236	4763277	+	1	1	11	0.0909091	0	5	0
SPAC1782.7	qcr8	1	I	4767142	4767330	+	2	0	11	0	0	15	0
SPAC1782.7	qcr8	1	I	4767142	4767330	+	1	0	22	0	0	29	0
SPAC1782.7	qcr8	1	I	4767142	4767330	+	3	0	10	0	0	9	0
SPAC1782.7	qcr8	2	I	4767349	4767393	+	1	19	166	0.114458	9	172	0.0523256
SPAC1782.7	qcr8	2	I	4767349	4767393	+	3	5	47	0.106383	2	69	0.0289855
SPAC1782.7	qcr8	2	I	4767349	4767393	+	2	7	50	0.14	3	66	0.0454545
SPAC1782.7	qcr8	3	I	4767608	4767710	+	3	1	57	0.0175439	1	100	0.01
SPAC1782.7	qcr8	3	I	4767608	4767710	+	1	3	203	0.0147783	6	209	0.0287081
SPAC1782.7	qcr8	3	I	4767608	4767710	+	2	1	58	0.0172414	2	94	0.0212766
SPAC1782.11	met14	1	I	4774261	4774366	+	1	2	344	0.00581395	3	286	0.0104895
SPAC1782.11	met14	1	I	4774261	4774366	+	2	4	233	0.0171674	0	199	0
SPAC1782.11	met14	1	I	4774261	4774366	+	3	5	240	0.0208333	5	235	0.0212766
SPAC1782.12c		1	I	4775068	4775163	-	1	1	9	0.111111	0	8	0
SPAC1782.12c		1	I	4775068	4775163	-	3	1	5	0.2	2	10	0.2
SPAC1782.12c		1	I	4775068	4775163	-	2	1	10	0.1	0	13	0
SPAC1782.12c		2	I	4774935	4774990	-	2	0	10	0	0	15	0
SPAC1782.12c		2	I	4774935	4774990	-	1	0	10	0	0	8	0
SPAC1782.12c		2	I	4774935	4774990	-	3	0	6	0	0	11	0
SPAC1782.12c		3	I	4773659	4773735	-	3	0	7	0	0	17	0
SPAC1782.12c		3	I	4773659	4773735	-	2	1	18	0.0555556	0	17	0
SPAC1782.12c		3	I	4773659	4773735	-	1	0	17	0	0	12	0
SPAC1783.02c	vps66	1	I	2190510	2190696	-	2	0	3	0	0	3	0
SPAC1783.02c	vps66	1	I	2190510	2190696	-	1	1	3	0.333333	0	9	0
SPAC1783.02c	vps66	2	I	2190181	2190244	-	2	0	74	0	0	48	0
SPAC1783.02c	vps66	2	I	2190181	2190244	-	3	1	95	0.0105263	1	67	0.0149254
SPAC1783.02c	vps66	2	I	2190181	2190244	-	1	1	96	0.0104167	0	70	0
SPAC1783.02c	vps66	3	I	2189846	2189906	-	2	1	92	0.0108696	0	59	0
SPAC1783.02c	vps66	3	I	2189846	2189906	-	1	5	113	0.0442478	0	78	0
SPAC1783.02c	vps66	3	I	2189846	2189906	-	3	4	114	0.0350877	3	80	0.0375
SPAC1783.04c	hst4	1	I	2193164	2193288	-	3	0	4	0	0	7	0
SPAC1783.04c	hst4	1	I	2193164	2193288	-	1	0	6	0	0	6	0
SPAC1783.06c	atg12	1	I	2199762	2199825	-	3	0	2	0	0	3	0
SPAC1783.06c	atg12	2	I	2199571	2199624	-	3	1	3	0.333333	0	4	0
SPAC17A2.03c	vma6	1	I	3556283	3556325	-	1	0	3	0	1	9	0.111111
SPAC17A2.03c	vma6	1	I	3556283	3556325	-	3	0	2	0	0	3	0
SPAC17A2.03c	vma6	1	I	3556283	3556325	-	2	0	2	0	1	4	0.25
SPAC17A2.13c	rad25	1	I	3583996	3584712	-	3	0	2	0	0	3	0
SPAC17A2.13c	rad25	1	I	3583996	3584712	-	1	0	6	0	0	3	0
SPAC17A2.13c	rad25	1	I	3583996	3584712	-	2	0	5	0	0	3	0
SPAC17A5.02c	dbr1	1	I	1755286	1755330	-	1	0	3	0	0	4	0
SPAC17A5.02c	dbr1	2	I	1755119	1755163	-	3	0	5	0	0	3	0
SPAC17A5.02c	dbr1	2	I	1755119	1755163	-	1	0	7	0	0	7	0
SPAC17A5.02c	dbr1	3	I	1754311	1754349	-	3	0	10	0	0	12	0
SPAC17A5.02c	dbr1	3	I	1754311	1754349	-	2	2	10	0.2	0	5	0
SPAC17A5.02c	dbr1	3	I	1754311	1754349	-	1	0	15	0	1	12	0.0833333
SPAC17A5.02c	dbr1	4	I	1754146	1754185	-	1	0	27	0	0	21	0
SPAC17A5.02c	dbr1	4	I	1754146	1754185	-	3	0	15	0	0	18	0
SPAC17A5.02c	dbr1	4	I	1754146	1754185	-	2	2	22	0.0909091	1	13	0.0769231
SPAC17A5.04c	mde10	1	I	1758186	1758256	-	3	1	3	0.333333	0	3	0
SPAC17A5.07c	ulp2	4	I	1765273	1765341	-	1	0	4	0	0	4	0
SPAC17A5.07c	ulp2	5	I	1765114	1765167	-	2	0	2	0	0	3	0
SPAC17A5.07c	ulp2	5	I	1765114	1765167	-	3	0	2	0	0	2	0
SPAC17A5.07c	ulp2	5	I	1765114	1765167	-	1	0	5	0	0	5	0
SPAC17A5.07c	ulp2	6	I	1764793	1764876	-	3	2	2	1	0	2	0
SPAC17A5.07c	ulp2	6	I	1764793	1764876	-	1	4	6	0.666667	0	5	0
SPAC17A5.07c	ulp2	6	I	1764793	1764876	-	2	2	2	1	0	3	0
SPAC17A5.8	erp2	1	I	1767711	1767783	+	3	1	6	0.166667	0	8	0
SPAC17A5.8	erp2	1	I	1767711	1767783	+	1	1	17	0.0588235	0	13	0
SPAC17A5.8	erp2	1	I	1767711	1767783	+	2	0	9	0	0	19	0
SPAC17A5.13	fol2	1	I	1776609	1776661	+	1	0	2	0	0	3	0
SPAC17A5.13	fol2	2	I	1776958	1777068	+	2	0	11	0	1	11	0.0909091
SPAC17A5.13	fol2	2	I	1776958	1777068	+	1	1	6	0.166667	0	6	0
SPAC17A5.13	fol2	2	I	1776958	1777068	+	3	0	6	0	0	7	0
SPAC17C9.05c	pmc3	4	I	4491383	4491431	+	3	0	2	0	0	3	0
SPAC17C9.8	pnu1	2	I	4485275	4485349	-	2	1	7	0.142857	0	6	0
SPAC17C9.8	pnu1	2	I	4485275	4485349	-	1	0	4	0	0	10	0
SPAC17C9.8	pnu1	2	I	4485275	4485349	-	3	0	3	0	0	4	0
SPAC17C9.09c	tim13	1	I	4484195	4484252	+	3	0	10	0	0	8	0
SPAC17C9.09c	tim13	1	I	4484195	4484252	+	2	0	10	0	0	12	0
SPAC17C9.09c	tim13	1	I	4484195	4484252	+	1	0	26	0	0	17	0
SPAC17C9.09c	tim13	2	I	4484322	4484364	+	3	1	32	0.03125	0	42	0
SPAC17C9.09c	tim13	2	I	4484322	4484364	+	1	0	80	0	3	66	0.0454545
SPAC17C9.09c	tim13	2	I	4484322	4484364	+	2	2	37	0.0540541	2	53	0.0377358
SPAC17C9.11c		1	I	4481013	4481157	+	2	0	3	0	0	4	0
SPAC17C9.11c		1	I	4481013	4481157	+	1	0	7	0	1	4	0.25
SPAC17C9.11c		2	I	4481735	4481892	+	2	4	17	0.235294	2	10	0.2
SPAC17C9.11c		2	I	4481735	4481892	+	3	6	12	0.5	3	9	0.333333
SPAC17C9.11c		2	I	4481735	4481892	+	1	9	24	0.375	0	9	0
SPAC17C9.12	scs22	1	I	4479493	4479721	-	1	0	2	0	0	4	0
SPAC17C9.12	scs22	1	I	4479493	4479721	-	2	0	4	0	0	4	0
SPAC17C9.12	scs22	1	I	4479493	4479721	-	3	0	3	0	0	2	0
SPAC17C9.12	scs22	2	I	4479296	4479376	-	2	0	5	0	0	5	0
SPAC17C9.12	scs22	2	I	4479296	4479376	-	3	0	5	0	0	6	0
SPAC17C9.12	scs22	2	I	4479296	4479376	-	1	0	8	0	0	4	0
SPAC17C9.14	pex19	1	I	4476475	4476616	-	3	1	8	0.125	0	4	0
SPAC17C9.14	pex19	1	I	4476475	4476616	-	1	3	7	0.428571	0	4	0
SPAC17D4.1	pex7	1	I	4723049	4723375	+	2	0	5	0	1	10	0.1
SPAC17D4.1	pex7	1	I	4723049	4723375	+	1	0	16	0	0	15	0
SPAC17D4.1	pex7	1	I	4723049	4723375	+	3	0	10	0	0	13	0
SPAC17D4.1	pex7	2	I	4723509	4723637	+	3	0	10	0	1	15	0.0666667
SPAC17D4.1	pex7	2	I	4723509	4723637	+	2	1	6	0.166667	1	12	0.0833333
SPAC17D4.1	pex7	2	I	4723509	4723637	+	1	2	17	0.117647	1	16	0.0625
SPAC17D4.2	cdc45	1	I	4726423	4726463	+	1	0	6	0	0	6	0
SPAC17G6.6	rps2401	1	I	3599172	3599240	+	3	5	2465	0.0020284	7	2336	0.00299658
SPAC17G6.6	rps2401	1	I	3599172	3599240	+	1	13	3778	0.00344097	8	2965	0.00269814
SPAC17G6.6	rps2401	1	I	3599172	3599240	+	2	7	2177	0.00321543	0	1389	0
SPAC17G6.15c	fsf1	2	I	3620481	3620528	-	2	1	2	0.5	0	2	0
SPAC17G6.15c	fsf1	2	I	3620481	3620528	-	3	0	3	0	0	3	0
SPAC17G6.15c	fsf1	3	I	3620258	3620370	-	3	0	5	0	0	5	0
SPAC17G6.15c	fsf1	3	I	3620258	3620370	-	1	0	10	0	0	3	0
SPAC17G6.15c	fsf1	3	I	3620258	3620370	-	2	0	3	0	0	4	0
SPAC17G6.15c	fsf1	4	I	3620144	3620183	-	3	0	6	0	2	7	0.285714
SPAC17G6.15c	fsf1	4	I	3620144	3620183	-	1	5	11	0.454545	2	5	0.4
SPAC17G6.15c	fsf1	4	I	3620144	3620183	-	2	1	4	0.25	0	6	0
SPAC17G6.15c	fsf1	5	I	3619704	3619807	-	1	0	11	0	0	5	0
SPAC17G6.15c	fsf1	5	I	3619704	3619807	-	3	0	7	0	0	9	0
SPAC17G6.15c	fsf1	5	I	3619704	3619807	-	2	0	6	0	0	8	0
SPAC17G6.16c	ysh1	5	I	3622061	3622104	-	3	0	7	0	0	4	0
SPAC17G6.16c	ysh1	5	I	3622061	3622104	-	1	1	9	0.111111	0	3	0
SPAC17G6.16c	ysh1	5	I	3622061	3622104	-	2	0	7	0	0	3	0
SPAC17G6.16c	ysh1	6	I	3621471	3621513	-	1	1	26	0.0384615	0	12	0
SPAC17G6.16c	ysh1	6	I	3621471	3621513	-	2	0	25	0	0	13	0
SPAC17G6.16c	ysh1	6	I	3621471	3621513	-	3	0	21	0	0	23	0
SPAC17G8.04c	arc5	1	I	2349081	2349124	-	3	0	5	0	0	5	0
SPAC17G8.04c	arc5	1	I	2349081	2349124	-	1	1	10	0.1	0	10	0
SPAC17G8.04c	arc5	1	I	2349081	2349124	-	2	0	8	0	0	5	0
SPAC17G8.04c	arc5	2	I	2348882	2349007	-	2	5	12	0.416667	0	8	0
SPAC17G8.04c	arc5	2	I	2348882	2349007	-	1	6	19	0.315789	1	13	0.0769231
SPAC17G8.04c	arc5	2	I	2348882	2349007	-	3	1	6	0.166667	0	9	0
SPAC17G8.04c	arc5	3	I	2348615	2348704	-	1	14	184	0.076087	7	143	0.048951
SPAC17G8.04c	arc5	3	I	2348615	2348704	-	3	8	180	0.0444444	1	151	0.00662252
SPAC17G8.04c	arc5	3	I	2348615	2348704	-	2	6	110	0.0545455	5	116	0.0431034
SPAC17G8.5	med20	1	I	2350341	2350382	+	2	0	3	0	1	2	0.5
SPAC17G8.5	med20	2	I	2350472	2350540	+	2	0	3	0	0	3	0
SPAC17G8.5	med20	2	I	2350472	2350540	+	3	0	2	0	0	5	0
SPAC17G8.08c	gdt2	1	I	2356155	2356425	-	1	5	27	0.185185	0	19	0
SPAC17G8.08c	gdt2	1	I	2356155	2356425	-	3	0	15	0	0	12	0
SPAC17G8.08c	gdt2	1	I	2356155	2356425	-	2	1	10	0.1	0	9	0
SPAC17G8.9	shg1	1	I	2357469	2357575	+	3	1	7	0.142857	0	4	0
SPAC17G8.9	shg1	1	I	2357469	2357575	+	2	0	3	0	0	4	0
SPAC17G8.9	shg1	1	I	2357469	2357575	+	1	0	8	0	0	3	0
SPAC17G8.9	shg1	2	I	2357698	2357762	+	2	1	4	0.25	1	5	0.2
SPAC17G8.9	shg1	2	I	2357698	2357762	+	3	3	8	0.375	0	4	0
SPAC17G8.9	shg1	2	I	2357698	2357762	+	1	2	9	0.222222	0	4	0
SPAC17G8.11c	imt3	1	I	2361932	2361980	-	3	0	9	0	0	3	0
SPAC17G8.11c	imt3	1	I	2361932	2361980	-	2	0	11	0	0	3	0
SPAC17G8.11c	imt3	1	I	2361932	2361980	-	1	0	16	0	0	9	0
SPAC17G8.13c	mst2	1	I	2366265	2366380	-	1	0	4	0	0	6	0
SPAC17G8.13c	mst2	1	I	2366265	2366380	-	3	0	4	0	0	2	0
SPAC17G8.13c	mst2	2	I	2366128	2366174	-	3	2	7	0.285714	1	6	0.166667
SPAC17G8.13c	mst2	2	I	2366128	2366174	-	2	1	7	0.142857	0	2	0
SPAC17G8.13c	mst2	2	I	2366128	2366174	-	1	1	10	0.1	0	10	0
SPAC17G8.14c	pck1	2	I	2367956	2367999	-	1	0	8	0	0	5	0
SPAC17G8.14c	pck1	2	I	2367956	2367999	-	3	0	3	0	0	8	0
SPAC17G8.14c	pck1	2	I	2367956	2367999	-	2	0	4	0	0	9	0
SPAC17G8.14c	pck1	3	I	2367726	2367766	-	1	3	19	0.157895	1	13	0.0769231
SPAC17G8.14c	pck1	3	I	2367726	2367766	-	3	1	21	0.047619	2	25	0.08
SPAC17G8.14c	pck1	3	I	2367726	2367766	-	2	2	15	0.133333	2	21	0.0952381
SPAC17G8.14c	pck1	4	I	2367497	2367541	-	3	1	26	0.0384615	1	29	0.0344828
SPAC17G8.14c	pck1	4	I	2367497	2367541	-	2	3	20	0.15	2	25	0.08
SPAC17G8.14c	pck1	4	I	2367497	2367541	-	1	0	22	0	0	14	0
SPAC17G8.15	wip1	1	I	2348089	2348208	+	2	0	2	0	0	2	0
SPAC17G8.15	wip1	2	I	2348323	2348424	+	2	0	3	0	1	3	0.333333
SPAC17H9.06c		2	I	2014552	2014598	-	3	2	2	1	1	4	0.25
SPAC17H9.06c		3	I	2014287	2014326	-	2	5	9	0.555556	0	5	0
SPAC17H9.06c		3	I	2014287	2014326	-	3	1	5	0.2	1	4	0.25
SPAC17H9.7	srp21	1	I	2016457	2016508	+	1	1	20	0.05	0	14	0
SPAC17H9.7	srp21	1	I	2016457	2016508	+	3	0	9	0	0	12	0
SPAC17H9.7	srp21	1	I	2016457	2016508	+	2	1	9	0.111111	0	11	0
SPAC17H9.7	srp21	2	I	2016699	2016840	+	1	1	51	0.0196078	0	22	0
SPAC17H9.7	srp21	2	I	2016699	2016840	+	3	0	29	0	0	32	0
SPAC17H9.7	srp21	2	I	2016699	2016840	+	2	0	22	0	0	18	0
SPAC17H9.7	srp21	3	I	2017260	2017319	+	2	2	45	0.0444444	1	26	0.0384615
SPAC17H9.7	srp21	3	I	2017260	2017319	+	1	5	66	0.0757576	2	40	0.05
SPAC17H9.7	srp21	3	I	2017260	2017319	+	3	2	47	0.0425532	1	43	0.0232558
SPAC17H9.09c	ras1	1	I	2020412	2020482	-	3	0	14	0	0	15	0
SPAC17H9.09c	ras1	1	I	2020412	2020482	-	1	0	14	0	0	16	0
SPAC17H9.09c	ras1	1	I	2020412	2020482	-	2	0	15	0	0	12	0
SPAC17H9.13c	pro2	1	I	2028574	2028697	-	2	0	5	0	0	5	0
SPAC17H9.13c	pro2	1	I	2028574	2028697	-	1	0	6	0	0	5	0
SPAC17H9.13c	pro2	2	I	2028199	2028274	-	1	0	11	0	0	8	0
SPAC17H9.13c	pro2	2	I	2028199	2028274	-	3	1	9	0.111111	0	3	0
SPAC17H9.13c	pro2	2	I	2028199	2028274	-	2	0	6	0	0	5	0
SPAC17H9.16	tom22	1	I	2031606	2031666	+	2	5	88	0.0568182	1	66	0.0151515
SPAC17H9.16	tom22	1	I	2031606	2031666	+	1	6	101	0.0594059	2	88	0.0227273
SPAC17H9.16	tom22	1	I	2031606	2031666	+	3	4	83	0.0481928	0	92	0
SPAC17H9.17c	mdm10	2	I	2032630	2032687	-	1	2	7	0.285714	0	2	0
SPAC17H9.20	psc3	5	I	2039068	2039115	+	1	1	4	0.25	1	4	0.25
SPAC1805.5	cki3	1	I	2781551	2781616	+	3	0	7	0	0	8	0
SPAC1805.5	cki3	1	I	2781551	2781616	+	1	1	16	0.0625	0	11	0
SPAC1805.5	cki3	1	I	2781551	2781616	+	2	0	9	0	0	7	0
SPAC1805.5	cki3	2	I	2781687	2781746	+	1	0	18	0	1	12	0.0833333
SPAC1805.5	cki3	2	I	2781687	2781746	+	2	0	11	0	0	7	0
SPAC1805.5	cki3	2	I	2781687	2781746	+	3	2	9	0.222222	0	8	0
SPAC1805.5	cki3	3	I	2781896	2781968	+	1	3	20	0.15	0	12	0
SPAC1805.5	cki3	3	I	2781896	2781968	+	2	1	12	0.0833333	0	8	0
SPAC1805.5	cki3	3	I	2781896	2781968	+	3	3	10	0.3	1	10	0.1
SPAC1805.07c	dad2	1	I	2785685	2786012	-	1	0	2	0	0	2	0
SPAC1805.8	dlc1	1	I	2788079	2788127	+	2	0	3	0	0	5	0
SPAC1805.8	dlc1	1	I	2788079	2788127	+	3	0	6	0	0	3	0
SPAC1805.8	dlc1	1	I	2788079	2788127	+	1	1	9	0.111111	0	2	0
SPAC1805.8	dlc1	2	I	2788239	2788298	+	1	0	9	0	0	2	0
SPAC1805.8	dlc1	2	I	2788239	2788298	+	2	0	4	0	0	5	0
SPAC1805.8	dlc1	2	I	2788239	2788298	+	3	0	6	0	0	3	0
SPAC1805.11c	rps2602	1	I	2793253	2793352	-	3	5	475	0.0105263	1	328	0.00304878
SPAC1805.11c	rps2602	1	I	2793253	2793352	-	2	3	300	0.01	1	248	0.00403226
SPAC1805.11c	rps2602	1	I	2793253	2793352	-	1	9	362	0.0248619	4	236	0.0169492
SPAC1805.13	rpl14	1	I	2795046	2795289	+	1	2	1031	0.00193986	4	759	0.00527009
SPAC1805.13	rpl14	1	I	2795046	2795289	+	2	4	919	0.00435256	2	817	0.00244798
SPAC1805.13	rpl14	1	I	2795046	2795289	+	3	2	1134	0.00176367	1	884	0.00113122
SPAC1834.06c	pmo25	1	I	4705763	4705817	-	1	0	4	0	0	7	0
SPAC1834.06c	pmo25	2	I	4705225	4705309	-	2	0	17	0	0	11	0
SPAC1834.06c	pmo25	2	I	4705225	4705309	-	1	0	30	0	0	29	0
SPAC1834.06c	pmo25	2	I	4705225	4705309	-	3	0	10	0	1	19	0.0526316
SPAC1834.10c		1	I	4718028	4718088	-	1	5	16	0.3125	0	6	0
SPAC1834.10c		1	I	4718028	4718088	-	3	1	4	0.25	2	11	0.181818
SPAC1851.2	slc1	1	I	4500960	4501022	+	1	0	11	0	0	16	0
SPAC1851.2	slc1	1	I	4500960	4501022	+	2	0	7	0	0	19	0
SPAC1851.2	slc1	1	I	4500960	4501022	+	3	1	13	0.0769231	1	9	0.111111
SPAC1851.3	ckb1	2	I	4502790	4502994	+	1	0	2	0	0	2	0
SPAC1851.3	ckb1	3	I	4504192	4504252	+	2	0	25	0	0	22	0
SPAC1851.3	ckb1	3	I	4504192	4504252	+	3	0	37	0	0	35	0
SPAC1851.3	ckb1	3	I	4504192	4504252	+	1	2	34	0.0588235	0	26	0
SPAC18B11.4	ncs1	1	I	311332	311370	-	1	1	6	0.166667	0	2	0
SPAC18B11.4	ncs1	2	I	311181	311298	-	3	1	6	0.166667	0	2	0
SPAC18B11.4	ncs1	2	I	311181	311298	-	1	0	7	0	0	2	0
SPAC18B11.4	ncs1	2	I	311181	311298	-	2	0	3	0	1	3	0.333333
SPAC18B11.4	ncs1	3	I	310791	310836	-	3	1	20	0.05	2	18	0.111111
SPAC18B11.4	ncs1	3	I	310791	310836	-	1	3	22	0.136364	0	19	0
SPAC18B11.4	ncs1	3	I	310791	310836	-	2	2	18	0.111111	1	21	0.047619
SPAC18B11.5	gpi18	1	I	309840	309888	-	1	0	4	0	0	4	0
SPAC18B11.5	gpi18	1	I	309840	309888	-	3	0	3	0	0	4	0
SPAC18B11.5	gpi18	2	I	309720	309750	-	3	2	3	0.666667	3	4	0.75
SPAC18B11.5	gpi18	2	I	309720	309750	-	1	3	4	0.75	2	4	0.5
SPAC18B11.07c	rhp6	1	I	305765	305811	+	2	1	12	0.0833333	0	11	0
SPAC18B11.07c	rhp6	1	I	305765	305811	+	3	0	6	0	0	11	0
SPAC18B11.07c	rhp6	1	I	305765	305811	+	1	0	22	0	0	27	0
SPAC18B11.07c	rhp6	2	I	305877	306089	+	2	0	16	0	0	13	0
SPAC18B11.07c	rhp6	2	I	305877	306089	+	1	0	27	0	1	33	0.030303
SPAC18B11.07c	rhp6	2	I	305877	306089	+	3	0	9	0	0	13	0
SPAC18B11.07c	rhp6	3	I	306211	306315	+	1	3	51	0.0588235	3	56	0.0535714
SPAC18B11.07c	rhp6	3	I	306211	306315	+	2	6	35	0.171429	3	33	0.0909091
SPAC18B11.07c	rhp6	3	I	306211	306315	+	3	1	28	0.0357143	2	35	0.0571429
SPAC18B11.07c	rhp6	4	I	306420	306467	+	2	5	38	0.131579	1	37	0.027027
SPAC18B11.07c	rhp6	4	I	306420	306467	+	3	4	34	0.117647	6	38	0.157895
SPAC18B11.07c	rhp6	4	I	306420	306467	+	1	7	60	0.116667	2	59	0.0338983
SPAC18B11.08c		1	I	304536	304673	+	2	0	10	0	0	10	0
SPAC18B11.08c		1	I	304536	304673	+	1	0	31	0	0	27	0
SPAC18B11.08c		1	I	304536	304673	+	3	0	14	0	0	19	0
SPAC18B11.08c		2	I	304732	304770	+	1	2	34	0.0588235	2	34	0.0588235
SPAC18B11.08c		2	I	304732	304770	+	3	2	24	0.0833333	1	22	0.0454545
SPAC18B11.08c		2	I	304732	304770	+	2	0	18	0	1	13	0.0769231
SPAC18B11.08c		3	I	304861	304918	+	2	2	24	0.0833333	0	18	0
SPAC18B11.08c		3	I	304861	304918	+	3	3	28	0.107143	1	32	0.03125
SPAC18B11.08c		3	I	304861	304918	+	1	1	47	0.0212766	0	38	0
SPAC18B11.08c		4	I	304956	304999	+	1	1	47	0.0212766	1	39	0.025641
SPAC18B11.08c		4	I	304956	304999	+	3	3	31	0.0967742	2	36	0.0555556
SPAC18B11.08c		4	I	304956	304999	+	2	1	26	0.0384615	0	20	0
SPAC18B11.09c		2	I	303641	303715	+	1	0	3	0	0	4	0
SPAC18B11.09c		3	I	303794	303851	+	1	2	10	0.2	2	9	0.222222
SPAC18B11.09c		3	I	303794	303851	+	2	3	6	0.5	2	8	0.25
SPAC18B11.09c		3	I	303794	303851	+	3	1	8	0.125	2	16	0.125
SPAC18B11.10	tup11	2	I	301264	301435	-	1	0	10	0	0	2	0
SPAC18G6.3	ypt3	1	I	2215736	2215791	+	2	0	4	0	0	10	0
SPAC18G6.3	ypt3	1	I	2215736	2215791	+	1	0	4	0	0	4	0
SPAC18G6.3	ypt3	1	I	2215736	2215791	+	3	0	6	0	0	3	0
SPAC18G6.3	ypt3	2	I	2216242	2216485	+	2	0	4	0	0	10	0
SPAC18G6.3	ypt3	2	I	2216242	2216485	+	3	0	6	0	0	3	0
SPAC18G6.3	ypt3	2	I	2216242	2216485	+	1	0	4	0	0	4	0
SPAC18G6.3	ypt3	3	I	2216567	2216620	+	1	5	250	0.02	0	219	0
SPAC18G6.3	ypt3	3	I	2216567	2216620	+	2	3	351	0.00854701	0	342	0
SPAC18G6.3	ypt3	3	I	2216567	2216620	+	3	2	448	0.00446429	3	437	0.00686499
SPAC18G6.04c	shm2	1	I	2218570	2218715	-	1	0	4	0	0	2	0
SPAC1952.2	tma23	2	I	4970180	4970243	+	2	0	2	0	1	2	0.5
SPAC1952.2	tma23	2	I	4970180	4970243	+	3	1	2	0.5	0	5	0
SPAC1952.2	tma23	2	I	4970180	4970243	+	1	0	8	0	0	3	0
SPAC1952.04c		1	I	4973031	4973243	-	3	2	6	0.333333	1	4	0.25
SPAC1952.04c		1	I	4973031	4973243	-	2	1	3	0.333333	1	2	0.5
SPAC1952.04c		2	I	4972923	4973016	-	3	3	6	0.5	1	6	0.166667
SPAC1952.04c		2	I	4972923	4973016	-	2	1	3	0.333333	1	3	0.333333
SPAC1952.04c		3	I	4972663	4972851	-	2	1	4	0.25	1	3	0.333333
SPAC1952.04c		3	I	4972663	4972851	-	3	2	7	0.285714	0	6	0
SPAC1952.7	rad1	1	I	4978755	4978880	+	1	0	2	0	0	3	0
SPAC1952.7	rad1	1	I	4978755	4978880	+	3	0	3	0	0	2	0
SPAC1952.7	rad1	2	I	4979122	4979164	+	3	0	5	0	0	3	0
SPAC1952.7	rad1	2	I	4979122	4979164	+	1	0	3	0	0	5	0
SPAC1952.7	rad1	2	I	4979122	4979164	+	2	0	2	0	2	5	0.4
SPAC1952.08c		1	I	4980487	4980561	-	1	1	13	0.0769231	0	7	0
SPAC1952.08c		1	I	4980487	4980561	-	2	0	8	0	0	10	0
SPAC1952.08c		1	I	4980487	4980561	-	3	0	8	0	0	5	0
SPAC1952.14c	mrpl25	1	I	4993935	4994045	-	3	0	8	0	0	7	0
SPAC1952.14c	mrpl25	1	I	4993935	4994045	-	1	1	15	0.0666667	1	12	0.0833333
SPAC1952.14c	mrpl25	1	I	4993935	4994045	-	2	0	8	0	0	5	0
SPAC1952.16	rga9	7	I	4999234	4999273	+	3	0	11	0	0	3	0
SPAC1952.16	rga9	7	I	4999234	4999273	+	2	0	8	0	0	3	0
SPAC1952.16	rga9	7	I	4999234	4999273	+	1	0	10	0	0	5	0
SPAC1952.16	rga9	8	I	4999673	4999707	+	2	0	11	0	0	3	0
SPAC1952.16	rga9	8	I	4999673	4999707	+	1	0	11	0	0	6	0
SPAC1952.16	rga9	8	I	4999673	4999707	+	3	1	15	0.0666667	1	4	0.25
SPAC1952.17c	tbc13	1	I	5000892	5000932	-	1	1	2	0.5	1	3	0.333333
SPAC1952.17c	tbc13	2	I	5000273	5000324	-	2	1	11	0.0909091	0	3	0
SPAC1952.17c	tbc13	2	I	5000273	5000324	-	3	1	3	0.333333	0	2	0
SPAC1952.17c	tbc13	2	I	5000273	5000324	-	1	3	9	0.333333	1	6	0.166667
SPAC19A8.4	erg5	1	I	2481646	2481977	-	3	0	20	0	0	16	0
SPAC19A8.4	erg5	1	I	2481646	2481977	-	1	0	28	0	0	24	0
SPAC19A8.4	erg5	1	I	2481646	2481977	-	2	0	28	0	0	15	0
SPAC19A8.9	yos1	2	I	2468145	2468194	-	1	0	2	0	0	3	0
SPAC19A8.9	yos1	3	I	2468001	2468042	-	3	1	3	0.333333	0	2	0
SPAC19A8.9	yos1	3	I	2468001	2468042	-	2	2	5	0.4	0	2	0
SPAC19A8.9	yos1	3	I	2468001	2468042	-	1	0	5	0	0	6	0
SPAC19A8.11c	irc6	1	I	2465406	2465445	+	3	0	2	0	0	2	0
SPAC19A8.11c	irc6	2	I	2465836	2465877	+	3	0	7	0	1	8	0.125
SPAC19A8.11c	irc6	2	I	2465836	2465877	+	2	1	8	0.125	0	10	0
SPAC19A8.11c	irc6	3	I	2466070	2466112	+	3	2	24	0.0833333	3	23	0.130435
SPAC19A8.11c	irc6	3	I	2466070	2466112	+	1	0	9	0	1	21	0.047619
SPAC19A8.11c	irc6	3	I	2466070	2466112	+	2	2	18	0.111111	1	28	0.0357143
SPAC19B12.4	rps3001	1	I	4890374	4890425	+	1	2	617	0.00324149	0	463	0
SPAC19B12.4	rps3001	1	I	4890374	4890425	+	2	1	586	0.00170648	1	384	0.00260417
SPAC19B12.4	rps3001	1	I	4890374	4890425	+	3	4	725	0.00551724	5	721	0.00693481
SPAC19B12.05c	fcp1	1	I	4893185	4893239	-	1	3	3	1	1	2	0.5
SPAC19B12.05c	fcp1	2	I	4893051	4893097	-	1	0	3	0	0	2	0
SPAC19B12.05c	fcp1	3	I	4892893	4892965	-	1	0	4	0	0	2	0
SPAC19B12.05c	fcp1	4	I	4891670	4891713	-	3	0	2	0	0	2	0
SPAC19B12.05c	fcp1	4	I	4891670	4891713	-	1	0	4	0	0	2	0
SPAC19B12.05c	fcp1	5	I	4891293	4891364	-	1	3	90	0.0333333	1	36	0.0277778
SPAC19B12.05c	fcp1	5	I	4891293	4891364	-	2	1	79	0.0126582	1	49	0.0204082
SPAC19B12.05c	fcp1	5	I	4891293	4891364	-	3	2	77	0.025974	1	56	0.0178571
SPAC19B12.06c	rbd4	1	I	4894837	4894886	-	1	3	16	0.1875	0	10	0
SPAC19B12.06c	rbd4	1	I	4894837	4894886	-	3	0	6	0	0	9	0
SPAC19B12.06c	rbd4	1	I	4894837	4894886	-	2	0	8	0	0	7	0
SPAC19B12.06c	rbd4	2	I	4894515	4894619	-	1	1	19	0.0526316	0	10	0
SPAC19B12.06c	rbd4	2	I	4894515	4894619	-	3	0	8	0	0	9	0
SPAC19B12.06c	rbd4	2	I	4894515	4894619	-	2	0	10	0	0	8	0
SPAC19B12.06c	rbd4	3	I	4894406	4894448	-	1	3	136	0.0220588	3	143	0.020979
SPAC19B12.06c	rbd4	3	I	4894406	4894448	-	2	1	73	0.0136986	3	90	0.0333333
SPAC19B12.06c	rbd4	3	I	4894406	4894448	-	3	5	74	0.0675676	0	117	0
SPAC19B12.07c		1	I	4896341	4896409	-	3	0	3	0	0	7	0
SPAC19B12.07c		1	I	4896341	4896409	-	1	1	9	0.111111	1	5	0.2
SPAC19B12.07c		2	I	4896085	4896124	-	2	0	5	0	0	4	0
SPAC19B12.07c		2	I	4896085	4896124	-	3	2	8	0.25	0	13	0
SPAC19B12.07c		2	I	4896085	4896124	-	1	3	20	0.15	0	13	0
SPAC19B12.9	srp14	1	I	4900586	4900633	+	3	0	5	0	0	12	0
SPAC19B12.9	srp14	1	I	4900586	4900633	+	1	0	13	0	0	11	0
SPAC19B12.9	srp14	1	I	4900586	4900633	+	2	0	8	0	0	6	0
SPAC19B12.9	srp14	2	I	4900713	4900756	+	2	1	8	0.125	0	6	0
SPAC19B12.9	srp14	2	I	4900713	4900756	+	3	2	7	0.285714	0	14	0
SPAC19B12.9	srp14	2	I	4900713	4900756	+	1	2	14	0.142857	1	12	0.0833333
SPAC19B12.10	sst2	3	I	4903002	4903045	+	3	1	3	0.333333	0	2	0
SPAC19B12.10	sst2	4	I	4903547	4903626	+	2	0	2	0	0	6	0
SPAC19B12.10	sst2	4	I	4903547	4903626	+	1	0	8	0	0	5	0
SPAC19B12.10	sst2	4	I	4903547	4903626	+	3	0	8	0	0	11	0
SPAC19B12.11c	bud20	1	I	4904041	4904099	-	1	1	11	0.0909091	0	11	0
SPAC19B12.11c	bud20	1	I	4904041	4904099	-	3	1	3	0.333333	0	3	0
SPAC19B12.11c	bud20	1	I	4904041	4904099	-	2	1	6	0.166667	1	3	0.333333
SPAC19D5.05c	imp3	1	I	5219471	5219516	-	2	1	7	0.142857	0	7	0
SPAC19D5.05c	imp3	1	I	5219471	5219516	-	1	1	12	0.0833333	0	17	0
SPAC19D5.05c	imp3	1	I	5219471	5219516	-	3	1	9	0.111111	2	15	0.133333
SPAC19D5.05c	imp3	2	I	5218923	5218961	-	1	1	15	0.0666667	1	20	0.05
SPAC19D5.05c	imp3	2	I	5218923	5218961	-	3	2	11	0.181818	2	16	0.125
SPAC19D5.05c	imp3	2	I	5218923	5218961	-	2	0	9	0	0	9	0
SPAC19E9.01c	nup40	1	I	1353237	1353423	-	2	0	2	0	0	2	0
SPAC19E9.01c	nup40	1	I	1353237	1353423	-	3	0	4	0	0	2	0
SPAC19G12.01c	cut20	3	I	4043658	4043748	-	1	0	2	0	0	2	0
SPAC19G12.01c	cut20	4	I	4043555	4043599	-	1	2	2	1	0	2	0
SPAC19G12.07c	rsd1	3	I	4054801	4054847	-	3	0	10	0	0	3	0
SPAC19G12.07c	rsd1	3	I	4054801	4054847	-	1	0	2	0	0	2	0
SPAC19G12.07c	rsd1	3	I	4054801	4054847	-	2	0	5	0	0	4	0
SPAC19G12.07c	rsd1	4	I	4054555	4054626	-	3	0	12	0	0	4	0
SPAC19G12.07c	rsd1	4	I	4054555	4054626	-	1	0	4	0	0	2	0
SPAC19G12.07c	rsd1	4	I	4054555	4054626	-	2	0	8	0	0	4	0
SPAC19G12.07c	rsd1	5	I	4054185	4054233	-	2	0	8	0	1	6	0.166667
SPAC19G12.07c	rsd1	5	I	4054185	4054233	-	3	2	16	0.125	0	7	0
SPAC19G12.07c	rsd1	5	I	4054185	4054233	-	1	0	4	0	0	5	0
SPAC19G12.07c	rsd1	6	I	4054069	4054109	-	2	0	9	0	2	6	0.333333
SPAC19G12.07c	rsd1	6	I	4054069	4054109	-	3	0	16	0	1	7	0.142857
SPAC19G12.07c	rsd1	6	I	4054069	4054109	-	1	0	6	0	0	5	0
SPAC19G12.13c	poz1	1	I	4070614	4070650	-	2	0	4	0	0	2	0
SPAC19G12.13c	poz1	1	I	4070614	4070650	-	1	0	4	0	0	4	0
SPAC19G12.13c	poz1	1	I	4070614	4070650	-	3	0	2	0	0	6	0
SPAC19G12.13c	poz1	2	I	4070173	4070266	-	2	0	8	0	1	10	0.1
SPAC19G12.13c	poz1	2	I	4070173	4070266	-	3	0	10	0	0	11	0
SPAC19G12.13c	poz1	2	I	4070173	4070266	-	1	1	11	0.0909091	0	8	0
SPAC19G12.14	its3	2	I	4074292	4074387	+	1	7	38	0.184211	1	17	0.0588235
SPAC19G12.14	its3	2	I	4074292	4074387	+	2	0	36	0	2	17	0.117647
SPAC19G12.14	its3	2	I	4074292	4074387	+	3	2	41	0.0487805	4	25	0.16
SPAC19G12.17	erh1	2	I	4066786	4066836	-	3	0	2	0	0	2	0
SPAC19G12.17	erh1	3	I	4066653	4066727	-	3	0	2	0	0	2	0
SPAC19G12.17	erh1	4	I	4066492	4066622	-	1	3	14	0.214286	0	11	0
SPAC19G12.17	erh1	4	I	4066492	4066622	-	3	7	20	0.35	2	8	0.25
SPAC19G12.17	erh1	4	I	4066492	4066622	-	2	5	14	0.357143	0	6	0
SPAC19G12.17	erh1	5	I	4066329	4066386	-	1	1	15	0.0666667	0	13	0
SPAC19G12.17	erh1	5	I	4066329	4066386	-	3	5	23	0.217391	1	8	0.125
SPAC19G12.17	erh1	5	I	4066329	4066386	-	2	3	16	0.1875	0	7	0
SPAC1A6.01c		1	I	1067719	1067772	-	3	1	5	0.2	0	2	0
SPAC1A6.01c		1	I	1067719	1067772	-	2	0	3	0	0	5	0
SPAC1A6.01c		1	I	1067719	1067772	-	1	1	7	0.142857	0	6	0
SPAC1A6.09c	lag1	1	I	1089045	1089306	-	3	1	14	0.0714286	1	5	0.2
SPAC1A6.09c	lag1	1	I	1089045	1089306	-	1	0	11	0	0	7	0
SPAC1A6.09c	lag1	1	I	1089045	1089306	-	2	0	8	0	0	5	0
SPAC1B1.04c	pan3	4	I	3545862	3545918	-	3	0	3	0	0	2	0
SPAC1B1.04c	pan3	4	I	3545862	3545918	-	2	0	5	0	0	5	0
SPAC1B1.04c	pan3	4	I	3545862	3545918	-	1	0	7	0	0	3	0
SPAC1B1.04c	pan3	5	I	3545251	3545314	-	3	0	3	0	0	2	0
SPAC1B1.04c	pan3	5	I	3545251	3545314	-	1	1	10	0.1	0	3	0
SPAC1B1.04c	pan3	5	I	3545251	3545314	-	2	0	6	0	0	7	0
SPAC1B1.04c	pan3	6	I	3544921	3544970	-	3	10	84	0.119048	6	43	0.139535
SPAC1B1.04c	pan3	6	I	3544921	3544970	-	1	10	78	0.128205	6	29	0.206897
SPAC1B1.04c	pan3	6	I	3544921	3544970	-	2	7	65	0.107692	4	39	0.102564
SPAC1B1.04c	pan3	7	I	3544802	3544848	-	2	43	74	0.581081	5	47	0.106383
SPAC1B1.04c	pan3	7	I	3544802	3544848	-	1	67	83	0.807229	10	31	0.322581
SPAC1B1.04c	pan3	7	I	3544802	3544848	-	3	63	100	0.63	6	50	0.12
SPAC1B2.4	cox6	1	I	2814517	2814927	+	1	0	11	0	1	5	0.2
SPAC1B2.5	mcm5	2	I	2818038	2818077	+	1	0	11	0	0	11	0
SPAC1B2.5	mcm5	2	I	2818038	2818077	+	3	2	10	0.2	1	13	0.0769231
SPAC1B2.5	mcm5	2	I	2818038	2818077	+	2	0	3	0	1	8	0.125
SPAC1B3.01c		1	I	4927599	4927819	-	3	0	3	0	0	4	0
SPAC1B3.01c		1	I	4927599	4927819	-	2	0	2	0	0	4	0
SPAC1B3.01c		1	I	4927599	4927819	-	1	1	14	0.0714286	0	5	0
SPAC1B3.01c		2	I	4927004	4927095	-	3	0	7	0	0	9	0
SPAC1B3.01c		2	I	4927004	4927095	-	1	2	19	0.105263	0	9	0
SPAC1B3.01c		2	I	4927004	4927095	-	2	0	7	0	0	11	0
SPAC1B3.02c		1	I	4929410	4929450	-	3	0	3	0	0	5	0
SPAC1B3.02c		1	I	4929410	4929450	-	1	0	9	0	0	6	0
SPAC1B3.02c		1	I	4929410	4929450	-	2	0	2	0	0	5	0
SPAC1B3.02c		2	I	4929320	4929362	-	1	0	9	0	0	6	0
SPAC1B3.02c		2	I	4929320	4929362	-	3	0	3	0	0	5	0
SPAC1B3.02c		2	I	4929320	4929362	-	2	0	2	0	2	5	0.4
SPAC1B3.02c		3	I	4929101	4929248	-	2	0	3	0	0	5	0
SPAC1B3.02c		3	I	4929101	4929248	-	3	0	4	0	0	5	0
SPAC1B3.02c		3	I	4929101	4929248	-	1	0	9	0	0	6	0
SPAC1B3.12c	rpb10	1	I	4950883	4951198	-	2	0	55	0	0	24	0
SPAC1B3.12c	rpb10	1	I	4950883	4951198	-	1	2	75	0.0266667	2	53	0.0377358
SPAC1B3.12c	rpb10	1	I	4950883	4951198	-	3	0	49	0	0	45	0
SPAC1B3.12c	rpb10	2	I	4950666	4950728	-	3	4	128	0.03125	1	107	0.00934579
SPAC1B3.12c	rpb10	2	I	4950666	4950728	-	2	1	110	0.00909091	1	61	0.0163934
SPAC1B3.12c	rpb10	2	I	4950666	4950728	-	1	3	178	0.0168539	2	119	0.0168067
SPAC1B3.14	vma3	1	I	4954651	4954695	+	3	0	3	0	0	2	0
SPAC1B3.14	vma3	1	I	4954651	4954695	+	1	0	2	0	0	2	0
SPAC1B3.14	vma3	2	I	4954702	4954747	+	2	0	2	0	0	4	0
SPAC1B3.14	vma3	2	I	4954702	4954747	+	3	0	4	0	1	3	0.333333
SPAC1B3.14	vma3	2	I	4954702	4954747	+	1	0	5	0	0	5	0
SPAC1B3.14	vma3	3	I	4954880	4955067	+	1	1	5	0.2	0	5	0
SPAC1B3.14	vma3	3	I	4954880	4955067	+	2	0	2	0	0	4	0
SPAC1B3.14	vma3	3	I	4954880	4955067	+	3	0	4	0	0	3	0
SPAC1B3.14	vma3	4	I	4955393	4955437	+	2	0	129	0	2	130	0.0153846
SPAC1B3.14	vma3	4	I	4955393	4955437	+	1	6	226	0.0265487	1	220	0.00454546
SPAC1B3.14	vma3	4	I	4955393	4955437	+	3	6	159	0.0377358	0	160	0
SPAC1B3.20		1	I	4948759	4948802	+	2	0	9	0	1	7	0.142857
SPAC1B3.20		1	I	4948759	4948802	+	3	2	15	0.133333	2	16	0.125
SPAC1B3.20		1	I	4948759	4948802	+	1	2	15	0.133333	1	12	0.0833333
SPAC1B9.02c	sck1	3	I	2402494	2402543	-	1	2	15	0.133333	0	4	0
SPAC1B9.02c	sck1	3	I	2402494	2402543	-	3	0	10	0	0	8	0
SPAC1B9.02c	sck1	3	I	2402494	2402543	-	2	0	8	0	0	6	0
SPAC1B9.03c		2	I	2406806	2406865	+	1	1	4	0.25	0	3	0
SPAC1D4.02c	grh1	1	I	641402	641447	-	2	0	2	0	0	4	0
SPAC1D4.02c	grh1	1	I	641402	641447	-	1	7	9	0.777778	1	2	0.5
SPAC1D4.02c	grh1	2	I	641185	641280	-	3	0	3	0	0	5	0
SPAC1D4.02c	grh1	2	I	641185	641280	-	1	3	12	0.25	0	3	0
SPAC1D4.02c	grh1	2	I	641185	641280	-	2	1	7	0.142857	1	5	0.2
SPAC1D4.02c	grh1	3	I	640948	640996	-	2	0	8	0	0	6	0
SPAC1D4.02c	grh1	3	I	640948	640996	-	3	0	3	0	1	6	0.166667
SPAC1D4.02c	grh1	3	I	640948	640996	-	1	1	15	0.0666667	0	3	0
SPAC1D4.06c	csk1	1	I	648830	648889	-	3	0	8	0	0	9	0
SPAC1D4.06c	csk1	1	I	648830	648889	-	1	0	8	0	0	4	0
SPAC1D4.06c	csk1	1	I	648830	648889	-	2	0	7	0	0	7	0
SPAC1D4.06c	csk1	2	I	648502	648613	-	2	2	12	0.166667	2	14	0.142857
SPAC1D4.06c	csk1	2	I	648502	648613	-	3	4	19	0.210526	1	15	0.0666667
SPAC1D4.06c	csk1	2	I	648502	648613	-	1	3	14	0.214286	0	7	0
SPAC1D4.8	pis1	1	I	650546	651192	+	1	2	10	0.2	0	11	0
SPAC1D4.8	pis1	1	I	650546	651192	+	2	2	10	0.2	0	3	0
SPAC1D4.8	pis1	1	I	650546	651192	+	3	1	6	0.166667	0	11	0
SPAC1F12.06c		1	I	3814941	3815026	-	1	1	2	0.5	1	3	0.333333
SPAC1F12.06c		1	I	3814941	3815026	-	3	1	2	0.5	0	2	0
SPAC1F12.8	cab4	1	I	3817149	3817193	+	1	0	4	0	0	4	0
SPAC1F12.8	cab4	2	I	3817804	3817850	+	1	1	4	0.25	0	4	0
SPAC1F12.8	cab4	3	I	3817992	3818034	+	1	1	39	0.025641	3	29	0.103448
SPAC1F12.8	cab4	3	I	3817992	3818034	+	2	0	24	0	0	14	0
SPAC1F12.8	cab4	3	I	3817992	3818034	+	3	0	21	0	1	19	0.0526316
SPAC1F12.8	cab4	4	I	3818131	3818169	+	1	3	43	0.0697674	1	34	0.0294118
SPAC1F12.8	cab4	4	I	3818131	3818169	+	3	0	25	0	0	24	0
SPAC1F12.8	cab4	4	I	3818131	3818169	+	2	4	28	0.142857	0	20	0
SPAC1F12.9	gpi17	1	I	3818908	3818953	+	1	0	5	0	0	2	0
SPAC1F12.9	gpi17	2	I	3819678	3819719	+	1	2	7	0.285714	0	3	0
SPAC1F12.10c		1	I	3821034	3821187	-	3	0	8	0	0	11	0
SPAC1F12.10c		1	I	3821034	3821187	-	1	1	8	0.125	0	4	0
SPAC1F12.10c		1	I	3821034	3821187	-	2	0	6	0	0	4	0
SPAC1F12.10c		2	I	3820795	3820855	-	1	2	34	0.0588235	0	25	0
SPAC1F12.10c		2	I	3820795	3820855	-	3	0	33	0	0	41	0
SPAC1F12.10c		2	I	3820795	3820855	-	2	1	33	0.030303	0	30	0
SPAC1F3.1	rrp6	1	I	611153	611210	+	2	2	3	0.666667	0	2	0
SPAC1F3.1	rrp6	1	I	611153	611210	+	1	2	4	0.5	0	5	0
SPAC1F3.04c	tsr3	1	I	621853	621988	-	2	1	3	0.333333	0	4	0
SPAC1F3.04c	tsr3	1	I	621853	621988	-	3	1	2	0.5	1	3	0.333333
SPAC1F3.07c	rsc58	1	I	632425	632498	-	2	0	6	0	0	2	0
SPAC1F3.07c	rsc58	1	I	632425	632498	-	1	0	4	0	0	4	0
SPAC1F3.9	mug161	2	I	635236	635348	+	2	0	8	0	0	7	0
SPAC1F3.9	mug161	2	I	635236	635348	+	1	1	14	0.0714286	0	6	0
SPAC1F3.9	mug161	2	I	635236	635348	+	3	0	4	0	0	5	0
SPAC1F3.9	mug161	3	I	636177	636233	+	2	12	14	0.857143	10	14	0.714286
SPAC1F3.9	mug161	3	I	636177	636233	+	1	18	22	0.818182	10	13	0.769231
SPAC1F3.9	mug161	3	I	636177	636233	+	3	16	16	1	9	10	0.9
SPAC1F3.9	mug161	4	I	636315	636384	+	2	6	19	0.315789	5	17	0.294118
SPAC1F3.9	mug161	4	I	636315	636384	+	1	10	32	0.3125	2	16	0.125
SPAC1F3.9	mug161	4	I	636315	636384	+	3	4	20	0.2	1	15	0.0666667
SPAC1F5.10	fal1	1	I	272191	272256	-	1	0	8	0	0	7	0
SPAC1F5.10	fal1	2	I	272117	272169	-	2	1	7	0.142857	0	2	0
SPAC1F5.10	fal1	2	I	272117	272169	-	3	0	8	0	0	8	0
SPAC1F5.10	fal1	2	I	272117	272169	-	1	0	11	0	0	14	0
SPAC1F7.4	rho1	1	I	4224251	4224581	+	3	0	8	0	0	7	0
SPAC1F7.4	rho1	1	I	4224251	4224581	+	1	0	6	0	0	5	0
SPAC1F7.4	rho1	1	I	4224251	4224581	+	2	0	6	0	0	5	0
SPAC1F8.07c	pdc101	1	I	101870	101871	-	1	48	48	1	30	30	1
SPAC1F8.07c	pdc101	1	I	101870	101871	-	2	35	35	1	23	23	1
SPAC1F8.07c	pdc101	1	I	101870	101871	-	3	38	38	1	33	33	1
SPAC20G4.1	caf16	1	I	4812223	4812301	+	2	0	3	0	0	3	0
SPAC20G4.1	caf16	1	I	4812223	4812301	+	1	0	4	0	0	2	0
SPAC20G4.1	caf16	2	I	4812422	4812466	+	2	1	8	0.125	0	6	0
SPAC20G4.1	caf16	2	I	4812422	4812466	+	3	1	4	0.25	1	4	0.25
SPAC20G4.1	caf16	2	I	4812422	4812466	+	1	1	8	0.125	0	2	0
SPAC20G4.04c	hus1	3	I	4822247	4822300	-	2	0	3	0	1	5	0.2
SPAC20G4.04c	hus1	3	I	4822247	4822300	-	1	1	4	0.25	1	5	0.2
SPAC20G4.04c	hus1	4	I	4821595	4821651	-	1	1	8	0.125	1	9	0.111111
SPAC20G4.04c	hus1	4	I	4821595	4821651	-	2	1	3	0.333333	1	8	0.125
SPAC20G4.06c	adf1	1	I	4826024	4826074	-	2	2	10	0.2	0	14	0
SPAC20G4.06c	adf1	1	I	4826024	4826074	-	1	2	32	0.0625	0	22	0
SPAC20G4.06c	adf1	1	I	4826024	4826074	-	3	0	17	0	0	17	0
SPAC20G4.06c	adf1	2	I	4825755	4825917	-	2	1	10	0.1	0	14	0
SPAC20G4.06c	adf1	2	I	4825755	4825917	-	1	0	32	0	0	22	0
SPAC20G4.06c	adf1	2	I	4825755	4825917	-	3	0	17	0	0	17	0
SPAC20G4.8	pdc1	1	I	4831287	4831327	+	3	0	4	0	0	6	0
SPAC20G4.8	pdc1	1	I	4831287	4831327	+	1	0	4	0	0	6	0
SPAC20G4.8	pdc1	1	I	4831287	4831327	+	2	0	8	0	0	2	0
SPAC20G4.8	pdc1	2	I	4831969	4832010	+	3	3	8	0.375	1	9	0.111111
SPAC20G4.8	pdc1	2	I	4831969	4832010	+	2	3	14	0.214286	0	4	0
SPAC20G4.8	pdc1	2	I	4831969	4832010	+	1	2	9	0.222222	2	6	0.333333
SPAC20G8.08c	fft1	2	I	1413238	1413275	-	3	0	2	0	0	4	0
SPAC20G8.08c	fft1	2	I	1413238	1413275	-	1	0	2	0	0	2	0
SPAC20G8.08c	fft1	3	I	1412793	1412835	-	1	0	3	0	0	2	0
SPAC20G8.08c	fft1	3	I	1412793	1412835	-	3	1	4	0.25	0	4	0
SPAC20G8.08c	fft1	3	I	1412793	1412835	-	2	0	4	0	0	3	0
SPAC20G8.08c	fft1	4	I	1412215	1412261	-	2	0	7	0	0	5	0
SPAC20G8.08c	fft1	4	I	1412215	1412261	-	1	0	8	0	1	7	0.142857
SPAC20G8.08c	fft1	4	I	1412215	1412261	-	3	0	8	0	0	9	0
SPAC20H4.03c	tfs1	1	I	2116256	2116312	-	1	1	43	0.0232558	1	34	0.0294118
SPAC20H4.03c	tfs1	1	I	2116256	2116312	-	3	0	10	0	1	24	0.0416667
SPAC20H4.03c	tfs1	1	I	2116256	2116312	-	2	1	17	0.0588235	0	16	0
SPAC20H4.03c	tfs1	2	I	2116018	2116192	-	3	0	10	0	2	25	0.08
SPAC20H4.03c	tfs1	2	I	2116018	2116192	-	1	2	45	0.0444444	3	36	0.0833333
SPAC20H4.03c	tfs1	2	I	2116018	2116192	-	2	1	18	0.0555556	3	19	0.157895
SPAC20H4.03c	tfs1	3	I	2115275	2115337	-	3	2	20	0.1	0	34	0
SPAC20H4.03c	tfs1	3	I	2115275	2115337	-	2	1	30	0.0333333	1	22	0.0454545
SPAC20H4.03c	tfs1	3	I	2115275	2115337	-	1	5	57	0.0877193	2	50	0.04
SPAC20H4.03c	tfs1	4	I	2115201	2115249	-	3	1	31	0.0322581	0	47	0
SPAC20H4.03c	tfs1	4	I	2115201	2115249	-	1	4	64	0.0625	3	59	0.0508475
SPAC20H4.03c	tfs1	4	I	2115201	2115249	-	2	3	39	0.0769231	1	29	0.0344828
SPAC20H4.05c	mde1	2	I	2120053	2120095	-	3	0	2	0	0	2	0
SPAC20H4.05c	mde1	3	I	2119916	2119974	-	3	0	4	0	0	2	0
SPAC20H4.05c	mde1	4	I	2119790	2119837	-	2	0	4	0	0	2	0
SPAC20H4.05c	mde1	4	I	2119790	2119837	-	1	2	6	0.333333	0	2	0
SPAC20H4.05c	mde1	4	I	2119790	2119837	-	3	5	10	0.5	0	3	0
SPAC20H4.05c	mde1	5	I	2119571	2119613	-	2	1	7	0.142857	0	4	0
SPAC20H4.05c	mde1	5	I	2119571	2119613	-	3	0	14	0	0	5	0
SPAC20H4.05c	mde1	5	I	2119571	2119613	-	1	0	9	0	0	5	0
SPAC20H4.7	rad57	1	I	2123357	2123451	+	1	0	7	0	0	3	0
SPAC20H4.9		6	I	2127653	2127700	+	2	0	17	0	0	11	0
SPAC20H4.9		6	I	2127653	2127700	+	1	2	18	0.111111	1	13	0.0769231
SPAC20H4.9		6	I	2127653	2127700	+	3	0	21	0	0	13	0
SPAC20H4.9		7	I	2127870	2127911	+	2	0	17	0	1	12	0.0833333
SPAC20H4.9		7	I	2127870	2127911	+	3	0	22	0	1	16	0.0625
SPAC20H4.9		7	I	2127870	2127911	+	1	1	18	0.0555556	1	13	0.0769231
SPAC20H4.9		8	I	2128233	2128270	+	3	8	37	0.216216	0	25	0
SPAC20H4.9		8	I	2128233	2128270	+	2	7	31	0.225806	4	23	0.173913
SPAC20H4.9		8	I	2128233	2128270	+	1	9	39	0.230769	3	24	0.125
SPAC21E11.05c	cyp8	2	I	4256153	4256217	-	1	0	11	0	0	4	0
SPAC21E11.05c	cyp8	2	I	4256153	4256217	-	3	0	5	0	0	5	0
SPAC21E11.05c	cyp8	2	I	4256153	4256217	-	2	0	5	0	0	4	0
SPAC222.03c	tim10	1	I	948133	948480	-	1	1	56	0.0178571	0	29	0
SPAC222.03c	tim10	1	I	948133	948480	-	3	0	11	0	0	23	0
SPAC222.03c	tim10	1	I	948133	948480	-	2	1	11	0.0909091	0	20	0
SPAC222.6	mak16	1	I	953175	953227	+	3	0	7	0	0	4	0
SPAC222.6	mak16	1	I	953175	953227	+	2	0	5	0	0	7	0
SPAC222.6	mak16	1	I	953175	953227	+	1	0	8	0	0	5	0
SPAC222.13c		3	I	971405	971446	-	2	3	22	0.136364	1	16	0.0625
SPAC222.13c		3	I	971405	971446	-	3	2	18	0.111111	3	21	0.142857
SPAC222.13c		3	I	971405	971446	-	1	4	31	0.129032	2	28	0.0714286
SPAC222.16c	csn3	2	I	980775	980845	-	1	0	4	0	0	5	0
SPAC222.16c	csn3	3	I	980533	980627	-	1	0	7	0	0	6	0
SPAC222.16c	csn3	3	I	980533	980627	-	3	1	3	0.333333	0	2	0
SPAC222.16c	csn3	3	I	980533	980627	-	2	0	4	0	1	2	0.5
SPAC222.16c	csn3	4	I	980379	980433	-	2	0	6	0	0	2	0
SPAC222.16c	csn3	4	I	980379	980433	-	1	1	8	0.125	0	7	0
SPAC222.16c	csn3	4	I	980379	980433	-	3	1	5	0.2	0	4	0
SPAC222.16c	csn3	5	I	980240	980288	-	2	0	8	0	0	3	0
SPAC222.16c	csn3	5	I	980240	980288	-	3	1	5	0.2	0	5	0
SPAC222.16c	csn3	5	I	980240	980288	-	1	0	8	0	0	7	0
SPAC222.16c	csn3	6	I	980027	980092	-	2	1	11	0.0909091	0	5	0
SPAC222.16c	csn3	6	I	980027	980092	-	3	3	8	0.375	1	9	0.111111
SPAC222.16c	csn3	6	I	980027	980092	-	1	2	13	0.153846	0	13	0
SPAC222.18		1	I	979022	979119	+	1	2	3	0.666667	0	2	0
SPAC222.18		2	I	979177	979214	+	2	0	3	0	1	4	0.25
SPAC222.18		2	I	979177	979214	+	1	2	10	0.2	1	10	0.1
SPAC222.18		2	I	979177	979214	+	3	2	4	0.5	1	3	0.333333
SPAC227.07c	pab1	3	I	508160	508202	-	1	0	6	0	0	6	0
SPAC227.07c	pab1	3	I	508160	508202	-	3	0	3	0	1	2	0.5
SPAC227.08c	yth1	2	I	510721	510779	-	3	0	3	0	1	2	0.5
SPAC227.08c	yth1	2	I	510721	510779	-	1	0	3	0	0	2	0
SPAC227.08c	yth1	2	I	510721	510779	-	2	0	4	0	0	2	0
SPAC227.9	fol3	1	I	511509	511661	+	2	0	15	0	0	10	0
SPAC227.9	fol3	1	I	511509	511661	+	3	0	9	0	0	15	0
SPAC227.9	fol3	1	I	511509	511661	+	1	0	44	0	0	16	0
SPAC227.10	pfd2	2	I	513999	514045	+	1	1	3	0.333333	0	3	0
SPAC227.10	pfd2	2	I	513999	514045	+	2	0	2	0	0	2	0
SPAC227.10	pfd2	2	I	513999	514045	+	3	0	3	0	0	3	0
SPAC227.10	pfd2	3	I	514170	514243	+	1	0	9	0	0	7	0
SPAC227.10	pfd2	3	I	514170	514243	+	3	0	3	0	0	4	0
SPAC227.10	pfd2	3	I	514170	514243	+	2	0	7	0	0	5	0
SPAC227.16c	psf3	1	I	528626	528672	-	2	0	2	0	0	2	0
SPAC227.16c	psf3	2	I	528461	528566	-	2	0	2	0	0	2	0
SPAC227.16c	psf3	3	I	528270	528325	-	3	1	3	0.333333	0	3	0
SPAC227.16c	psf3	3	I	528270	528325	-	2	0	3	0	0	4	0
SPAC227.16c	psf3	4	I	528065	528123	-	2	3	22	0.136364	0	10	0
SPAC227.16c	psf3	4	I	528065	528123	-	1	2	16	0.125	0	14	0
SPAC227.16c	psf3	4	I	528065	528123	-	3	2	19	0.105263	5	26	0.192308
SPAC227.19c		1	I	501249	501365	-	1	8	53	0.150943	9	50	0.18
SPAC227.19c		1	I	501249	501365	-	3	7	19	0.368421	6	41	0.146341
SPAC227.19c		1	I	501249	501365	-	2	16	37	0.432432	7	29	0.241379
SPAC22A12.08c	crd1	4	I	1170462	1170503	-	2	0	11	0	0	10	0
SPAC22A12.08c	crd1	4	I	1170462	1170503	-	1	1	15	0.0666667	0	14	0
SPAC22A12.08c	crd1	4	I	1170462	1170503	-	3	1	13	0.0769231	0	15	0
SPAC22A12.08c	crd1	5	NA	NA	NA	NA	2	2	49	0.0408163	1	53	0.0188679
SPAC22A12.08c	crd1	5	NA	NA	NA	NA	1	4	55	0.0727273	3	49	0.0612245
SPAC22A12.08c	crd1	5	NA	NA	NA	NA	3	1	65	0.0153846	1	56	0.0178571
SPAC22A12.08c	crd1	6	NA	NA	NA	NA	1	3	61	0.0491803	1	52	0.0192308
SPAC22A12.08c	crd1	6	NA	NA	NA	NA	3	1	76	0.0131579	3	62	0.0483871
SPAC22A12.08c	crd1	6	NA	NA	NA	NA	2	3	54	0.0555556	1	66	0.0151515
SPAC22A12.09c	sap114	3	I	1173208	1173292	-	2	0	6	0	0	2	0
SPAC22A12.09c	sap114	3	I	1173208	1173292	-	3	0	9	0	0	4	0
SPAC22A12.09c	sap114	3	I	1173208	1173292	-	1	0	7	0	1	9	0.111111
SPAC22A12.09c	sap114	4	I	1172790	1172832	-	3	1	14	0.0714286	0	10	0
SPAC22A12.09c	sap114	4	I	1172790	1172832	-	2	0	13	0	0	5	0
SPAC22A12.09c	sap114	4	I	1172790	1172832	-	1	1	12	0.0833333	1	13	0.0769231
SPAC22A12.10	ept1	1	I	1174708	1174757	+	1	1	9	0.111111	1	4	0.25
SPAC22A12.10	ept1	1	I	1174708	1174757	+	2	1	5	0.2	0	4	0
SPAC22A12.10	ept1	1	I	1174708	1174757	+	3	0	4	0	0	5	0
SPAC22A12.14c		2	I	1182123	1182166	-	3	0	2	0	0	3	0
SPAC22A12.14c		2	I	1182123	1182166	-	1	0	4	0	0	4	0
SPAC22A12.14c		2	I	1182123	1182166	-	2	0	4	0	0	3	0
SPAC22E12.03c	sdj1	1	I	5023176	5023273	-	1	1	20	0.05	0	27	0
SPAC22E12.03c	sdj1	1	I	5023176	5023273	-	2	0	12	0	0	10	0
SPAC22E12.03c	sdj1	1	I	5023176	5023273	-	3	0	12	0	0	23	0
SPAC22E12.4	ccs1	1	I	5024945	5024996	+	1	1	9	0.111111	1	8	0.125
SPAC22E12.4	ccs1	1	I	5024945	5024996	+	2	1	7	0.142857	0	8	0
SPAC22E12.4	ccs1	1	I	5024945	5024996	+	3	0	4	0	0	8	0
SPAC22E12.4	ccs1	2	I	5025124	5025278	+	1	1	9	0.111111	0	8	0
SPAC22E12.4	ccs1	2	I	5025124	5025278	+	3	0	4	0	0	8	0
SPAC22E12.4	ccs1	2	I	5025124	5025278	+	2	0	7	0	0	8	0
SPAC22E12.4	ccs1	3	I	5026068	5026155	+	1	18	21	0.857143	14	15	0.933333
SPAC22E12.4	ccs1	3	I	5026068	5026155	+	2	24	24	1	20	20	1
SPAC22E12.4	ccs1	3	I	5026068	5026155	+	3	25	26	0.961538	16	17	0.941176
SPAC22E12.05c	rer1	1	I	5027295	5027347	-	1	0	3	0	0	2	0
SPAC22E12.8	rrn10	1	I	5033604	5033655	+	3	0	2	0	0	2	0
SPAC22E12.8	rrn10	1	I	5033604	5033655	+	1	1	7	0.142857	0	2	0
SPAC22E12.10c	etp1	1	I	5037447	5037491	-	2	3	4	0.75	3	3	1
SPAC22E12.10c	etp1	1	I	5037447	5037491	-	3	2	2	1	3	3	1
SPAC22E12.13c	rlp24	1	I	5044618	5044667	-	1	0	30	0	0	40	0
SPAC22E12.13c	rlp24	1	I	5044618	5044667	-	2	1	19	0.0526316	0	28	0
SPAC22E12.13c	rlp24	1	I	5044618	5044667	-	3	0	18	0	0	18	0
SPAC22E12.13c	rlp24	2	I	5044232	5044478	-	1	0	30	0	0	40	0
SPAC22E12.13c	rlp24	2	I	5044232	5044478	-	3	0	18	0	0	18	0
SPAC22E12.13c	rlp24	2	I	5044232	5044478	-	2	0	19	0	0	28	0
SPAC22E12.18		1	I	5055218	5055256	+	1	0	2	0	0	3	0
SPAC22F3.03c	rdh54	14	I	706653	706687	+	2	3	3	1	2	2	1
SPAC22F3.03c	rdh54	14	I	706653	706687	+	3	0	2	0	0	3	0
SPAC22F3.07c	atp20	2	I	691804	691852	+	3	0	7	0	0	2	0
SPAC22F3.07c	atp20	2	I	691804	691852	+	2	0	3	0	1	9	0.111111
SPAC22F3.07c	atp20	2	I	691804	691852	+	1	2	5	0.4	0	5	0
SPAC22F3.11c	snu23	2	I	683110	683159	+	3	0	2	0	0	2	0
SPAC22F3.15	aim41	1	I	692726	692848	+	3	0	5	0	0	7	0
SPAC22F3.15	aim41	1	I	692726	692848	+	1	0	6	0	0	4	0
SPAC22F3.15	aim41	1	I	692726	692848	+	2	0	2	0	0	6	0
SPAC22F8.07c	rtf1	1	I	4798443	4798489	-	2	0	5	0	0	2	0
SPAC22F8.07c	rtf1	1	I	4798443	4798489	-	1	1	7	0.142857	2	5	0.4
SPAC22F8.07c	rtf1	2	I	4798231	4798275	-	3	4	6	0.666667	3	6	0.5
SPAC22F8.07c	rtf1	2	I	4798231	4798275	-	2	7	9	0.777778	0	6	0
SPAC22F8.07c	rtf1	2	I	4798231	4798275	-	1	8	9	0.888889	2	5	0.4
SPAC22F8.07c	rtf1	3	I	4798104	4798142	-	2	0	14	0	1	7	0.142857
SPAC22F8.07c	rtf1	3	I	4798104	4798142	-	1	2	16	0.125	1	9	0.111111
SPAC22F8.07c	rtf1	3	I	4798104	4798142	-	3	0	10	0	0	10	0
SPAC22F8.07c	rtf1	4	I	4797954	4797991	-	2	6	17	0.352941	5	11	0.454545
SPAC22F8.07c	rtf1	4	I	4797954	4797991	-	1	9	24	0.375	4	11	0.363636
SPAC22F8.07c	rtf1	4	I	4797954	4797991	-	3	3	13	0.230769	3	12	0.25
SPAC22F8.07c	rtf1	5	I	4797576	4797620	-	1	6	27	0.222222	3	14	0.214286
SPAC22F8.07c	rtf1	5	I	4797576	4797620	-	3	1	23	0.0434783	1	16	0.0625
SPAC22F8.07c	rtf1	5	I	4797576	4797620	-	2	3	23	0.130435	2	12	0.166667
SPAC22F8.07c	rtf1	6	I	4797377	4797423	-	3	12	43	0.27907	2	28	0.0714286
SPAC22F8.07c	rtf1	6	I	4797377	4797423	-	1	13	47	0.276596	1	18	0.0555556
SPAC22F8.07c	rtf1	6	I	4797377	4797423	-	2	13	47	0.276596	2	20	0.1
SPAC22F8.9	rrp16	1	I	4803316	4803370	+	1	1	9	0.111111	0	4	0
SPAC22F8.9	rrp16	1	I	4803316	4803370	+	2	0	2	0	0	5	0
SPAC22G7.2	kap111	4	I	730964	731003	+	3	0	7	0	0	12	0
SPAC22G7.2	kap111	4	I	730964	731003	+	1	0	9	0	2	11	0.181818
SPAC22G7.2	kap111	4	I	730964	731003	+	2	0	10	0	0	4	0
SPAC22G7.2	kap111	5	I	731189	731226	+	1	2	26	0.0769231	1	21	0.047619
SPAC22G7.2	kap111	5	I	731189	731226	+	2	0	27	0	1	17	0.0588235
SPAC22G7.2	kap111	5	I	731189	731226	+	3	3	29	0.103448	0	27	0
SPAC22G7.2	kap111	6	I	731323	731368	+	1	3	29	0.103448	4	24	0.166667
SPAC22G7.2	kap111	6	I	731323	731368	+	3	8	33	0.242424	3	32	0.09375
SPAC22G7.2	kap111	6	I	731323	731368	+	2	5	30	0.166667	2	19	0.105263
SPAC22G7.2	kap111	7	I	731551	731615	+	3	5	51	0.0980392	5	54	0.0925926
SPAC22G7.2	kap111	7	I	731551	731615	+	2	3	47	0.0638298	4	38	0.105263
SPAC22G7.2	kap111	7	I	731551	731615	+	1	4	39	0.102564	2	34	0.0588235
SPAC22G7.09c	nup45	1	I	753080	753155	-	1	0	4	0	0	4	0
SPAC22G7.09c	nup45	2	I	752430	752472	-	1	0	6	0	0	5	0
SPAC22G7.09c	nup45	3	I	752297	752342	-	1	0	8	0	0	7	0
SPAC22G7.09c	nup45	4	I	752132	752187	-	3	0	4	0	0	3	0
SPAC22G7.09c	nup45	4	I	752132	752187	-	1	0	9	0	0	9	0
SPAC22G7.09c	nup45	5	I	751801	751839	-	1	0	42	0	1	33	0.030303
SPAC22G7.09c	nup45	5	I	751801	751839	-	3	1	64	0.015625	1	39	0.025641
SPAC22G7.09c	nup45	5	I	751801	751839	-	2	2	37	0.0540541	1	20	0.05
SPAC22G7.10	iss1	1	I	753842	753886	+	2	0	6	0	0	2	0
SPAC22G7.10	iss1	2	I	753940	753986	+	2	1	7	0.142857	0	3	0
SPAC22G7.10	iss1	2	I	753940	753986	+	3	0	2	0	0	7	0
SPAC22H10.03c	kap114	3	I	2373745	2373791	-	1	2	12	0.166667	1	9	0.111111
SPAC22H10.03c	kap114	3	I	2373745	2373791	-	3	0	8	0	0	8	0
SPAC22H10.03c	kap114	3	I	2373745	2373791	-	2	0	5	0	0	7	0
SPAC22H10.03c	kap114	4	I	2373584	2373625	-	3	0	11	0	1	13	0.0769231
SPAC22H10.03c	kap114	4	I	2373584	2373625	-	2	0	5	0	0	10	0
SPAC22H10.03c	kap114	4	I	2373584	2373625	-	1	3	14	0.214286	0	10	0
SPAC22H10.03c	kap114	5	I	2373377	2373412	-	1	3	15	0.2	1	10	0.1
SPAC22H10.03c	kap114	5	I	2373377	2373412	-	3	2	12	0.166667	1	16	0.0625
SPAC22H10.03c	kap114	5	I	2373377	2373412	-	2	2	8	0.25	2	11	0.181818
SPAC22H10.03c	kap114	6	I	2373264	2373302	-	3	3	14	0.214286	2	20	0.1
SPAC22H10.03c	kap114	6	I	2373264	2373302	-	1	2	22	0.0909091	1	13	0.0769231
SPAC22H10.03c	kap114	6	I	2373264	2373302	-	2	1	12	0.0833333	1	12	0.0833333
SPAC22H10.4	ppa3	2	I	2377653	2377764	+	2	0	17	0	0	7	0
SPAC22H10.4	ppa3	2	I	2377653	2377764	+	1	1	13	0.0769231	0	13	0
SPAC22H10.4	ppa3	2	I	2377653	2377764	+	3	0	8	0	0	18	0
SPAC22H10.05c		1	I	2380027	2380171	-	2	1	3	0.333333	0	3	0
SPAC22H10.12c	gdi1	1	I	2396616	2396700	-	2	0	3	0	0	2	0
SPAC22H10.12c	gdi1	1	I	2396616	2396700	-	3	0	3	0	0	2	0
SPAC22H10.12c	gdi1	1	I	2396616	2396700	-	1	0	8	0	0	2	0
SPAC22H12.2	tfg3	1	I	895408	895596	+	1	1	15	0.0666667	0	7	0
SPAC22H12.2	tfg3	1	I	895408	895596	+	3	0	6	0	0	5	0
SPAC22H12.2	tfg3	2	I	895766	895822	+	2	0	4	0	1	13	0.0769231
SPAC22H12.2	tfg3	2	I	895766	895822	+	1	0	18	0	1	18	0.0555556
SPAC22H12.2	tfg3	2	I	895766	895822	+	3	0	16	0	0	17	0
SPAC22H12.2	tfg3	3	I	895975	896038	+	3	0	26	0	0	32	0
SPAC22H12.2	tfg3	3	I	895975	896038	+	1	0	38	0	1	36	0.0277778
SPAC22H12.2	tfg3	3	I	895975	896038	+	2	0	20	0	0	19	0
SPAC22H12.3		1	I	897164	897241	+	3	1	5	0.2	1	6	0.166667
SPAC22H12.3		1	I	897164	897241	+	2	1	6	0.166667	0	2	0
SPAC22H12.3		2	I	897782	897828	+	2	1	19	0.0526316	1	11	0.0909091
SPAC22H12.3		2	I	897782	897828	+	3	0	19	0	0	15	0
SPAC22H12.3		2	I	897782	897828	+	1	1	14	0.0714286	0	6	0
SPAC23A1.06c	cmk2	3	I	4091358	4091659	-	1	0	4	0	0	2	0
SPAC23A1.11	rpl1602	1	I	4097375	4097429	+	2	0	139	0	0	93	0
SPAC23A1.11	rpl1602	1	I	4097375	4097429	+	3	0	158	0	0	138	0
SPAC23A1.11	rpl1602	1	I	4097375	4097429	+	1	0	126	0	1	115	0.00869565
SPAC23A1.20	new11	1	I	4101270	4101271	-	1	2	2	1	5	5	1
SPAC23A1.20	new11	1	I	4101270	4101271	-	3	4	4	1	4	4	1
SPAC23A1.20	new11	1	I	4101270	4101271	-	2	6	6	1	3	3	1
SPAC23C11.1	ice2	1	I	2133703	2133781	+	1	0	2	0	0	5	0
SPAC23C11.1	ice2	2	I	2134097	2134149	+	3	0	3	0	0	3	0
SPAC23C11.1	ice2	2	I	2134097	2134149	+	1	0	3	0	0	5	0
SPAC23C11.1	ice2	3	I	2134336	2134375	+	1	0	5	0	1	7	0.142857
SPAC23C11.1	ice2	3	I	2134336	2134375	+	2	0	2	0	0	3	0
SPAC23C11.1	ice2	3	I	2134336	2134375	+	3	0	5	0	0	4	0
SPAC23C11.1	ice2	4	I	2134489	2134573	+	3	0	10	0	0	10	0
SPAC23C11.1	ice2	4	I	2134489	2134573	+	2	1	5	0.2	2	6	0.333333
SPAC23C11.1	ice2	4	I	2134489	2134573	+	1	1	5	0.2	1	10	0.1
SPAC23C11.04c	pnk1	3	I	2138211	2138266	-	2	0	2	0	0	3	0
SPAC23C11.8	php3	1	I	2145780	2145926	+	1	0	3	0	0	6	0
SPAC23C11.8	php3	1	I	2145780	2145926	+	2	1	11	0.0909091	0	7	0
SPAC23C11.8	php3	1	I	2145780	2145926	+	3	0	6	0	0	3	0
SPAC23C11.8	php3	2	I	2145988	2146042	+	1	1	4	0.25	0	6	0
SPAC23C11.8	php3	2	I	2145988	2146042	+	3	2	10	0.2	1	6	0.166667
SPAC23C11.8	php3	2	I	2145988	2146042	+	2	2	14	0.142857	0	8	0
SPAC23C11.8	php3	3	I	2146171	2146325	+	3	3	18	0.166667	1	11	0.0909091
SPAC23C11.8	php3	3	I	2146171	2146325	+	1	1	6	0.166667	0	7	0
SPAC23C11.8	php3	3	I	2146171	2146325	+	2	2	16	0.125	1	15	0.0666667
SPAC23C11.10	mpn1	4	I	2151343	2151385	+	2	1	7	0.142857	0	2	0
SPAC23C11.10	mpn1	4	I	2151343	2151385	+	3	2	2	1	1	5	0.2
SPAC23C11.11	cka1	1	I	2152200	2152259	+	1	0	3	0	0	2	0
SPAC23C11.11	cka1	2	I	2152541	2152698	+	2	0	3	0	0	7	0
SPAC23C11.11	cka1	2	I	2152541	2152698	+	1	0	8	0	0	4	0
SPAC23C11.11	cka1	3	I	2153012	2153072	+	3	0	10	0	0	4	0
SPAC23C11.11	cka1	3	I	2153012	2153072	+	1	0	11	0	0	6	0
SPAC23C11.11	cka1	3	I	2153012	2153072	+	2	0	8	0	0	9	0
SPAC23C11.11	cka1	4	I	2153375	2153467	+	1	4	116	0.0344828	2	114	0.0175439
SPAC23C11.11	cka1	4	I	2153375	2153467	+	3	2	164	0.0121951	5	130	0.0384615
SPAC23C11.11	cka1	4	I	2153375	2153467	+	2	4	108	0.037037	2	86	0.0232558
SPAC23C11.13c	hpt1	1	I	2156049	2156322	-	1	0	5	0	0	3	0
SPAC23C11.13c	hpt1	1	I	2156049	2156322	-	3	0	3	0	0	2	0
SPAC23C11.17	mdm28	1	I	2167246	2167301	+	3	0	2	0	0	2	0
SPAC23C11.17	mdm28	1	I	2167246	2167301	+	1	0	6	0	0	3	0
SPAC23C4.8	rho3	2	I	1041746	1042069	+	3	2	6	0.333333	0	7	0
SPAC23C4.8	rho3	2	I	1041746	1042069	+	2	0	5	0	0	10	0
SPAC23C4.8	rho3	2	I	1041746	1042069	+	1	0	12	0	0	15	0
SPAC23C4.09c		2	I	1043672	1043719	-	3	1	4	0.25	0	2	0
SPAC23C4.09c		2	I	1043672	1043719	-	2	0	5	0	1	4	0.25
SPAC23C4.09c		2	I	1043672	1043719	-	1	1	6	0.166667	0	2	0
SPAC23C4.09c		3	I	1043513	1043595	-	2	0	11	0	0	8	0
SPAC23C4.09c		3	I	1043513	1043595	-	1	0	21	0	0	5	0
SPAC23C4.09c		3	I	1043513	1043595	-	3	0	9	0	1	7	0.142857
SPAC23C4.09c		4	I	1043265	1043381	-	3	0	27	0	2	33	0.0606061
SPAC23C4.09c		4	I	1043265	1043381	-	2	1	22	0.0454545	0	20	0
SPAC23C4.09c		4	I	1043265	1043381	-	1	1	38	0.0263158	0	23	0
SPAC23C4.11	atp18	1	I	1047386	1047434	+	3	0	20	0	0	13	0
SPAC23C4.11	atp18	1	I	1047386	1047434	+	1	0	16	0	0	24	0
SPAC23C4.11	atp18	1	I	1047386	1047434	+	2	0	11	0	0	12	0
SPAC23C4.11	atp18	2	I	1047486	1047529	+	3	1	40	0.025	1	25	0.04
SPAC23C4.11	atp18	2	I	1047486	1047529	+	2	2	26	0.0769231	1	21	0.047619
SPAC23C4.11	atp18	2	I	1047486	1047529	+	1	3	35	0.0857143	0	39	0
SPAC23C4.12	hhp2	2	I	1050089	1050174	+	3	0	3	0	0	3	0
SPAC23C4.12	hhp2	2	I	1050089	1050174	+	2	1	4	0.25	0	2	0
SPAC23C4.13	bet1	1	I	1051740	1051782	+	3	1	6	0.166667	1	5	0.2
SPAC23C4.13	bet1	1	I	1051740	1051782	+	1	1	10	0.1	0	8	0
SPAC23C4.13	bet1	1	I	1051740	1051782	+	2	0	8	0	0	2	0
SPAC23C4.13	bet1	2	I	1051922	1051970	+	1	1	10	0.1	1	8	0.125
SPAC23C4.13	bet1	2	I	1051922	1051970	+	3	0	6	0	0	5	0
SPAC23C4.13	bet1	2	I	1051922	1051970	+	2	0	8	0	0	2	0
SPAC23C4.14	alg1	3	I	1054255	1054345	+	2	4	17	0.235294	1	13	0.0769231
SPAC23C4.14	alg1	3	I	1054255	1054345	+	1	8	28	0.285714	3	13	0.230769
SPAC23C4.14	alg1	3	I	1054255	1054345	+	3	4	14	0.285714	3	13	0.230769
SPAC23C4.15	rpb5	1	I	1054810	1054873	+	1	1	24	0.0416667	0	21	0
SPAC23C4.15	rpb5	1	I	1054810	1054873	+	2	0	10	0	0	9	0
SPAC23C4.15	rpb5	1	I	1054810	1054873	+	3	2	11	0.181818	0	11	0
SPAC23C4.15	rpb5	2	I	1054957	1055167	+	3	2	19	0.105263	0	18	0
SPAC23C4.15	rpb5	2	I	1054957	1055167	+	2	0	16	0	0	12	0
SPAC23C4.15	rpb5	2	I	1054957	1055167	+	1	0	32	0	0	23	0
SPAC23C4.17	trm402	4	I	1060105	1060142	+	2	0	9	0	0	6	0
SPAC23C4.17	trm402	4	I	1060105	1060142	+	3	0	12	0	0	17	0
SPAC23C4.17	trm402	4	I	1060105	1060142	+	1	0	23	0	0	6	0
SPAC23C4.17	trm402	5	I	1060671	1060708	+	1	3	31	0.0967742	1	17	0.0588235
SPAC23C4.17	trm402	5	I	1060671	1060708	+	3	3	22	0.136364	2	32	0.0625
SPAC23C4.17	trm402	5	I	1060671	1060708	+	2	2	19	0.105263	1	13	0.0769231
SPAC23D3.7	pup1	1	I	4351068	4351132	+	1	0	2	0	0	2	0
SPAC23D3.7	pup1	2	I	4351279	4351326	+	1	0	3	0	0	2	0
SPAC23D3.7	pup1	2	I	4351279	4351326	+	3	0	2	0	0	2	0
SPAC23D3.8	usp108	1	I	4353360	4353409	+	3	0	9	0	0	12	0
SPAC23D3.8	usp108	1	I	4353360	4353409	+	2	0	11	0	0	16	0
SPAC23D3.8	usp108	1	I	4353360	4353409	+	1	0	18	0	1	11	0.0909091
SPAC23D3.9	arp42	1	I	4355097	4355172	-	1	0	8	0	0	8	0
SPAC23D3.9	arp42	1	I	4355097	4355172	-	3	0	4	0	0	4	0
SPAC23D3.9	arp42	1	I	4355097	4355172	-	2	0	2	0	0	2	0
SPAC23D3.14c	aah2	3	I	4373327	4373370	-	1	2	8	0.25	0	4	0
SPAC23D3.16	lam4	1	I	4365735	4365788	+	2	0	3	0	0	2	0
SPAC23D3.16	lam4	2	I	4365845	4366008	+	2	0	3	0	0	2	0
SPAC23D3.16	lam4	2	I	4365845	4366008	+	1	1	2	0.5	1	4	0.25
SPAC23D3.17		1	I	4366694	4366769	-	2	0	6	0	0	10	0
SPAC23D3.17		1	I	4366694	4366769	-	3	2	6	0.333333	0	9	0
SPAC23D3.17		1	I	4366694	4366769	-	1	3	21	0.142857	0	10	0
SPAC23D3.17		2	I	4366564	4366610	-	2	0	9	0	0	13	0
SPAC23D3.17		2	I	4366564	4366610	-	3	1	12	0.0833333	0	19	0
SPAC23D3.17		2	I	4366564	4366610	-	1	2	25	0.08	0	11	0
SPAC23G3.6	nop58	1	I	876963	877003	+	2	0	11	0	0	3	0
SPAC23G3.6	nop58	1	I	876963	877003	+	1	0	30	0	1	12	0.0833333
SPAC23G3.6	nop58	1	I	876963	877003	+	3	0	13	0	0	18	0
SPAC23G3.6	nop58	2	I	877107	877174	+	1	0	30	0	0	12	0
SPAC23G3.6	nop58	2	I	877107	877174	+	3	0	14	0	0	18	0
SPAC23G3.6	nop58	2	I	877107	877174	+	2	0	11	0	0	3	0
SPAC23G3.11	rpn6	1	I	887837	887898	+	3	0	3	0	0	2	0
SPAC23G3.11	rpn6	1	I	887837	887898	+	1	0	8	0	0	6	0
SPAC23G3.11	rpn6	2	I	887982	888026	+	3	0	8	0	0	5	0
SPAC23G3.11	rpn6	2	I	887982	888026	+	2	0	2	0	0	8	0
SPAC23G3.11	rpn6	2	I	887982	888026	+	1	0	11	0	0	8	0
SPAC23H3.02c	ini1	3	I	2494857	2494895	-	2	1	10	0.1	0	4	0
SPAC23H3.02c	ini1	3	I	2494857	2494895	-	3	1	20	0.05	1	12	0.0833333
SPAC23H3.07c	mrp2	1	I	2505541	2505589	-	1	0	10	0	0	12	0
SPAC23H3.07c	mrp2	1	I	2505541	2505589	-	3	0	8	0	0	9	0
SPAC23H3.07c	mrp2	1	I	2505541	2505589	-	2	1	15	0.0666667	0	11	0
SPAC23H3.07c	mrp2	2	I	2505453	2505493	-	2	5	39	0.128205	4	25	0.16
SPAC23H3.07c	mrp2	2	I	2505453	2505493	-	1	6	28	0.214286	2	33	0.0606061
SPAC23H3.07c	mrp2	2	I	2505453	2505493	-	3	3	31	0.0967742	3	27	0.111111
SPAC23H3.08c	bub3	1	I	2506940	2506984	-	1	2	3	0.666667	2	3	0.666667
SPAC23H4.03c	erv25	1	I	1604397	1604529	+	2	0	5	0	0	7	0
SPAC23H4.03c	erv25	1	I	1604397	1604529	+	1	2	7	0.285714	0	6	0
SPAC23H4.03c	erv25	1	I	1604397	1604529	+	3	0	7	0	0	3	0
SPAC23H4.07c	srp102	1	I	1595363	1595410	+	2	0	7	0	0	14	0
SPAC23H4.07c	srp102	1	I	1595363	1595410	+	1	0	17	0	0	11	0
SPAC23H4.07c	srp102	1	I	1595363	1595410	+	3	0	9	0	0	5	0
SPAC23H4.8	iwr1	1	I	1594341	1594393	-	1	0	4	0	0	2	0
SPAC23H4.8	iwr1	2	I	1594183	1594271	-	1	5	7	0.714286	0	2	0
SPAC23H4.8	iwr1	2	I	1594183	1594271	-	3	2	4	0.5	0	2	0
SPAC23H4.8	iwr1	3	I	1593781	1593869	-	1	1	8	0.125	0	4	0
SPAC23H4.8	iwr1	3	I	1593781	1593869	-	3	1	6	0.166667	0	5	0
SPAC23H4.11c	cnl2	1	I	1589392	1589462	+	1	1	12	0.0833333	0	10	0
SPAC23H4.11c	cnl2	1	I	1589392	1589462	+	3	0	3	0	0	6	0
SPAC23H4.11c	cnl2	1	I	1589392	1589462	+	2	0	9	0	0	3	0
SPAC23H4.12	alp13	1	I	1587574	1587622	-	1	0	10	0	0	2	0
SPAC23H4.12	alp13	1	I	1587574	1587622	-	2	0	2	0	0	3	0
SPAC23H4.13c		1	I	1586864	1586943	+	1	2	7	0.285714	0	4	0
SPAC23H4.13c		1	I	1586864	1586943	+	2	1	3	0.333333	0	2	0
SPAC23H4.16c	not11	1	I	1578446	1578491	+	3	4	5	0.8	2	4	0.5
SPAC23H4.16c	not11	2	I	1578657	1578792	+	3	0	9	0	0	6	0
SPAC23H4.16c	not11	3	I	1578985	1579042	+	2	0	6	0	0	11	0
SPAC23H4.16c	not11	3	I	1578985	1579042	+	1	1	17	0.0588235	0	12	0
SPAC23H4.16c	not11	3	I	1578985	1579042	+	3	0	26	0	0	21	0
SPAC23H4.18c	rbx1	2	I	1575823	1575885	+	2	1	4	0.25	1	6	0.166667
SPAC23H4.18c	rbx1	2	I	1575823	1575885	+	3	1	7	0.142857	0	2	0
SPAC23H4.18c	rbx1	2	I	1575823	1575885	+	1	0	8	0	0	4	0
SPAC23H4.18c	rbx1	3	I	1575977	1576020	+	2	5	52	0.0961538	1	34	0.0294118
SPAC23H4.18c	rbx1	3	I	1575977	1576020	+	1	2	63	0.031746	4	52	0.0769231
SPAC23H4.18c	rbx1	3	I	1575977	1576020	+	3	4	50	0.08	4	57	0.0701754
SPAC24C9.02c	cyt2	1	I	3039996	3040087	-	3	0	14	0	0	14	0
SPAC24C9.02c	cyt2	1	I	3039996	3040087	-	1	0	21	0	0	9	0
SPAC24C9.02c	cyt2	1	I	3039996	3040087	-	2	0	14	0	0	11	0
SPAC24C9.11	sgd1	2	I	3068371	3068413	+	3	2	7	0.285714	0	5	0
SPAC24C9.11	sgd1	2	I	3068371	3068413	+	1	1	8	0.125	0	2	0
SPAC24C9.11	sgd1	3	I	3068735	3068781	+	1	5	71	0.0704225	2	42	0.047619
SPAC24C9.11	sgd1	3	I	3068735	3068781	+	2	1	60	0.0166667	0	58	0
SPAC24C9.11	sgd1	3	I	3068735	3068781	+	3	2	77	0.025974	0	60	0
SPAC24C9.16c	cox8	1	I	3043158	3043224	-	2	0	13	0	0	7	0
SPAC24C9.16c	cox8	1	I	3043158	3043224	-	3	1	18	0.0555556	0	18	0
SPAC24C9.16c	cox8	1	I	3043158	3043224	-	1	1	28	0.0357143	1	23	0.0434783
SPAC24C9.16c	cox8	2	I	3042910	3043095	-	1	0	44	0	1	36	0.0277778
SPAC24C9.16c	cox8	2	I	3042910	3043095	-	3	1	27	0.037037	0	31	0
SPAC24C9.16c	cox8	2	I	3042910	3043095	-	2	0	23	0	0	13	0
SPAC24C9.16c	cox8	3	I	3042818	3042871	-	1	1	50	0.02	2	41	0.0487805
SPAC24C9.16c	cox8	3	I	3042818	3042871	-	2	3	26	0.115385	1	16	0.0625
SPAC24C9.16c	cox8	3	I	3042818	3042871	-	3	5	33	0.151515	3	36	0.0833333
SPAC24H6.3	cul3	4	I	486823	486866	-	3	0	2	0	0	2	0
SPAC24H6.3	cul3	4	I	486823	486866	-	2	0	2	0	0	2	0
SPAC24H6.3	cul3	5	I	486598	486648	-	3	0	2	0	0	2	0
SPAC24H6.3	cul3	5	I	486598	486648	-	2	0	2	0	0	2	0
SPAC24H6.3	cul3	6	I	486132	486187	-	3	0	31	0	0	15	0
SPAC24H6.3	cul3	6	I	486132	486187	-	2	0	29	0	0	19	0
SPAC24H6.3	cul3	6	I	486132	486187	-	1	2	26	0.0769231	0	16	0
SPAC24H6.7	rps901	1	I	476054	476098	-	1	2	493	0.0040568	4	395	0.0101266
SPAC24H6.7	rps901	1	I	476054	476098	-	3	0	359	0	1	419	0.00238663
SPAC24H6.7	rps901	1	I	476054	476098	-	2	3	362	0.00828729	1	254	0.00393701
SPAC25B8.06c	dia4	1	I	4164600	4164656	-	3	0	6	0	0	3	0
SPAC25B8.06c	dia4	1	I	4164600	4164656	-	1	0	4	0	0	3	0
SPAC25B8.06c	dia4	1	I	4164600	4164656	-	2	1	5	0.2	0	2	0
SPAC25B8.11		1	I	4175509	4175554	+	3	0	3	0	0	4	0
SPAC25G10.3	zip1	1	I	4299959	4300021	+	3	0	16	0	0	13	0
SPAC25G10.3	zip1	1	I	4299959	4300021	+	1	0	15	0	0	6	0
SPAC25G10.3	zip1	1	I	4299959	4300021	+	2	0	13	0	0	9	0
SPAC25G10.05c	his1	1	I	4305570	4305728	-	1	0	8	0	0	4	0
SPAC25G10.05c	his1	1	I	4305570	4305728	-	2	0	7	0	0	5	0
SPAC25G10.05c	his1	1	I	4305570	4305728	-	3	0	4	0	0	2	0
SPAC25G10.6	rps2801	1	I	4306039	4306187	+	1	4	54	0.0740741	1	69	0.0144928
SPAC25G10.6	rps2801	1	I	4306039	4306187	+	3	1	20	0.05	1	45	0.0222222
SPAC25G10.6	rps2801	1	I	4306039	4306187	+	2	5	34	0.147059	0	30	0
SPAC25H1.10c	atp19	1	I	2533128	2533169	-	2	0	6	0	0	2	0
SPAC25H1.10c	atp19	1	I	2533128	2533169	-	1	2	9	0.222222	0	4	0
SPAC25H1.10c	atp19	2	I	2532929	2532990	-	3	0	16	0	0	53	0
SPAC25H1.10c	atp19	2	I	2532929	2532990	-	1	0	84	0	0	69	0
SPAC25H1.10c	atp19	2	I	2532929	2532990	-	2	0	29	0	0	29	0
SPAC26A3.2	myh1	2	I	3335881	3335923	+	3	0	6	0	0	6	0
SPAC26A3.2	myh1	2	I	3335881	3335923	+	1	0	8	0	0	5	0
SPAC26A3.2	myh1	2	I	3335881	3335923	+	2	0	3	0	0	4	0
SPAC26A3.6	bud23	2	I	3344909	3345030	+	1	0	5	0	0	2	0
SPAC26A3.8	smb1	1	I	3347056	3347120	+	2	0	36	0	0	30	0
SPAC26A3.8	smb1	1	I	3347056	3347120	+	3	0	39	0	0	44	0
SPAC26A3.8	smb1	1	I	3347056	3347120	+	1	1	54	0.0185185	0	41	0
SPAC26A3.11		1	I	3357080	3357128	+	2	0	3	0	0	5	0
SPAC26A3.11		1	I	3357080	3357128	+	3	0	7	0	0	2	0
SPAC26A3.11		1	I	3357080	3357128	+	1	0	5	0	0	8	0
SPAC26A3.14c		1	I	3367021	3367053	-	2	0	8	0	0	4	0
SPAC26A3.14c		1	I	3367021	3367053	-	3	0	2	0	1	5	0.2
SPAC26A3.14c		1	I	3367021	3367053	-	1	2	8	0.25	2	5	0.4
SPAC26A3.14c		2	I	3366873	3366931	-	2	1	8	0.125	0	4	0
SPAC26A3.14c		2	I	3366873	3366931	-	1	2	8	0.25	1	5	0.2
SPAC26A3.14c		2	I	3366873	3366931	-	3	0	2	0	1	5	0.2
SPAC26F1.2	pnn1	1	I	5182633	5182720	-	2	0	2	0	0	4	0
SPAC26F1.2	pnn1	1	I	5182633	5182720	-	1	0	3	0	0	5	0
SPAC26F1.2	pnn1	1	I	5182633	5182720	-	3	0	2	0	0	3	0
SPAC26F1.2	pnn1	2	I	5182123	5182190	-	1	0	3	0	0	5	0
SPAC26F1.2	pnn1	2	I	5182123	5182190	-	3	0	2	0	0	3	0
SPAC26F1.2	pnn1	2	I	5182123	5182190	-	2	0	2	0	0	4	0
SPAC26F1.12c	hgh1	2	I	5154943	5154993	+	1	0	3	0	1	3	0.333333
SPAC26H5.02c	mgs1	1	I	4118339	4118381	-	1	2	2	1	0	2	0
SPAC26H5.02c	mgs1	2	I	4118263	4118307	-	2	4	12	0.333333	0	5	0
SPAC26H5.02c	mgs1	2	I	4118263	4118307	-	1	1	5	0.2	1	4	0.25
SPAC26H5.02c	mgs1	2	I	4118263	4118307	-	3	1	7	0.142857	0	4	0
SPAC26H5.02c	mgs1	3	I	4118201	4118244	-	1	1	7	0.142857	0	6	0
SPAC26H5.02c	mgs1	3	I	4118201	4118244	-	2	2	15	0.133333	0	6	0
SPAC26H5.02c	mgs1	3	I	4118201	4118244	-	3	0	9	0	0	4	0
SPAC26H5.02c	mgs1	4	I	4117386	4117425	-	2	1	18	0.0555556	0	7	0
SPAC26H5.02c	mgs1	4	I	4117386	4117425	-	3	2	10	0.2	0	5	0
SPAC26H5.02c	mgs1	4	I	4117386	4117425	-	1	1	7	0.142857	0	7	0
SPAC26H5.3	pcf2	3	I	4120513	4120577	+	3	1	2	0.5	0	3	0
SPAC26H5.07c		1	I	4133300	4133376	-	1	0	6	0	0	6	0
SPAC26H5.07c		1	I	4133300	4133376	-	3	0	4	0	0	3	0
SPAC26H5.07c		1	I	4133300	4133376	-	2	0	3	0	0	4	0
SPAC26H5.07c		2	I	4132924	4133226	-	3	0	6	0	0	4	0
SPAC26H5.07c		2	I	4132924	4133226	-	1	0	7	0	0	8	0
SPAC26H5.07c		2	I	4132924	4133226	-	2	0	5	0	0	4	0
SPAC26H5.09c		1	I	4138719	4138979	-	3	0	6	0	0	6	0
SPAC26H5.09c		1	I	4138719	4138979	-	1	0	3	0	0	3	0
SPAC26H5.09c		1	I	4138719	4138979	-	2	1	8	0.125	0	3	0
SPAC27D7.07c	smd1	1	I	4520934	4520976	-	1	0	2	0	0	2	0
SPAC27D7.07c	smd1	2	I	4520828	4520883	-	1	1	4	0.25	0	2	0
SPAC27D7.08c	mtl16	5	I	4521993	4522039	-	1	1	7	0.142857	0	2	0
SPAC27D7.08c	mtl16	5	I	4521993	4522039	-	2	1	2	0.5	0	4	0
SPAC27D7.08c	mtl16	5	I	4521993	4522039	-	3	0	3	0	0	5	0
SPAC27D7.08c	mtl16	6	I	4521847	4521902	-	2	3	9	0.333333	1	7	0.142857
SPAC27D7.08c	mtl16	6	I	4521847	4521902	-	1	2	11	0.181818	2	7	0.285714
SPAC27D7.08c	mtl16	6	I	4521847	4521902	-	3	6	11	0.545455	3	15	0.2
SPAC27E2.1		1	I	4002861	4002963	+	3	0	3	0	0	5	0
SPAC27E2.1		2	I	4003417	4003466	+	3	0	10	0	0	5	0
SPAC27E2.1		2	I	4003417	4003466	+	2	1	13	0.0769231	0	3	0
SPAC27E2.1		2	I	4003417	4003466	+	1	0	6	0	0	5	0
SPAC27E2.2	yih1	1	I	4005062	4005153	+	2	0	9	0	0	6	0
SPAC27E2.2	yih1	1	I	4005062	4005153	+	3	0	8	0	0	9	0
SPAC27E2.2	yih1	1	I	4005062	4005153	+	1	0	5	0	0	13	0
SPAC27E2.2	yih1	2	I	4005274	4005340	+	2	1	18	0.0555556	1	12	0.0833333
SPAC27E2.2	yih1	2	I	4005274	4005340	+	3	0	18	0	0	27	0
SPAC27E2.2	yih1	2	I	4005274	4005340	+	1	0	12	0	0	17	0
SPAC27E2.5	cdc1	1	I	4016191	4016239	+	1	0	6	0	0	3	0
SPAC27E2.5	cdc1	1	I	4016191	4016239	+	3	0	4	0	0	4	0
SPAC27E2.5	cdc1	1	I	4016191	4016239	+	2	0	2	0	0	4	0
SPAC27E2.10c	rfc3	1	I	4035544	4035708	-	3	0	5	0	0	3	0
SPAC27E2.10c	rfc3	1	I	4035544	4035708	-	1	1	10	0.1	1	8	0.125
SPAC27E2.10c	rfc3	2	I	4035430	4035478	-	1	0	15	0	0	11	0
SPAC27E2.10c	rfc3	2	I	4035430	4035478	-	3	1	5	0.2	1	7	0.142857
SPAC27E2.10c	rfc3	3	I	4035165	4035215	-	1	0	19	0	0	12	0
SPAC27E2.10c	rfc3	3	I	4035165	4035215	-	2	0	12	0	0	3	0
SPAC27E2.10c	rfc3	3	I	4035165	4035215	-	3	0	6	0	0	7	0
SPAC27E2.10c	rfc3	4	I	4034950	4035090	-	3	0	16	0	0	11	0
SPAC27E2.10c	rfc3	4	I	4034950	4035090	-	2	1	18	0.0555556	0	9	0
SPAC27E2.10c	rfc3	4	I	4034950	4035090	-	1	0	25	0	0	15	0
SPAC27E2.10c	rfc3	5	I	4034517	4034577	-	2	0	23	0	0	10	0
SPAC27E2.10c	rfc3	5	I	4034517	4034577	-	1	0	28	0	1	17	0.0588235
SPAC27E2.10c	rfc3	5	I	4034517	4034577	-	3	0	23	0	0	12	0
SPAC27E2.14		1	I	4012612	4012662	-	3	5	6	0.833333	4	7	0.571429
SPAC27E2.14		1	I	4012612	4012662	-	1	10	11	0.909091	4	8	0.5
SPAC27F1.02c	cdc8	1	I	4320128	4320186	-	2	0	31	0	0	27	0
SPAC27F1.02c	cdc8	1	I	4320128	4320186	-	1	0	60	0	0	43	0
SPAC27F1.02c	cdc8	1	I	4320128	4320186	-	3	0	40	0	0	30	0
SPAC29A4.02c		1	I	5144035	5144327	+	3	0	12	0	0	12	0
SPAC29A4.02c		1	I	5144035	5144327	+	1	0	23	0	0	10	0
SPAC29A4.02c		1	I	5144035	5144327	+	2	0	22	0	0	7	0
SPAC29A4.08c	prp19	1	I	5133300	5133339	+	1	0	9	0	0	9	0
SPAC29A4.08c	prp19	1	I	5133300	5133339	+	2	0	5	0	0	5	0
SPAC29A4.08c	prp19	1	I	5133300	5133339	+	3	0	3	0	0	9	0
SPAC29A4.08c	prp19	2	I	5133445	5133929	+	3	0	4	0	0	10	0
SPAC29A4.08c	prp19	2	I	5133445	5133929	+	1	0	10	0	0	10	0
SPAC29A4.08c	prp19	2	I	5133445	5133929	+	2	0	7	0	0	5	0
SPAC29A4.9		1	I	5132795	5132834	-	3	0	7	0	0	3	0
SPAC29A4.9		1	I	5132795	5132834	-	1	0	12	0	0	5	0
SPAC29A4.9		1	I	5132795	5132834	-	2	1	10	0.1	0	3	0
SPAC29A4.9		2	I	5132642	5132688	-	2	0	18	0	0	16	0
SPAC29A4.9		2	I	5132642	5132688	-	1	1	28	0.0357143	0	17	0
SPAC29A4.9		2	I	5132642	5132688	-	3	1	27	0.037037	0	13	0
SPAC29A4.14c	pex3	1	I	5119831	5119886	+	3	0	2	0	0	3	0
SPAC29A4.14c	pex3	2	I	5120334	5120440	+	1	1	7	0.142857	0	3	0
SPAC29A4.14c	pex3	2	I	5120334	5120440	+	3	1	8	0.125	0	6	0
SPAC29A4.14c	pex3	2	I	5120334	5120440	+	2	0	3	0	0	3	0
SPAC29A4.20	elp3	1	I	5104606	5104700	-	3	0	4	0	0	9	0
SPAC29A4.20	elp3	1	I	5104606	5104700	-	1	0	4	0	0	7	0
SPAC29A4.20	elp3	1	I	5104606	5104700	-	2	0	3	0	0	5	0
SPAC29A4.23		2	I	5139425	5139426	+	1	2	2	1	4	4	1
SPAC29E6.2	prp3	4	I	4405436	4405518	+	3	0	2	0	0	3	0
SPAC29E6.4	nnf1	1	I	4410191	4410191	+	1	0	3	0	0	4	0
SPAC29E6.05c	mxr1	1	I	4410634	4410688	-	2	1	11	0.0909091	0	9	0
SPAC29E6.05c	mxr1	1	I	4410634	4410688	-	1	3	17	0.176471	2	4	0.5
SPAC29E6.05c	mxr1	1	I	4410634	4410688	-	3	0	5	0	0	5	0
SPAC29E6.8	tbp1	1	I	4415750	4416004	+	3	3	20	0.15	7	40	0.175
SPAC29E6.8	tbp1	1	I	4415750	4416004	+	2	2	27	0.0740741	4	23	0.173913
SPAC29E6.8	tbp1	1	I	4415750	4416004	+	1	4	38	0.105263	8	37	0.216216
SPAC29E6.8	tbp1	2	I	4416066	4416117	+	1	19	89	0.213483	11	90	0.122222
SPAC29E6.8	tbp1	2	I	4416066	4416117	+	2	7	57	0.122807	3	43	0.0697674
SPAC29E6.8	tbp1	2	I	4416066	4416117	+	3	9	52	0.173077	3	67	0.0447761
SPAC29E6.8	tbp1	3	I	4416379	4416448	+	1	22	302	0.0728477	10	245	0.0408163
SPAC29E6.8	tbp1	3	I	4416379	4416448	+	2	3	165	0.0181818	1	120	0.00833333
SPAC29E6.8	tbp1	3	I	4416379	4416448	+	3	8	155	0.0516129	2	189	0.010582
SPAC2C4.03c	smd2	1	I	4264488	4264544	-	3	0	6	0	0	15	0
SPAC2C4.03c	smd2	1	I	4264488	4264544	-	2	0	17	0	0	22	0
SPAC2C4.03c	smd2	1	I	4264488	4264544	-	1	0	26	0	0	20	0
SPAC2C4.03c	smd2	2	I	4264327	4264386	-	1	1	26	0.0384615	0	20	0
SPAC2C4.03c	smd2	2	I	4264327	4264386	-	2	0	17	0	0	22	0
SPAC2C4.03c	smd2	2	I	4264327	4264386	-	3	0	6	0	0	15	0
SPAC2C4.03c	smd2	3	I	4264153	4264213	-	2	0	25	0	0	32	0
SPAC2C4.03c	smd2	3	I	4264153	4264213	-	3	0	15	0	0	32	0
SPAC2C4.03c	smd2	3	I	4264153	4264213	-	1	1	42	0.0238095	0	35	0
SPAC2C4.5	cor1	1	I	4267234	4267320	+	2	0	21	0	0	13	0
SPAC2C4.5	cor1	1	I	4267234	4267320	+	1	0	48	0	2	29	0.0689655
SPAC2C4.5	cor1	1	I	4267234	4267320	+	3	0	16	0	0	13	0
SPAC2C4.9		1	I	4276245	4276293	+	2	1	5	0.2	0	2	0
SPAC2C4.9		1	I	4276245	4276293	+	1	1	4	0.25	2	13	0.153846
SPAC2C4.9		1	I	4276245	4276293	+	3	1	8	0.125	1	9	0.111111
SPAC2C4.9		2	I	4276681	4276743	+	1	1	5	0.2	3	14	0.214286
SPAC2C4.9		2	I	4276681	4276743	+	3	3	13	0.230769	2	16	0.125
SPAC2C4.9		2	I	4276681	4276743	+	2	1	7	0.142857	0	6	0
SPAC2C4.10c	csc4	1	I	4277583	4277651	-	2	0	2	0	0	3	0
SPAC2C4.10c	csc4	1	I	4277583	4277651	-	3	0	2	0	0	3	0
SPAC2C4.10c	csc4	2	I	4277318	4277369	-	3	0	3	0	0	4	0
SPAC2C4.10c	csc4	2	I	4277318	4277369	-	2	0	2	0	0	3	0
SPAC2F3.04c	rim1	1	I	3927885	3927968	-	1	0	12	0	0	5	0
SPAC2F3.11	ppx1	1	I	3946696	3946737	+	1	4	7	0.571429	1	2	0.5
SPAC2F3.11	ppx1	1	I	3946696	3946737	+	2	2	3	0.666667	1	2	0.5
SPAC2F3.12c	plp1	1	I	3948691	3948734	-	2	3	28	0.107143	4	30	0.133333
SPAC2F3.12c	plp1	1	I	3948691	3948734	-	3	4	29	0.137931	1	25	0.04
SPAC2F3.12c	plp1	1	I	3948691	3948734	-	1	4	19	0.210526	4	22	0.181818
SPAC2F3.12c	plp1	2	I	3948494	3948537	-	2	2	31	0.0645161	2	37	0.0540541
SPAC2F3.12c	plp1	2	I	3948494	3948537	-	3	2	39	0.0512821	2	34	0.0588235
SPAC2F3.12c	plp1	2	I	3948494	3948537	-	1	1	23	0.0434783	0	26	0
SPAC2F3.12c	plp1	3	I	3948359	3948406	-	2	0	115	0	0	99	0
SPAC2F3.12c	plp1	3	I	3948359	3948406	-	3	5	144	0.0347222	1	115	0.00869565
SPAC2F3.12c	plp1	3	I	3948359	3948406	-	1	1	64	0.015625	2	72	0.0277778
SPAC2F3.12c	plp1	4	I	3948242	3948282	-	3	8	153	0.0522876	2	121	0.0165289
SPAC2F3.12c	plp1	4	I	3948242	3948282	-	1	1	69	0.0144928	6	77	0.0779221
SPAC2F3.12c	plp1	4	I	3948242	3948282	-	2	1	122	0.00819672	8	104	0.0769231
SPAC2F3.16		3	I	3958005	3958066	+	1	0	11	0	0	9	0
SPAC2F3.16		3	I	3958005	3958066	+	3	0	21	0	1	9	0.111111
SPAC2F3.16		3	I	3958005	3958066	+	2	3	22	0.136364	0	11	0
SPAC2F3.17c	lsm6	1	I	3923886	3923994	-	2	0	7	0	0	4	0
SPAC2F3.17c	lsm6	1	I	3923886	3923994	-	3	0	5	0	0	9	0
SPAC2F3.17c	lsm6	1	I	3923886	3923994	-	1	1	12	0.0833333	0	11	0
SPAC2F3.17c	lsm6	2	I	3923722	3923771	-	1	1	28	0.0357143	0	39	0
SPAC2F3.17c	lsm6	2	I	3923722	3923771	-	3	4	26	0.153846	3	27	0.111111
SPAC2F3.17c	lsm6	2	I	3923722	3923771	-	2	1	23	0.0434783	0	25	0
SPAC2F3.18c		1	I	3942670	3942774	-	3	0	4	0	0	3	0
SPAC2F3.18c		1	I	3942670	3942774	-	2	0	5	0	0	3	0
SPAC2F3.18c		2	I	3942365	3942505	-	1	9	69	0.130435	1	54	0.0185185
SPAC2F3.18c		2	I	3942365	3942505	-	2	4	40	0.1	1	33	0.030303
SPAC2F3.18c		2	I	3942365	3942505	-	3	4	50	0.08	0	53	0
SPAC2F7.4	med1	2	I	539323	539364	+	3	0	4	0	0	6	0
SPAC2F7.4	med1	2	I	539323	539364	+	1	1	10	0.1	0	4	0
SPAC2F7.4	med1	2	I	539323	539364	+	2	0	7	0	0	6	0
SPAC2F7.15	rsm24	1	I	564465	564552	+	2	0	2	0	0	3	0
SPAC2F7.15	rsm24	1	I	564465	564552	+	3	0	6	0	0	6	0
SPAC2F7.15	rsm24	1	I	564465	564552	+	1	0	15	0	0	16	0
SPAC2F7.17	mrf1	1	I	570407	570548	+	3	0	2	0	0	4	0
SPAC2F7.17	mrf1	1	I	570407	570548	+	1	0	3	0	0	3	0
SPAC2F7.17	mrf1	2	I	570648	570884	+	3	0	3	0	0	5	0
SPAC2F7.17	mrf1	2	I	570648	570884	+	1	0	3	0	0	5	0
SPAC2G11.03c	vps45	3	I	812140	812191	-	3	0	4	0	0	3	0
SPAC2G11.6	vps4	1	I	818141	818206	+	1	0	5	0	0	2	0
SPAC2G11.6	vps4	2	I	818319	818428	+	2	0	2	0	0	2	0
SPAC2G11.6	vps4	2	I	818319	818428	+	1	0	5	0	0	3	0
SPAC2G11.6	vps4	3	I	818916	818974	+	1	1	7	0.142857	0	6	0
SPAC2G11.6	vps4	3	I	818916	818974	+	3	1	4	0.25	1	4	0.25
SPAC2G11.6	vps4	3	I	818916	818974	+	2	0	4	0	0	2	0
SPAC2G11.07c	ptc3	1	I	821119	821376	-	2	0	5	0	0	2	0
SPAC2G11.07c	ptc3	1	I	821119	821376	-	3	0	3	0	0	5	0
SPAC2G11.07c	ptc3	2	I	821006	821044	-	3	0	6	0	0	12	0
SPAC2G11.07c	ptc3	2	I	821006	821044	-	2	0	8	0	0	7	0
SPAC2G11.07c	ptc3	2	I	821006	821044	-	1	0	11	0	0	3	0
SPAC2G11.11c	prh1	2	I	829313	829355	-	3	0	9	0	0	17	0
SPAC2G11.11c	prh1	2	I	829313	829355	-	1	1	16	0.0625	4	14	0.285714
SPAC2G11.11c	prh1	2	I	829313	829355	-	2	1	16	0.0625	0	10	0
SPAC2G11.15c	tgs1	1	I	842242	842320	-	1	1	2	0.5	2	4	0.5
SPAC2G11.15c	tgs1	2	I	842054	842125	-	3	0	2	0	0	3	0
SPAC2G11.15c	tgs1	2	I	842054	842125	-	1	0	2	0	0	4	0
SPAC2G11.15c	tgs1	3	I	841860	841907	-	2	0	3	0	0	4	0
SPAC2G11.15c	tgs1	3	I	841860	841907	-	1	2	4	0.5	0	7	0
SPAC2G11.15c	tgs1	3	I	841860	841907	-	3	0	3	0	0	4	0
SPAC2H10.02c	nas2	1	I	5276756	5276826	-	3	1	4	0.25	0	2	0
SPAC2H10.02c	nas2	1	I	5276756	5276826	-	1	0	2	0	0	3	0
SPAC30.02c	kti12	1	I	4393573	4393717	-	3	0	3	0	0	2	0
SPAC30.02c	kti12	1	I	4393573	4393717	-	1	0	5	0	0	8	0
SPAC30.03c	tsn1	1	I	4395492	4395529	-	1	0	4	0	0	3	0
SPAC30.03c	tsn1	2	I	4395368	4395415	-	3	2	4	0.5	1	4	0.25
SPAC30.03c	tsn1	2	I	4395368	4395415	-	1	2	12	0.166667	0	4	0
SPAC30.03c	tsn1	3	I	4395093	4395130	-	3	1	13	0.0769231	1	11	0.0909091
SPAC30.03c	tsn1	3	I	4395093	4395130	-	1	2	29	0.0689655	1	18	0.0555556
SPAC30.03c	tsn1	3	I	4395093	4395130	-	2	1	15	0.0666667	1	15	0.0666667
SPAC30.03c	tsn1	4	I	4394968	4395009	-	1	4	47	0.0851064	0	30	0
SPAC30.03c	tsn1	4	I	4394968	4395009	-	3	1	36	0.0277778	0	21	0
SPAC30.03c	tsn1	4	I	4394968	4395009	-	2	1	27	0.037037	0	23	0
SPAC30.03c	tsn1	5	I	4394742	4394798	-	2	1	28	0.0357143	0	27	0
SPAC30.03c	tsn1	5	I	4394742	4394798	-	3	1	41	0.0243902	0	26	0
SPAC30.03c	tsn1	5	I	4394742	4394798	-	1	3	59	0.0508475	0	36	0
SPAC30C2.5	erv14	1	I	4639925	4639968	+	2	0	2	0	0	4	0
SPAC30C2.5	erv14	1	I	4639925	4639968	+	3	1	2	0.5	0	3	0
SPAC30C2.5	erv14	1	I	4639925	4639968	+	1	0	6	0	0	5	0
SPAC30C2.5	erv14	2	I	4640021	4640075	+	2	0	31	0	1	32	0.03125
SPAC30C2.5	erv14	2	I	4640021	4640075	+	1	2	92	0.0217391	1	69	0.0144928
SPAC30C2.5	erv14	2	I	4640021	4640075	+	3	0	25	0	0	38	0
SPAC30C2.5	erv14	3	I	4640366	4640446	+	3	0	41	0	1	51	0.0196078
SPAC30C2.5	erv14	3	I	4640366	4640446	+	1	1	128	0.0078125	2	96	0.0208333
SPAC30C2.5	erv14	3	I	4640366	4640446	+	2	0	42	0	1	41	0.0243902
SPAC30C2.8		1	I	4645723	4645853	+	2	0	5	0	0	4	0
SPAC30C2.8		1	I	4645723	4645853	+	3	0	3	0	0	3	0
SPAC30C2.8		2	I	4646590	4646645	+	2	0	7	0	0	5	0
SPAC30C2.8		2	I	4646590	4646645	+	3	0	7	0	0	4	0
SPAC30C2.8		3	I	4646743	4646793	+	1	0	6	0	0	2	0
SPAC30C2.8		3	I	4646743	4646793	+	3	0	12	0	0	6	0
SPAC30C2.8		3	I	4646743	4646793	+	2	0	9	0	0	13	0
SPAC30D11.3	ddx27	2	I	1116203	1116246	-	2	0	109	0	0	94	0
SPAC30D11.3	ddx27	2	I	1116203	1116246	-	3	2	165	0.0121212	0	137	0
SPAC30D11.3	ddx27	2	I	1116203	1116246	-	1	2	154	0.012987	1	109	0.00917431
SPAC30D11.5	aps3	2	I	1110294	1110755	-	1	0	3	0	0	4	0
SPAC30D11.5	aps3	2	I	1110294	1110755	-	2	0	2	0	0	3	0
SPAC30D11.06c	hfl1	2	I	1108847	1109054	+	2	0	3	0	0	2	0
SPAC30D11.08c	phf2	1	I	1106204	1106252	+	1	3	20	0.15	1	12	0.0833333
SPAC30D11.08c	phf2	1	I	1106204	1106252	+	3	0	14	0	1	11	0.0909091
SPAC30D11.08c	phf2	1	I	1106204	1106252	+	2	0	8	0	0	7	0
SPAC30D11.9	cwf19	1	I	1102291	1102334	-	1	1	7	0.142857	0	2	0
SPAC30D11.9	cwf19	1	I	1102291	1102334	-	3	0	2	0	0	2	0
SPAC30D11.9	cwf19	1	I	1102291	1102334	-	2	0	3	0	0	4	0
SPAC30D11.9	cwf19	2	I	1101980	1102022	-	2	0	14	0	1	17	0.0588235
SPAC30D11.9	cwf19	2	I	1101980	1102022	-	1	3	17	0.176471	2	13	0.153846
SPAC30D11.9	cwf19	2	I	1101980	1102022	-	3	3	16	0.1875	1	16	0.0625
SPAC30D11.12	rpl3802	1	I	1097199	1097247	-	3	0	49	0	1	65	0.0153846
SPAC30D11.12	rpl3802	1	I	1097199	1097247	-	2	0	50	0	0	45	0
SPAC30D11.12	rpl3802	1	I	1097199	1097247	-	1	0	62	0	0	62	0
SPAC30D11.12	rpl3802	2	I	1096925	1097011	-	1	1	62	0.016129	0	62	0
SPAC30D11.12	rpl3802	2	I	1096925	1097011	-	3	0	49	0	2	65	0.0307692
SPAC30D11.12	rpl3802	2	I	1096925	1097011	-	2	0	50	0	0	45	0
SPAC30D11.13	hus5	1	I	1095275	1095327	-	3	0	5	0	0	2	0
SPAC30D11.13	hus5	1	I	1095275	1095327	-	2	0	2	0	0	2	0
SPAC30D11.13	hus5	2	I	1094921	1095141	-	3	0	6	0	0	4	0
SPAC30D11.13	hus5	2	I	1094921	1095141	-	1	1	7	0.142857	1	4	0.25
SPAC30D11.13	hus5	2	I	1094921	1095141	-	2	0	3	0	0	4	0
SPAC30D11.13	hus5	3	I	1094855	1094896	-	1	3	10	0.3	2	4	0.5
SPAC30D11.13	hus5	3	I	1094855	1094896	-	2	0	5	0	0	6	0
SPAC30D11.13	hus5	3	I	1094855	1094896	-	3	0	10	0	0	6	0
SPAC30D11.13	hus5	4	I	1094696	1094744	-	3	0	11	0	0	7	0
SPAC30D11.13	hus5	4	I	1094696	1094744	-	2	0	5	0	0	6	0
SPAC30D11.13	hus5	4	I	1094696	1094744	-	1	3	12	0.25	1	4	0.25
SPAC30D11.13	hus5	5	I	1094561	1094615	-	3	5	42	0.119048	3	28	0.107143
SPAC30D11.13	hus5	5	I	1094561	1094615	-	1	5	50	0.1	1	15	0.0666667
SPAC30D11.13	hus5	5	I	1094561	1094615	-	2	3	29	0.103448	5	29	0.172414
SPAC31A2.2	trm112	1	I	388416	388451	+	2	1	11	0.0909091	2	10	0.2
SPAC31A2.2	trm112	1	I	388416	388451	+	3	0	12	0	1	11	0.0909091
SPAC31A2.2	trm112	1	I	388416	388451	+	1	1	8	0.125	0	6	0
SPAC31A2.2	trm112	2	I	388622	388720	+	2	3	29	0.103448	2	29	0.0689655
SPAC31A2.2	trm112	2	I	388622	388720	+	1	4	27	0.148148	0	23	0
SPAC31A2.2	trm112	2	I	388622	388720	+	3	2	29	0.0689655	2	35	0.0571429
SPAC31A2.2	trm112	3	I	388814	388858	+	3	0	40	0	0	40	0
SPAC31A2.2	trm112	3	I	388814	388858	+	1	4	32	0.125	0	28	0
SPAC31A2.2	trm112	3	I	388814	388858	+	2	2	40	0.05	0	33	0
SPAC31A2.3	mrp11	1	I	389565	389616	+	1	0	7	0	0	12	0
SPAC31A2.3	mrp11	1	I	389565	389616	+	3	1	11	0.0909091	0	6	0
SPAC31A2.3	mrp11	1	I	389565	389616	+	2	0	6	0	0	5	0
SPAC31A2.07c	dbp10	1	I	401872	401971	-	3	0	4	0	0	2	0
SPAC31A2.07c	dbp10	1	I	401872	401971	-	1	0	6	0	0	4	0
SPAC31A2.07c	dbp10	1	I	401872	401971	-	2	0	6	0	0	6	0
SPAC31A2.13c	sft1	1	I	414630	414683	-	3	0	2	0	0	3	0
SPAC31A2.15c	dcc1	1	I	419503	419601	-	2	0	6	0	0	2	0
SPAC31A2.15c	dcc1	1	I	419503	419601	-	1	0	5	0	0	5	0
SPAC31A2.15c	dcc1	2	I	419221	419267	-	2	1	8	0.125	0	4	0
SPAC31A2.15c	dcc1	2	I	419221	419267	-	1	0	9	0	0	7	0
SPAC31A2.15c	dcc1	2	I	419221	419267	-	3	0	5	0	0	4	0
SPAC31A2.15c	dcc1	3	I	418721	418758	-	2	3	15	0.2	2	11	0.181818
SPAC31A2.15c	dcc1	3	I	418721	418758	-	1	5	15	0.333333	1	13	0.0769231
SPAC31A2.15c	dcc1	3	I	418721	418758	-	3	3	14	0.214286	0	9	0
SPAC31A2.16	gef2	2	I	423154	423198	+	1	0	4	0	0	8	0
SPAC31A2.16	gef2	2	I	423154	423198	+	2	0	10	0	0	2	0
SPAC31A2.16	gef2	2	I	423154	423198	+	3	0	7	0	0	11	0
SPAC31A2.16	gef2	3	I	423308	423356	+	1	0	4	0	0	8	0
SPAC31A2.16	gef2	3	I	423308	423356	+	2	0	11	0	1	3	0.333333
SPAC31A2.16	gef2	3	I	423308	423356	+	3	0	9	0	0	11	0
SPAC31G5.1	sap49	1	I	2989508	2989564	+	3	0	2	0	0	3	0
SPAC31G5.2	rot1	1	I	2991108	2991156	+	2	3	25	0.12	0	13	0
SPAC31G5.2	rot1	1	I	2991108	2991156	+	1	7	62	0.112903	2	38	0.0526316
SPAC31G5.2	rot1	1	I	2991108	2991156	+	3	0	19	0	0	25	0
SPAC31G5.2	rot1	2	I	2991272	2991497	+	3	0	44	0	0	42	0
SPAC31G5.2	rot1	2	I	2991272	2991497	+	1	0	99	0	1	64	0.015625
SPAC31G5.2	rot1	2	I	2991272	2991497	+	2	1	43	0.0232558	0	38	0
SPAC31G5.05c		1	I	2995689	2995733	-	2	0	6	0	1	3	0.333333
SPAC31G5.12c	maf1	1	I	3009259	3009311	-	1	0	2	0	0	2	0
SPAC31G5.12c	maf1	2	I	3008796	3009159	-	1	0	2	0	0	2	0
SPAC31G5.15	psd3	6	I	3016776	3016825	+	1	1	2	0.5	0	2	0
SPAC31G5.15	psd3	7	I	3016968	3017010	+	1	1	6	0.166667	0	2	0
SPAC31G5.15	psd3	7	I	3016968	3017010	+	2	0	6	0	0	3	0
SPAC31G5.16c	dpm1	1	I	3018074	3018198	-	2	0	8	0	0	7	0
SPAC31G5.16c	dpm1	1	I	3018074	3018198	-	3	0	13	0	0	10	0
SPAC31G5.16c	dpm1	1	I	3018074	3018198	-	1	0	12	0	0	10	0
SPAC31G5.17c	rps1001	1	I	3020011	3020229	-	1	0	36	0	0	19	0
SPAC31G5.17c	rps1001	1	I	3020011	3020229	-	3	1	15	0.0666667	0	24	0
SPAC31G5.17c	rps1001	1	I	3020011	3020229	-	2	0	17	0	0	19	0
SPAC323.02c	pup2	1	I	3910315	3910352	-	2	0	6	0	0	2	0
SPAC323.02c	pup2	1	I	3910315	3910352	-	1	0	9	0	0	7	0
SPAC323.02c	pup2	1	I	3910315	3910352	-	3	0	7	0	0	3	0
SPAC323.02c	pup2	2	I	3909735	3909872	-	2	0	16	0	0	18	0
SPAC323.02c	pup2	2	I	3909735	3909872	-	1	1	22	0.0454545	0	15	0
SPAC323.02c	pup2	2	I	3909735	3909872	-	3	2	20	0.1	0	18	0
SPAC323.02c	pup2	3	I	3909569	3909631	-	2	8	251	0.0318725	2	194	0.0103093
SPAC323.02c	pup2	3	I	3909569	3909631	-	1	9	247	0.0364372	4	215	0.0186047
SPAC323.02c	pup2	3	I	3909569	3909631	-	3	3	247	0.0121457	6	266	0.0225564
SPAC323.03c		3	I	3911785	3911827	-	1	3	4	0.75	0	2	0
SPAC323.4		2	I	3913482	3913543	+	3	1	8	0.125	1	7	0.142857
SPAC323.4		2	I	3913482	3913543	+	2	0	9	0	0	5	0
SPAC323.4		2	I	3913482	3913543	+	1	1	5	0.2	0	5	0
SPAC323.4		3	I	3914056	3914101	+	3	0	21	0	1	21	0.047619
SPAC323.4		3	I	3914056	3914101	+	2	0	25	0	0	15	0
SPAC323.4		3	I	3914056	3914101	+	1	0	13	0	1	8	0.125
SPAC323.06c	uba5	3	I	3917103	3917139	-	1	0	2	0	0	4	0
SPAC323.06c	uba5	4	I	3916874	3916912	-	1	0	2	0	0	4	0
SPAC323.06c	uba5	5	I	3916528	3916568	-	3	1	4	0.25	1	2	0.5
SPAC323.06c	uba5	5	I	3916528	3916568	-	1	0	2	0	0	4	0
SPAC323.06c	uba5	6	I	3916299	3916339	-	1	0	17	0	2	17	0.117647
SPAC323.06c	uba5	6	I	3916299	3916339	-	2	0	16	0	0	8	0
SPAC323.06c	uba5	6	I	3916299	3916339	-	3	1	14	0.0714286	0	9	0
SPAC323.06c	uba5	7	I	3916073	3916107	-	1	1	21	0.047619	2	20	0.1
SPAC323.06c	uba5	7	I	3916073	3916107	-	3	3	20	0.15	1	17	0.0588235
SPAC323.06c	uba5	7	I	3916073	3916107	-	2	1	19	0.0526316	1	12	0.0833333
SPAC323.06c	uba5	8	I	3915822	3915864	-	2	1	21	0.047619	1	12	0.0833333
SPAC323.06c	uba5	8	I	3915822	3915864	-	3	1	21	0.047619	0	17	0
SPAC323.06c	uba5	8	I	3915822	3915864	-	1	2	25	0.08	3	21	0.142857
SPAC323.06c	uba5	9	I	3915699	3915745	-	3	2	23	0.0869565	0	19	0
SPAC323.06c	uba5	9	I	3915699	3915745	-	1	2	25	0.08	3	22	0.136364
SPAC323.06c	uba5	9	I	3915699	3915745	-	2	1	22	0.0454545	1	12	0.0833333
SPAC328.5	hrb1	3	I	3485343	3485381	+	1	1	2	0.5	0	2	0
SPAC328.5	hrb1	4	I	3485484	3485581	+	1	0	2	0	0	2	0
SPAC328.5	hrb1	5	I	3485975	3486055	+	1	0	4	0	1	5	0.2
SPAC328.07c	bsd1	1	I	3492399	3492466	-	1	0	7	0	0	5	0
SPAC328.07c	bsd1	1	I	3492399	3492466	-	3	0	5	0	0	6	0
SPAC328.07c	bsd1	1	I	3492399	3492466	-	2	0	6	0	0	5	0
SPAC328.9		1	I	3494776	3495046	+	2	2	6	0.333333	0	3	0
SPAC328.10c	rps502	1	I	3496989	3497276	-	3	1	55	0.0181818	1	53	0.0188679
SPAC328.10c	rps502	1	I	3496989	3497276	-	2	1	42	0.0238095	0	43	0
SPAC328.10c	rps502	1	I	3496989	3497276	-	1	0	67	0	0	55	0
SPAC32A11.04c	tif212	1	I	2444922	2445001	-	3	0	2	0	0	2	0
SPAC32A11.04c	tif212	1	I	2444922	2445001	-	1	0	12	0	0	5	0
SPAC32A11.04c	tif212	1	I	2444922	2445001	-	2	0	3	0	0	7	0
SPAC343.01c	erg8	1	I	1640812	1640877	-	1	0	17	0	0	6	0
SPAC343.01c	erg8	1	I	1640812	1640877	-	3	0	3	0	0	5	0
SPAC343.01c	erg8	1	I	1640812	1640877	-	2	0	2	0	0	4	0
SPAC343.5	vma1	1	I	1647262	1647316	+	3	0	2	0	0	2	0
SPAC343.5	vma1	2	I	1647417	1647458	+	3	0	2	0	0	2	0
SPAC343.08c	mrp17	2	I	1653307	1653355	-	2	0	2	0	0	2	0
SPAC343.14c	tif222	1	I	1673390	1673441	-	2	3	13	0.230769	0	9	0
SPAC343.14c	tif222	1	I	1673390	1673441	-	3	3	13	0.230769	1	13	0.0769231
SPAC343.14c	tif222	1	I	1673390	1673441	-	1	1	28	0.0357143	1	16	0.0625
SPAC343.14c	tif222	2	I	1672953	1672998	-	3	1	26	0.0384615	2	24	0.0833333
SPAC343.14c	tif222	2	I	1672953	1672998	-	1	4	43	0.0930233	3	28	0.107143
SPAC343.14c	tif222	2	I	1672953	1672998	-	2	4	19	0.210526	1	23	0.0434783
SPAC343.18	rfp2	1	I	1680436	1680488	+	3	0	5	0	0	5	0
SPAC343.18	rfp2	1	I	1680436	1680488	+	1	0	7	0	0	10	0
SPAC3A11.3	efm3	2	I	3467986	3468031	+	1	0	20	0	0	5	0
SPAC3A11.3	efm3	2	I	3467986	3468031	+	2	0	9	0	0	10	0
SPAC3A11.3	efm3	2	I	3467986	3468031	+	3	0	9	0	0	9	0
SPAC3A11.4	sei1	1	I	3466007	3466164	-	3	0	4	0	0	2	0
SPAC3A11.4	sei1	2	I	3465445	3465541	-	1	0	3	0	1	5	0.2
SPAC3A11.4	sei1	2	I	3465445	3465541	-	3	1	6	0.166667	0	7	0
SPAC3A11.4	sei1	3	I	3464260	3464296	-	1	0	9	0	0	7	0
SPAC3A11.4	sei1	3	I	3464260	3464296	-	2	0	9	0	0	5	0
SPAC3A11.4	sei1	3	I	3464260	3464296	-	3	0	8	0	0	14	0
SPAC3A11.6	mvp1	4	I	3460443	3460507	-	1	0	2	0	0	2	0
SPAC3A11.6	mvp1	4	I	3460443	3460507	-	3	0	3	0	1	6	0.166667
SPAC3A11.6	mvp1	5	I	3460373	3460424	-	1	1	3	0.333333	0	3	0
SPAC3A11.6	mvp1	5	I	3460373	3460424	-	3	0	3	0	1	6	0.166667
SPAC3A11.6	mvp1	6	I	3460186	3460233	-	1	0	3	0	1	4	0.25
SPAC3A11.6	mvp1	6	I	3460186	3460233	-	3	0	4	0	1	6	0.166667
SPAC3A11.6	mvp1	7	I	3459898	3459940	-	3	0	4	0	1	7	0.142857
SPAC3A11.6	mvp1	7	I	3459898	3459940	-	1	0	3	0	0	6	0
SPAC3A11.6	mvp1	7	I	3459898	3459940	-	2	0	3	0	0	2	0
SPAC3A11.6	mvp1	8	I	3459666	3459704	-	3	0	7	0	1	7	0.142857
SPAC3A11.6	mvp1	8	I	3459666	3459704	-	1	0	5	0	1	7	0.142857
SPAC3A11.6	mvp1	8	I	3459666	3459704	-	2	0	3	0	0	3	0
SPAC3A11.6	mvp1	9	I	3459437	3459491	-	3	2	7	0.285714	0	7	0
SPAC3A11.6	mvp1	9	I	3459437	3459491	-	1	0	7	0	0	7	0
SPAC3A11.6	mvp1	9	I	3459437	3459491	-	2	1	4	0.25	0	3	0
SPAC3A11.12c	rpt5	1	I	3444097	3444281	+	1	0	2	0	0	2	0
SPAC3A11.12c	rpt5	1	I	3444097	3444281	+	3	0	4	0	0	2	0
SPAC3A11.13	pfd6	2	I	3442049	3442126	-	2	1	9	0.111111	0	3	0
SPAC3A11.13	pfd6	2	I	3442049	3442126	-	1	1	4	0.25	1	6	0.166667
SPAC3A11.13	pfd6	3	I	3441796	3441923	-	2	0	11	0	0	8	0
SPAC3A11.13	pfd6	3	I	3441796	3441923	-	1	1	9	0.111111	1	8	0.125
SPAC3A11.13	pfd6	3	I	3441796	3441923	-	3	0	8	0	0	4	0
SPAC3A11.14c	pkl1	3	I	3441362	3441486	+	1	0	2	0	0	3	0
SPAC3A12.2		2	I	1422553	1422610	+	2	0	3	0	1	3	0.333333
SPAC3A12.2		2	I	1422553	1422610	+	1	2	7	0.285714	1	4	0.25
SPAC3A12.04c	rpp1	4	I	1424709	1424709	-	1	0	3	0	0	2	0
SPAC3A12.11c	cwf2	1	I	1440277	1440325	-	1	0	11	0	0	15	0
SPAC3A12.11c	cwf2	1	I	1440277	1440325	-	3	0	7	0	0	6	0
SPAC3A12.11c	cwf2	2	I	1440058	1440111	-	1	2	16	0.125	0	25	0
SPAC3A12.11c	cwf2	2	I	1440058	1440111	-	3	3	15	0.2	0	12	0
SPAC3A12.11c	cwf2	2	I	1440058	1440111	-	2	1	8	0.125	0	4	0
SPAC3A12.13c	tif310	1	I	1443073	1443115	-	1	0	18	0	0	7	0
[truncated: 4,776 more rows]
